# Supplementary material for: Vascular and cognitive effects of cocoa-rich chocolate in postmenopausal women: a study protocol for a randomised clinical trial
Source: PubMed Central journal article supplement — BMJ Open. 2018 Dec 14;8(12):e024095. doi: 10.1136/bmjopen-2018-024095 (PMC6303642; doi:10.1136/bmjopen-2018-024095), 2018-12-14
Supplement: bmjopen-2018-024095.draft_revisions.pdf [file bmjopen-2018-024095.draft_revisions.pdf]

# BMJ Open

BMJ Open is committed to open peer review. As part of this commitment we make the peer review history of every article we publish publicly available.

When an article is published we post the peer reviewers' comments and the authors' responses online. We also post the versions of the paper that were used during peer review. These are the versions that the peer review comments apply to.

The versions of the paper that follow are the versions that were submitted during the peer review process. They are not the versions of record or the final published versions. They should not be cited or distributed as the published version of this manuscript.

BMJ Open is an open access journal and the full, final, typeset and author-corrected version of record of the manuscript is available on our site with no access controls, subscription charges or pay-per-view fees (<http://bmjopen.bmj.com>).

If you have any questions on BMJ Open's open peer review process please email [info.bmjopen@bmj.com](mailto:info.bmjopen@bmj.com)

# BMJ Open

**The effect of adding chocolate with a high percentage of cocoa and polyphenols to a normal diet on blood pressure, vascular function, body composition, quality of life and cognitive performance in postmenopausal women. Randomized clinical trial. ECCAMP Study.**

|                               |                                                                                                                                                                                                                                                                                                                                                                                                                                                                                                                                                                                                                                                                                                                                                                                                                                                                                                                                                                                                                                                                                                                                                                                                                                                                                                                                                                                                                                                                                                                                                                                                                                                                                                                                                                                                                                                                                                                                                                                                                                                                                                                                                                                                                                                                                        |
|-------------------------------|----------------------------------------------------------------------------------------------------------------------------------------------------------------------------------------------------------------------------------------------------------------------------------------------------------------------------------------------------------------------------------------------------------------------------------------------------------------------------------------------------------------------------------------------------------------------------------------------------------------------------------------------------------------------------------------------------------------------------------------------------------------------------------------------------------------------------------------------------------------------------------------------------------------------------------------------------------------------------------------------------------------------------------------------------------------------------------------------------------------------------------------------------------------------------------------------------------------------------------------------------------------------------------------------------------------------------------------------------------------------------------------------------------------------------------------------------------------------------------------------------------------------------------------------------------------------------------------------------------------------------------------------------------------------------------------------------------------------------------------------------------------------------------------------------------------------------------------------------------------------------------------------------------------------------------------------------------------------------------------------------------------------------------------------------------------------------------------------------------------------------------------------------------------------------------------------------------------------------------------------------------------------------------------|
| Journal:                      | <i>BMJ Open</i>                                                                                                                                                                                                                                                                                                                                                                                                                                                                                                                                                                                                                                                                                                                                                                                                                                                                                                                                                                                                                                                                                                                                                                                                                                                                                                                                                                                                                                                                                                                                                                                                                                                                                                                                                                                                                                                                                                                                                                                                                                                                                                                                                                                                                                                                        |
| Manuscript ID                 | bmjopen-2018-024095                                                                                                                                                                                                                                                                                                                                                                                                                                                                                                                                                                                                                                                                                                                                                                                                                                                                                                                                                                                                                                                                                                                                                                                                                                                                                                                                                                                                                                                                                                                                                                                                                                                                                                                                                                                                                                                                                                                                                                                                                                                                                                                                                                                                                                                                    |
| Article Type:                 | Protocol                                                                                                                                                                                                                                                                                                                                                                                                                                                                                                                                                                                                                                                                                                                                                                                                                                                                                                                                                                                                                                                                                                                                                                                                                                                                                                                                                                                                                                                                                                                                                                                                                                                                                                                                                                                                                                                                                                                                                                                                                                                                                                                                                                                                                                                                               |
| Date Submitted by the Author: | 09-May-2018                                                                                                                                                                                                                                                                                                                                                                                                                                                                                                                                                                                                                                                                                                                                                                                                                                                                                                                                                                                                                                                                                                                                                                                                                                                                                                                                                                                                                                                                                                                                                                                                                                                                                                                                                                                                                                                                                                                                                                                                                                                                                                                                                                                                                                                                            |
| Complete List of Authors:     | <p>Garcia-Yu, Irene; Institute of Biomedical Research of Salamanca (IBSAL), Primary Health Care Research Unit, La Alamedilla Health Center. Health Service of Castilla y León (SACyL); Consejería de Sanidad, Junta de Castilla y León, Public Health Information</p> <p>Garcia-Ortiz, Luis; Institute of Biomedical Research of Salamanca (IBSAL), Primary Health Care Research Unit, La Alamedilla Health Center. Health Service of Castilla y León (SACyL); University of Salamanca, Department of Biomedical and Diagnostic Sciences</p> <p>Gomez-Marcos, Manuel; Institute of Biomedical Research of Salamanca (IBSAL), Primary Health Care Research Unit, La Alamedilla Health Center. Health Service of Castilla y León (SACyL); University of Salamanca, Medicine</p> <p>Alonso-Dominguez, Rosario; Institute of Biomedical Research of Salamanca (IBSAL), Primary Health Care Research Unit, La Alamedilla Health Center. Health Service of Castilla y León (SACyL)</p> <p>González-Sánchez, J; Institute of Biomedical Research of Salamanca (IBSAL), Primary Health Care Research Unit, La Alamedilla Health Center. Health Service of Castilla y León (SACyL); University of Extremadura, Nursing</p> <p>Mora-Simon, Sara; Institute of Biomedical Research of Salamanca (IBSAL), Primary Health Care Research Unit, La Alamedilla Health Center. Health Service of Castilla y León (SACyL); University of Salamanca, Basic Psychology, Psychobiology and Behavioral Sciences Methodology</p> <p>González-Manzano, Susana; University of Salamanca, Analytical Chemistry</p> <p>Rodriguez-Sanchez, Emiliano; Institute of Biomedical Research of Salamanca (IBSAL), Primary Health Care Research Unit, La Alamedilla Health Center. Health Service of Castilla y León (SACyL); University of Salamanca, Medicine</p> <p>Maderuelo-Fernandez, Jose; Institute of Biomedical Research of Salamanca (IBSAL), Primary Health Care Research Unit, La Alamedilla Health Center. Health Service of Castilla y León (SACyL)</p> <p>Recio-Rodriguez, Jose; Institute of Biomedical Research of Salamanca (IBSAL), Primary Health Care Research Unit, La Alamedilla Health Center. Health Service of Castilla y León (SACyL); University of Salamanca, Nursing and Physiotherapy</p> |

1  
2  
3  
4  
5  
6  
7  
8  
9  
10  
11  
12  
13  
14  
15  
16  
17  
18  
19  
20  
21  
22  
23  
24  
25  
26  
27  
28  
29  
30  
31  
32  
33  
34  
35  
36  
37  
38  
39  
40  
41  
42  
43  
44  
45  
46  
47  
48  
49  
50  
51  
52  
53  
54  
55  
56  
57  
58  
59  
60

|           |                                                                                                    |
|-----------|----------------------------------------------------------------------------------------------------|
| Keywords: | chocolate, postmenopause, arterial pressure, vascular stiffness, body composition, quality of life |
|           |                                                                                                    |

SCHOLARONE™  
Manuscripts

1  
2  
3  
4  
5  
6  
7  
8  
9  
10  
11  
12  
13  
14  
15  
16  
17  
18  
19  
20  
21  
22  
23  
24  
25  
26  
27  
28  
29  
30  
31  
32  
33  
34  
35  
36  
37  
38  
39  
40  
41  
42  
43  
44  
45  
46  
47  
48  
49  
50  
51  
52  
53  
54  
55  
56  
57  
58  
59  
60

1 **TITLE: The effect of adding chocolate with a high percentage of cocoa and**  
2 **polyphenols to a normal diet on blood pressure, vascular function, body**  
3 **composition, quality of life and cognitive performance in postmenopausal**  
4 **women. Randomized clinical trial. ECCAMP Study.**

5  
6 **AUTHORS:**

7 Irene A Garcia-Yu<sup>1,2</sup>, Luis Garcia-Ortiz<sup>1,3</sup>, Manuel A Gómez-Marcos<sup>1,4</sup>, Rosario Alonso-  
8 Dominguez<sup>1</sup>, Jesus Gonzalez-Sanchez<sup>1,5</sup>, Sara Mora-Simon<sup>1,6</sup>, Susana González-  
9 Manzano<sup>7</sup>, Emiliano Rodriguez-Sanchez<sup>1,4</sup>, Jose A Maderuelo-Fernandez<sup>1\*</sup>, Jose I  
10 Recio-Rodriguez<sup>1,8\*</sup>

11 1. Institute of Biomedical Research of Salamanca (IBSAL), Primary Health Care  
12 Research Unit, La Alamedilla Health Center. Health Service of Castilla y León  
13 (SACyL), Salamanca, Spain.

14 2. Public Health Information Service, Consejería de Sanidad, Junta de Castilla y León,  
15 Valladolid, Spain.

16 3. Department of Biomedical and Diagnostic Sciences, University of Salamanca,  
17 Salamanca, Spain.

18 4. Department of Medicine, University of Salamanca, Salamanca, Spain.

19 5. Department of Nursing, University of Extremadura, Plasencia, Spain.

20 6. Department of Basic Psychology, Psychobiology and Behavioral Sciences  
21 Methodology, University of Salamanca, Salamanca, Spain.

22 7. Department of Analytical Chemistry, University of Salamanca, Salamanca, Spain.

23 8. Department of Nursing and Physiotherapy, University of Salamanca, Salamanca,  
24 Spain.

25 \*These authors contributed equally to this work.

26 **CORRESPONDING AUTHOR:**

27 Irene A Garcia-Yu

28 Primary Care Research Unit, The Alamedilla Health Centre. 37003 Salamanca, Spain.

1  
2  
3  
4  
5  
6  
7  
8  
9  
10  
11  
12  
13  
14  
15  
16  
17  
18  
19  
20  
21  
22  
23  
24  
25  
26  
27  
28  
29  
30  
31  
32  
33  
34  
35  
36  
37  
38  
39  
40  
41  
42  
43  
44  
45  
46  
47  
48  
49  
50  
51  
52  
53  
54  
55  
56  
57  
58  
59  
60

29 ireneailinggarciayu@gmail.com

30 0034923231859

For peer review only

1  
2  
3 31 **ABSTRACT**

4 32 **Introduction:** The intake of polyphenols has shown certain health benefits. The aim of  
5  
6 33 this study is to assess the effect of adding a daily amount of chocolate high in cocoa  
7  
8 34 content and polyphenols to the normal diet on blood pressure, vascular function,  
9  
10 35 cognitive performance, quality of life and body composition in postmenopausal women.

11  
12 36 **Methods and analysis:** Randomized clinical trial with two parallel groups involving a  
13  
14 37 total of 140 women between 50 and 64 years of age in the postmenopausal period,  
15  
16 38 defined by amenorrhea of at least 12 consecutive months. The main variable will be the  
17  
18 39 change in blood pressure. Secondary variables will be changes in vascular function,  
19  
20 40 quality of life, cognitive performance and body composition. The intervention group will  
21  
22 41 be given chocolate containing 99% cocoa, with instructions to add 10 g daily to their  
23  
24 42 normal diet for 6 months. The daily nutritional contribution of this amount of chocolate  
25  
26 43 is 59 Kcal and 65.4 mg of polyphenols. There will be no intervention in the control  
27  
28 44 group. All variables will be measured at the baseline visit and at 3 and 6 months after  
29  
30 45 randomization, except cognitive performance and quality of life, to be assessed only at  
31  
32 46 baseline and at 6 months. Recruitment is scheduled to begin on June 1, 2018, and the  
33  
34 47 study will continue until May 31, 2019.

35  
36 48 **Ethics and dissemination:** This study was approved by the Clinical Research Ethics  
37  
38 49 Committee of the Health Area of Salamanca, Spain ("CREC of Health Area of  
39  
40 50 Salamanca") in February 2018. A SPIRIT checklist is available for this protocol. The  
41  
42 51 clinical trial has been registered at ClinicalTrials.gov provided by the US National  
43  
44 52 Library of Medicine, number NCT03492983.

45  
46 53 **Keywords:** Chocolate, postmenopause, arterial pressure, vascular stiffness, body  
47  
48 54 composition, quality of life.  
49

50 55

51 56  
52  
53  
54  
55  
56  
57  
58  
59  
60

1  
2  
3 57 **Strengths and limitations of this study:**

- 4  
5 58 - The effect of commercially available chocolate high in cocoa and polyphenols on  
6  
7 59 the health of postmenopausal women is not known since most of the available  
8  
9 60 studies have used laboratory compounds prepared with high composition of these  
10  
11 61 substances.  
12  
13 62 - Blood pressure and vascular function will be measured objectively using a  
14  
15 63 sphygmomanometer and a Vasera VS-2000 device (Fukuda Denshi), with body  
16  
17 64 composition measured by impedance analysis, while quality of life and cognitive  
18  
19 65 performance will be assessed using validated instruments.  
20  
21 66 - Due to the nature of the intervention, the participants cannot be blinded, although  
22  
23 67 the researchers who perform the measurements and the statistical analysis will be  
24  
25 68 blinded.  
26  
27  
28  
29  
30  
31  
32  
33  
34  
35  
36  
37  
38  
39  
40  
41  
42  
43  
44  
45  
46  
47  
48  
49  
50  
51  
52  
53  
54  
55  
56  
57  
58  
59  
60

## 69 INTRODUCTION

70 Polyphenols are bioactive compounds found in many plants, fruits and vegetables. The  
71 beneficial effects on human health associated with the consumption of a diet rich in  
72 polyphenols has generated great scientific interest in these substances <sup>1-3</sup>. The action  
73 of polyphenols is based on their antioxidant capacity through the uptake of free  
74 radicals, the chelation of metals with redox properties and the modulation and inhibition  
75 of enzymatic activity <sup>4</sup>.

76 The most abundant polyphenols in cocoa are flavonoids, which have been linked to a  
77 protective effect against cardiovascular disease, decreasing the risk of cardiovascular  
78 morbidity and mortality, and favouring the prevention of other chronic diseases such as  
79 diabetes mellitus type 2 <sup>1-3 5 6</sup>. The ability to reduce cardiovascular risk could be due to  
80 an improvement in the elements that define metabolic syndrome, the improvement of  
81 vascular endothelial dysfunction, insulin resistance and the inhibition of platelet  
82 activation and aggregation <sup>7 8</sup>.

83 **Cocoa polyphenols and blood pressure:** The effect of consuming polyphenols  
84 present in chocolate on the blood pressure (BP) statistics of healthy individuals is not  
85 clear. Some studies have observed a dose-dependent relationship between cocoa  
86 intake and clinical BP, with higher consumption equated to lower blood pressure and  
87 better vascular function <sup>9 10</sup>. Conversely, other research has not obtained significant  
88 changes in these parameters related to the supplementation of cocoa or pure  
89 polyphenols such as epicatechin or quercetin <sup>11 12</sup>.

90 Endothelial dysfunction in postmenopausal women causes changes that favour the  
91 development of cardiovascular risk factors and atherosclerosis, which lead to the  
92 appearance and maintenance of hypertension <sup>13 14</sup>. A decrease in BP has been  
93 observed in this group after daily consumption of cocoa with a flavonol content of 40.12  
94 mg. Below this level, however, no changes have been observed <sup>15</sup>.

95 **Cocoa polyphenols and vascular function:** Among healthy individuals as well as  
96 postmenopausal women, the consumption of polyphenols present in cocoa has been



1  
2  
3 97 associated with a dose-dependent improvement of vascular function, in particular of  
4 98 arterial stiffness measured by pulse wave speed<sup>9 10 15</sup>. However, this relationship is not  
5  
6 99 evident in people with mild hypertension when cardio-ankle vascular index (CAVI) is  
7  
8  
9 100 used as a measure of arterial stiffness<sup>16</sup>.

10  
11 101 There is also evidence of the influence of these polyphenols in reducing the  
12  
13 102 augmentation index (AIx). The study by West et al<sup>17</sup>, involving subjects with excess  
14  
15 103 weight and moderate obesity, concludes that the treatment with dark chocolate  
16  
17 104 decreases AIx in women, although it seems that this association may affect more the  
18  
19 105 elasticity of the large arteries, especially in subjects with obesity and diabetes mellitus  
20  
21 106 type 2<sup>18</sup>.

22  
23 107 **Cocoa polyphenols and cognitive performance:** There is evidence to suggest that  
24  
25 108 chocolate rich in polyphenols may be beneficial for cognitive performance and state  
26  
27 109 since it improves mental processing speed and attenuates the increase of mental  
28  
29 110 fatigue among healthy young adults<sup>19 20</sup>. An improvement in cognitive performance  
30  
31 111 among older age groups after eating chocolate has also been observed<sup>21</sup>. Several  
32  
33 112 studies also show that polyphenol-rich chocolate causes an improvement in executive  
34  
35 113 function and categorical fluency<sup>22</sup>, in working memory<sup>23 24</sup>, and a slowing of mental  
36  
37 114 fatigue<sup>25</sup>. Furthermore, a positive influence of cocoa polyphenols on physiological  
38  
39 115 processes has been reported, with a neuroprotective effect<sup>26</sup> and improved cognitive  
40  
41 116 performance<sup>27</sup>.

42  
43 117 **Cocoa polyphenols and quality of life:** The quality of life linked to health is  
44  
45 118 represented by the individual's perception of well-being in various aspects of life,  
46  
47 119 including physical and mental aspects. The effect of chocolate and polyphenols on the  
48  
49 120 quality of life has scarcely been studied, with not a great deal of evidence available and  
50  
51 121 even less of a conclusive nature. In a study conducted among healthy people, where  
52  
53 122 regular consumption of chocolate was recorded over a year, no evidence was found of  
54  
55 123 a clear association between chocolate intake and the physical or mental components of

1  
2  
3 124 quality of life <sup>28</sup>. Nevertheless, it has been observed that the consumption of dark  
4  
5 125 chocolate may be beneficial for the quality of life of women with fibromyalgia <sup>29</sup>.

6  
7 126 **Cocoa polyphenols and body composition:** The menopause period leads to various  
8  
9 127 changes in the body composition of women <sup>30</sup>. Regarding the connection between  
10  
11 128 cocoa polyphenols and body composition, results diverge. Some clinical trials involving  
12  
13 129 healthy people and overweight or obese patients have not reported significant  
14  
15 130 differences that link chocolate consumption to anthropometric measures <sup>12 16 17 31</sup>. Other  
16  
17 131 studies indicate that chocolate consumption may have positive effects on body  
18  
19 132 composition in adolescents <sup>32</sup>, patients with diabetes <sup>33</sup> or women with obesity <sup>34</sup>. Two  
20  
21 133 recent systematic reviews also indicate that eating chocolate is associated with  
22  
23 134 reduced body mass index (BMI) and waist circumference <sup>35 36</sup>, and one of them also  
24  
25 135 concludes that the amount and the length of time during which it is eaten play a key  
26  
27 136 role in these beneficial effects <sup>36</sup>. Conversely, other studies such as that carried out  
28  
29 137 with the cohort of the Atherosclerosis Risk in Communities (ARIC) study have observed  
30  
31 138 a dose-dependent increase in weight after habitual chocolate consumption <sup>37</sup>.

32  
33 139 In sum, the polyphenols present in chocolate seem to have a positive effect on BP,  
34  
35 140 vascular function, cognitive performance and quality of life, especially in populations  
36  
37 141 with increased cardiovascular risk such as postmenopausal women <sup>38</sup>. However, the  
38  
39 142 conflicting results obtained in different studies suggest that the real contribution of  
40  
41 143 these compounds to health and the underlying mechanisms remain unclear. Moreover,  
42  
43 144 most of these studies have used preparations with high concentrations of polyphenols  
44  
45 145 that are usually not present in the normal diet.

46  
47 146 This study aims to evaluate the effect of adding a daily amount of 10 g of chocolate  
48  
49 147 high in cocoa content (99%) and polyphenols to the normal diet on blood pressure,  
50  
51 148 vascular function, cognitive performance, quality of life and body composition in  
52  
53 149 postmenopausal women.

## 54 150 **METHODS AND ANALYSIS**

### 55 56 151 **Design and setting:**

1  
2  
3 152 This controlled and randomized clinical trial involves two parallel groups. The study will  
4  
5 153 be carried out in the Research Unit of the La Alamedilla Health Centre in Salamanca  
6  
7 154 (Spain), which is part of the Biomedical Research Institute of Salamanca (IBSAL) and  
8  
9 155 the Primary Care Prevention and Health Promotion Research Network (REDIAPP).  
10  
11 156 The recruitment schedule is set to start on June 1, 2018, and the study will run until  
12  
13 157 May 31, 2019. There will be a baseline assessment and two follow-ups, at 3 and 6  
14  
15 158 months.

16  
17 159 **Study population:**

18  
19 160 Those subjects who meet the selection criteria and sign the informed consent after  
20  
21 161 receiving information about the objectives and implementation of the study will take  
22  
23 162 part.

24  
25 163 Inclusion criteria: women between 50 and 64 years of age in postmenopause, defined  
26  
27 164 by and checked against amenorrhea during at least 12 consecutive months.

28  
29 165 Exclusion criteria: personal history of cardiovascular disease; personal history of  
30  
31 166 diabetes mellitus, arterial hypertension or dyslipidemia under pharmacological  
32  
33 167 treatment; hypocaloric diets; clinically demonstrable neurological and/or  
34  
35 168 neuropsychological disease; treatment with hormone replacement therapy; intolerance  
36  
37 169 and/or allergy to cocoa or any of the components of the supplement.

38  
39 170 Participants will be selected using a consecutive sample of women who meet the  
40  
41 171 selection criteria in the GP surgeries of four urban primary care centres in Salamanca,  
42  
43 172 from June 1, 2018.

44  
45 173 **Sample size:**

46  
47 174 The size of the sample has been estimated based on the potential modification of the  
48  
49 175 main variable, systolic blood pressure (SBP). Given alpha and beta risks of 0.05 and  
50  
51 176 0.20 respectively in bilateral contrast and a standard deviation (SD) of 5.8 mmHg, 140  
52  
53 177 participants (70 per group) will be necessary to detect a minimum difference of 2.9  
54  
55 178 mmHg in the SBP between the two groups. A predicted drop-out rate of 10% during  
56  
57 179 follow-up has been taken into account. This estimate has considered the results

1  
2  
3 180 obtained in a similar study in which a decrease in SBP of 6.5 was observed  $\pm$  5.8  
4  
5 181 mmHg<sup>10</sup>.

6  
7 182 **Randomization:**

8  
9 183 Participants will be assigned to the intervention group (IG) or control group (CG) at  
10  
11 184 random. The allocation sequence will be generated by an independent researcher  
12  
13 185 using the Epidat 4.2 program<sup>39</sup> and will remain hidden until the participants are  
14  
15 186 assigned to each group.

16  
17 187 **Intervention:**

18  
19 188 No type of intervention will be carried out with the CG participants.

20  
21 189 IG participants will be given chocolate with 99% cocoa content and asked to eat 10 g  
22  
23 190 daily for a period of 6 months. Participants will also be given instructions on eating and  
24  
25 191 keeping the product, with the recommendation, for example, that the daily chocolate  
26  
27 192 intake be eaten at the same time. In addition, they will be given a calendar on which to  
28  
29 193 record the time it was eaten each day. This calendar will be returned to the researchers  
30  
31 194 at each replenishment visit.

32  
33 195 This amount of chocolate provides the following daily nutritional contribution: 59 Kcal,  
34  
35 196 0.8 g of carbohydrates, 1.5 g of protein, 5.1 g of fat, of which 3.1 g are saturated fats.  
36  
37 197 The proportion of polyphenols per 10 g is 65.4 mg. The polyphenolic profile of this  
38  
39 198 compound can be seen in table 1. On each visit, IG participants will receive the amount  
40  
41 199 of chocolate they need until the next replenishment visit. In addition to the baseline  
42  
43 200 visit, there will be 5 replenishment visits in months 1, 2, 3 (coinciding with the  
44  
45 201 evaluation visit), 4 and 5. The sole purpose of the replenishment visits will be to supply  
46  
47 202 the amount of chocolate needed until the next visit, without any other intervention being  
48  
49 203 carried out.

50  
51 204 Participants in both groups will be instructed to continue with the dietary pattern they  
52  
53 205 usually follow, without changing their eating habits during the study period.

54  
55 206 **Procedures:**

1  
2  
3 207 For each participant a baseline visit and two follow-up visits at 3 and 6 months after the  
4  
5 208 initial one are scheduled (Figure 1). The IG will also make 5 replenishment visits, in  
6  
7 209 months 1, 2, 3 (coinciding with the first follow-up visit), 4 and 5. In the replenishment  
8  
9 210 visits they will be given the amount of chocolate needed until the next visit and will  
10  
11 211 hand in the calendar with the record of the chocolate eaten.

12 **Primary and secondary endpoints:**

13  
14 213 The primary variable will be the decrease in clinical BP, measured with a digital  
15  
16 214 sphygmomanometer. Secondary variables will include vascular function, quality of life,  
17  
18 215 cognitive performance and body composition.

19  
20 216 All variables will be measured at 3 and 6 months after randomization, except for  
21  
22 217 cognitive performance and quality of life, to be assessed only after 6 months.

23  
24 **Blood pressure:**

25  
26 219 Clinical systolic and diastolic blood pressure will be measured with a validated Omron  
27  
28 220 M10-IT sphygmomanometer (Omron Healthcare, Kyoto, Japan). Three measurements  
29  
30 221 will be taken in the dominant arm of the subject in a sitting position after at least 5  
31  
32 222 minutes of rest with an appropriately sized cuff, following the recommendations of the  
33  
34 223 European Society of Hypertension <sup>40</sup>. The average of the last two measurements will  
35  
36 224 be recorded.

37  
38 **Vascular function:**

39  
40 226 The Vasera VS-2000 device (Fukuda Denshi) will be used to measure the CAVI and  
41  
42 227 the brachial-ankle pulse wave velocity (ba-PWV) at rest. CAVI is a good indicator of  
43  
44 228 arterial stiffness, providing an accurate estimate of the degree of atherosclerosis  
45  
46 229 without depending on blood pressure <sup>41</sup>.  $CAVI \geq 9$  and  $ba-PWV \geq 18.3$  will be  
47  
48 230 considered pathological <sup>42</sup>. Pathological CAVI is representative of subclinical  
49  
50 231 atherosclerosis <sup>43</sup>.

51  
52 **Cognitive performance:**

53  
54 233 Attention and executive functions: Trail Making Test A will be used to measure  
55  
56 234 attention and Trail Making Test B for processing speed and executive functions <sup>44</sup>.

1  
2  
3 235 Immediate verbal memory will be assessed with the Rey Auditory Verbal Learning  
4 236 Test. The immediate recall of a list of 15 words is measured in three attempts, followed  
5  
6 237 by delayed verbal memory through the free recall of the words learned in the first part  
7  
8 238 of the test after 10 minutes <sup>45</sup>.

9  
10 239 Working memory will be assessed with the WAIS Digit Span Backward test <sup>46</sup>.

11  
12 240 Phonological fluency will be explored by naming as many words as possible starting  
13  
14 241 with different letters of the FAS Questionnaire in the space of one minute <sup>47</sup>.

15  
16 242 Categorical fluency measures verbal semantic fluency and will be assessed by naming  
17  
18 243 as many animals as possible in one minute <sup>48</sup>.

19  
20 244 **Quality of life:**

21  
22 245 The quality of life linked to health will be assessed through the EuroQol 5-D  
23  
24 246 questionnaire (EQ-5D). We will use the adapted Spanish version of this questionnaire,  
25  
26 247 which has been validated in the Spanish population <sup>49</sup>. This questionnaire consists of  
27  
28 248 three elements: the assessment by the individuals of their state of health in level of  
29  
30 249 severity by dimension (mobility, personal care, daily activities, pain/discomfort and  
31  
32 250 anxiety/depression), the assessment of their state of health on an analogue visual  
33  
34 251 scale, and finally an index of social values obtained for each state of health generated  
35  
36 252 by the instrument.

37  
38 253 The quality of life will also be studied using the Cervantes Scale <sup>50</sup>. This questionnaire  
39  
40 254 is specifically designed for menopause and postmenopause and has been validated for  
41  
42 255 Spanish women. Its 31 structured items cover the 4 dimensions of menopause:  
43  
44 256 menopause and health, sexuality, psychic domain and relationships.

45  
46 257 **Body composition:**

47  
48 258 Body composition will be measured with the Inbody 230 Monitor <sup>51</sup>. This analyzer  
49  
50 259 provides data on skeletal muscle mass, fat mass, total body water, fat-free mass,  
51  
52 260 percentage of body fat, waist-hip ratio, basal metabolism, and also a segmental  
53  
54 261 analysis.

1  
2  
3 262 Body weight will be measured twice with an electronic scale (Scale 7830, Soehnle  
4  
5 263 Professional GmbH & Co, Backnang, Germany) after proper calibration (accuracy  $\pm 0.1$   
6  
7 264 kg). Height will be measured by recording the average of two readings rounded to the  
8  
9 265 nearest centimetre using a stadiometer (Seca 222, Medical scale and measurement  
10  
11 266 system, Birmingham, UK). Both measurements will be made with the subject barefoot  
12  
13 267 and wearing light clothing. Body mass index will be calculated by dividing weight (kg)  
14  
15 268 by height squared ( $m^2$ ). Waist circumference will be assessed in accordance with the  
16  
17 269 recommendations of the Spanish Society for the Study of Obesity (SEEDO)<sup>52</sup> and will  
18  
19 270 be measured in duplicate before and after inhalation, using a flexible tape parallel to  
20  
21 271 the floor, at the level of the mid-point between the lowest rib and the iliac crest, with the  
22  
23 272 subject standing up and without clothes.

### 273 **Other variables**

#### 274 **Clinical and sociodemographic variables**

275 At the baseline visit, information on clinical and sociodemographic variables will also be  
276 collected via questions about age, marital status, educational level and occupation.  
277 Family history of cardiovascular disease and personal history of anxiety and/or  
278 depression, gestational diabetes, hypertension, dyslipidemia and the prescribed  
279 pharmacological treatment (antiaggregants, anticoagulants, thyroid hormone treatment,  
280 anxiolytics) will also be recorded, as well as the taking of NSAIDs in the last two weeks.  
281 In subsequent visits, personal histories of cardiovascular disease, diabetes mellitus,  
282 arterial hypertension or dyslipidemia in treatment, as well as the prescribed  
283 pharmacological treatment (hypolipidemic, antihypertensive, antidiabetic) will also be  
284 noted.

#### 285 **Evaluation of chocolate consumption and habitual diet**

286 Chocolate consumption will be assessed at each evaluation visit by a series of  
287 questions about the amount, type and frequency of consumption in the period between  
288 visits.

1  
2  
3 289 Nutritional habits will be assessed by a 24-hour log on 3 non-consecutive days prior to  
4  
5 290 each visit.

### 6 291 **Evaluation of other lifestyles**

7  
8 292 The use of tobacco will be assessed with a questionnaire on the personal history and  
9  
10 293 pattern of smoking.

11  
12 294 Alcohol use will be recorded with a questionnaire covering the previous 7 days which  
13  
14 295 will include specific beverages and the amount by volume drunk of each.

15  
16 296 Physical activity will be measured using the International Physical Activity  
17  
18 297 Questionnaire (IPAQ) in its short version and validated in Spanish<sup>53</sup>. This  
19  
20 298 questionnaire measures activity over the previous 7 days, classifying the subjects  
21  
22 299 according to three activity levels (low, moderate and high) with respect to three types of  
23  
24 300 activities: walking, moderate-intensity activities and vigorous-intensity activities. The  
25  
26 301 amount of physical exercise will be estimated in METs-minute/week.

### 27 302 **Evaluation of laboratory variables**

28  
29 303 At baseline and follow-up visits at 6 months, we will measure plasma fasting glucose  
30  
31 304 values (mg/dL), glycated haemoglobin (%), total cholesterol (mg/dL), total triglycerides  
32  
33 305 (mg/dL), HDL cholesterol (mg/dL), LDL cholesterol (mg/dL), creatinine (mg/L),  
34  
35 306 insulinemia (mg/dL). Creatinine in urine (mg/dL) and microalbuminuria (mg/dL) will also  
36  
37 307 be measured.

38  
39 308 Insulin resistance will be determined using the HOMA index (Homeostasis Model  
40  
41 309 Assessment Insulin Resistance) estimated using the following equation: Fasting  
42  
43 310 glucose (mmol/l) X insulin (mU/ml)/22.5.

### 44 311 **Blinding strategy:**

45  
46 312 Due to the nature of the intervention itself, the participants and the person responsible  
47  
48 313 for delivering the chocolate to IG participants, cannot be blinded. However, the person  
49  
50 314 responsible for carrying out the study measurements at each visit and for the statistical  
51  
52 315 analysis will be blind to the intervention.



1  
2  
3 316 **Statistical analysis:**

4  
5 317 **General analysis**

6  
7 318 Results for the quantitative variables will be expressed by mean  $\pm$  standard deviation or  
8  
9 319 by frequency distribution in the case of qualitative ones. The normality of the variables  
10  
11 320 will be assessed using the Kolmogorov-Smirnov test. In cases where a normal  
12  
13 321 distribution cannot be assumed, the corresponding nonparametric tests will be applied.  
14  
15 322 The association between independent qualitative variables will be analyzed by means  
16  
17 323 of the chi-square test or Fisher's exact test. The means between the two groups will be  
18  
19 324 compared using the Student's t test or the Mann-Whitney U test, and the Pearson or  
20  
21 325 Spearman correlation coefficients will be calculated to analyze the relationship between  
22  
23 326 quantitative variables.

24  
25 327 The analysis of the results for the main variable and the secondary variables will be  
26  
27 328 carried out by intention to treat. In addition, a secondary analysis will be run taking into  
28  
29 329 account chocolate intake adherence (< 50% days and > 50% days) and other relevant  
30  
31 330 subgroups in relation to their physical activity or previous chocolate consumption.

32  
33 331 All analyses will be performed with the SPSS version 23.0 (IBM Corporation, Armonk,  
34  
35 332 NY, USA) and an alpha risk of 0.05 will be set as the limit of statistical significance.

36  
37 333 **Analysis of the intervention's effect on primary and secondary outcomes.**

38  
39 334 To analyze the changes at 3 and 6 months from baseline in the primary outcome  
40  
41 335 (blood pressure) and in the secondary outcomes within the same group, the Student's t  
42  
43 336 test for paired data or the Wilcoxon test will be used. The McNemar test will be applied  
44  
45 337 with quantitative or dichotomous variables.

46  
47 338 Effects of the intervention will be analyzed in a comparison of the changes in blood  
48  
49 339 pressure and the secondary variables between the IG and the CG, using ANCOVA and  
50  
51 340 adjusting for possible confounders. Effects of the intervention during follow-up will be  
52  
53 341 studied with an analysis of the variance of repeated measures.

54  
55 342 **Analysis by subgroups.**

1  
2  
3 343 The effect of the intervention could be influenced by age, sociocultural level and  
4 344 adherence to the study's chocolate intake. The same analyses described above will be  
5  
6 345 performed for each of the aforementioned subgroups.  
7

8  
9 346 **Secondary analyses.**

10 347 A multivariate multiple regression analysis will be performed to identify the variables  
11  
12 348 with the greatest influence on blood pressure changes and the secondary variables  
13  
14 349 analyzed.  
15

16  
17 350 **Methodological limitations:**

18 351 Due to the nature of the intervention, the participating subjects cannot be blinded.  
19  
20 352 However, the researcher who analyses the data and the person who makes the  
21  
22 353 measurements during follow-up visits will be blinded with respect to the group to which  
23  
24 354 the participants belong.  
25

26 355 Assessment of the quality of life and lifestyles will be carried out through self-reported  
27  
28 356 data; however, previously validated instruments will be used to obtain these. To make  
29  
30 357 compliance with the intervention in the IG easier, IG participants will be provided with  
31  
32 358 instructions on eating the chocolate and a calendar to record each intake.  
33

34 359 **ETHICS AND DISSEMINATION**

35  
36 360 **Ethical considerations:**

37  
38 361 The study was approved by the Clinical Research Ethics Committee of the Salamanca  
39  
40 362 Health Area ("CREC of Health Area of Salamanca") in February 2018. A SPIRIT  
41  
42 363 checklist is available for this protocol. The clinical trial has been registered at  
43  
44 364 ClinicalTrials.gov with the identifier NCT03492983.  
45

46 365 Participants must sign informed consent in accordance with the Declaration of Helsinki.  
47  
48 366 Subjects will be informed of the objectives of the project and the risks and benefits of  
49  
50 367 the explorations to be carried out, including sample collection. None of the tests will  
51  
52 368 pose risks that could endanger the lives of participants. Confidentiality of participant  
53  
54 369 data will be guaranteed at all times in accordance with the provisions of the Organic  
55  
56  
57  
58  
59  
60

1  
2  
3 370 Law on the Protection of Personal Data (15/1999 of December 13, LOPD), and under  
4  
5 371 the conditions established by Law 14/2007 of biomedical research.

6  
7 372 **Dissemination plan:**

8  
9 373 The research group plans to achieve rapid and widespread dissemination of results to  
10  
11 374 ensure maximum visibility of this study. To this end, the results of the study will be  
12  
13 375 published in scientific journals with peer review. At least one publication of the main  
14  
15 376 results and others with the secondary results are planned. This will be complemented  
16  
17 377 by presentation of the results of the study at relevant scientific conferences and  
18  
19 378 seminars of national and international scope. In addition, a doctoral thesis based on  
20  
21 379 this project will be prepared. Appropriate dissemination will likewise be carried out  
22  
23 380 through social networks and other media. Moreover, given the involvement of a  
24  
25 381 commercial product, the transfer to clinical practice is expected to be very fast if the  
26  
27 382 results are as expected.

28  
29 383 **DISCUSSION**

30  
31 384 In recent years, there has been an increase in attention to polyphenols and their  
32  
33 385 beneficial effects on health, with numerous studies being carried out to assess this <sup>15 17</sup>.  
34  
35 386 Similarly, the therapeutic use of these compounds has been suggested for certain  
36  
37 387 diseases or population groups <sup>29 54</sup>. The menopause increases the risk of developing  
38  
39 388 cardiovascular disease compared to the previous period <sup>38</sup>. However, we have not  
40  
41 389 found any study that assesses the effect of adding commercially available chocolate  
42  
43 390 high in cocoa content to the usual diet in this population at special risk. Similarly, no  
44  
45 391 studies have been found that evaluate the effects on cognitive performance, quality of  
46  
47 392 life and body composition of adding commercial chocolate with high cocoa content to  
48  
49 393 the usual diet in postmenopausal women.

50  
51 394 The results of this work will provide new evidence in this regard for the development of  
52  
53 395 strategies in nutritional education of particularly vulnerable populations, given their high  
54  
55 396 risk of developing cardiovascular disease, including non-pharmacological therapies and  
56  
57 397 strategies that employ lifestyle modification. This intervention may also have

1  
2  
3 398 implications for the preparation of recommendations in clinical practice guidelines and  
4  
5 399 quality improvement programs aimed at the care of postmenopausal women.  
6  
7  
8  
9  
10  
11  
12  
13  
14  
15  
16  
17  
18  
19  
20  
21  
22  
23  
24  
25  
26  
27  
28  
29  
30  
31  
32  
33  
34  
35  
36  
37  
38  
39  
40  
41  
42  
43  
44  
45  
46  
47  
48  
49  
50  
51  
52  
53  
54  
55  
56  
57  
58  
59  
60

For peer review only

## 400 REFERENCES

- 401 1. Grassi D, Desideri G, Ferri C. Flavonoids: antioxidants against atherosclerosis. *Nutrients*  
402 2010;2(8):889-902. doi: 10.3390/nu2080889 [published Online First: 2010/08/01]
- 403 2. Grassi D, Desideri G, Croce G, et al. Flavonoids, vascular function and cardiovascular  
404 protection. *Curr Pharm Des* 2009;15(10):1072-84. [published Online First: 2009/04/10]
- 405 3. Visioli F, Bernaert H, Corti R, et al. Chocolate, lifestyle, and health. *Crit Rev Food Sci Nutr*  
406 2009;49(4):299-312. doi: 10.1080/10408390802066805 [published Online First:  
407 2009/02/24]
- 408 4. Cos P, De Bruyne T, Hermans N, et al. Proanthocyanidins in health care: current and new  
409 trends. *Curr Med Chem* 2004;11(10):1345-59. [published Online First: 2004/05/12]
- 410 5. Grassi D, Desideri G, Ferri C. Blood pressure and cardiovascular risk: what about cocoa and  
411 chocolate? *Arch Biochem Biophys* 2010;501(1):112-5. doi: 10.1016/j.abb.2010.05.020  
412 [published Online First: 2010/05/25]
- 413 6. Ramos S, Martin MA, Goya L. Effects of Cocoa Antioxidants in Type 2 Diabetes Mellitus.  
414 *Antioxidants (Basel)* 2017;6(4) doi: 10.3390/antiox6040084 [published Online First:  
415 2017/11/01]
- 416 7. Osakabe N. Flavan 3-ols improve metabolic syndrome risk factors: evidence and  
417 mechanisms. *J Clin Biochem Nutr* 2013;52(3):186-92. doi: 10.3164/jcbrn.12-130  
418 [published Online First: 2013/05/25]
- 419 8. Engler MB, Engler MM, Chen CY, et al. Flavonoid-rich dark chocolate improves endothelial  
420 function and increases plasma epicatechin concentrations in healthy adults. *J Am Coll*  
421 *Nutr* 2004;23(3):197-204. [published Online First: 2004/06/11]
- 422 9. Heiss C, Sansone R, Karimi H, et al. Impact of cocoa flavanol intake on age-dependent  
423 vascular stiffness in healthy men: a randomized, controlled, double-masked trial. *Age*  
424 *(Dordr)* 2015;37(3):9794. doi: 10.1007/s11357-015-9794-9 [published Online First:  
425 2015/05/28]
- 426 10. Grassi D, Desideri G, Necozione S, et al. Cocoa consumption dose-dependently improves  
427 flow-mediated dilation and arterial stiffness decreasing blood pressure in healthy  
428 individuals. *J Hypertens* 2015;33(2):294-303. doi: 10.1097/hjh.0000000000000412  
429 [published Online First: 2014/11/08]
- 430 11. Crews WD, Jr., Harrison DW, Wright JW. A double-blind, placebo-controlled, randomized  
431 trial of the effects of dark chocolate and cocoa on variables associated with  
432 neuropsychological functioning and cardiovascular health: clinical findings from a  
433 sample of healthy, cognitively intact older adults. *Am J Clin Nutr* 2008;87(4):872-80.  
434 [published Online First: 2008/04/11]
- 435 12. Dower JI, Geleijnse JM, Gijsbers L, et al. Effects of the pure flavonoids epicatechin and  
436 quercetin on vascular function and cardiometabolic health: a randomized, double-  
437 blind, placebo-controlled, crossover trial. *Am J Clin Nutr* 2015;101(5):914-21. doi:  
438 10.3945/ajcn.114.098590 [published Online First: 2015/05/03]
- 439 13. Modena MG. Hypertension in postmenopausal women: how to approach hypertension in  
440 menopause. *High Blood Press Cardiovasc Prev* 2014;21(3):201-4. doi: 10.1007/s40292-  
441 014-0057-0 [published Online First: 2014/05/24]
- 442 14. Zilberman JM, Cerezo GH, Del Sueldo M, et al. Association Between Hypertension,  
443 Menopause, and Cognition in Women. *J Clin Hypertens (Greenwich)* 2015;17(12):970-  
444 6. doi: 10.1111/jch.12643 [published Online First: 2015/08/08]
- 445 15. Okamoto T, Kobayashi R, Natsume M, et al. Habitual cocoa intake reduces arterial stiffness  
446 in postmenopausal women regardless of intake frequency: a randomized parallel-  
447 group study. *Clin Interv Aging* 2016;11:1645-52. doi: 10.2147/cia.s118152 [published  
448 Online First: 2016/11/25]

- 1  
2  
3 449 16. Koli R, Kohler K, Tonteri E, et al. Dark chocolate and reduced snack consumption in mildly  
4 450 hypertensive adults: an intervention study. *Nutr J* 2015;14:84. doi: 10.1186/s12937-  
5 451 015-0075-3 [published Online First: 2015/08/25]  
6 452 17. West SG, McIntyre MD, Piotrowski MJ, et al. Effects of dark chocolate and cocoa  
7 453 consumption on endothelial function and arterial stiffness in overweight adults. *Br J*  
8 454 *Nutr* 2014;111(4):653-61. doi: 10.1017/s0007114513002912 [published Online First:  
9 455 2013/11/28]  
10 456 18. Basu A, Betts NM, Leyva MJ, et al. Acute Cocoa Supplementation Increases Postprandial  
11 457 HDL Cholesterol and Insulin in Obese Adults with Type 2 Diabetes after Consumption  
12 458 of a High-Fat Breakfast. *J Nutr* 2015;145(10):2325-32. doi: 10.3945/jn.115.215772  
13 459 [published Online First: 2015/09/05]  
14 460 19. Scholey AB, French SJ, Morris PJ, et al. Consumption of cocoa flavanols results in acute  
15 461 improvements in mood and cognitive performance during sustained mental effort. *J*  
16 462 *Psychopharmacol* 2010;24(10):1505-14. doi: 10.1177/0269881109106923 [published  
17 463 Online First: 2009/11/28]  
18 464 20. Field DT, Williams CM, Butler LT. Consumption of cocoa flavanols results in an acute  
19 465 improvement in visual and cognitive functions. *Physiol Behav* 2011;103(3-4):255-60.  
20 466 doi: 10.1016/j.physbeh.2011.02.013 [published Online First: 2011/02/18]  
21 467 21. Sorond FA, Hurwitz S, Salat DH, et al. Neurovascular coupling, cerebral white matter  
22 468 integrity, and response to cocoa in older people. *Neurology* 2013;81(10):904-9. doi:  
23 469 10.1212/WNL.0b013e3182a351aa [published Online First: 2013/08/09]  
24 470 22. Mastroiacovo D, Kwik-Uribe C, Grassi D, et al. Cocoa flavanol consumption improves  
25 471 cognitive function, blood pressure control, and metabolic profile in elderly subjects:  
26 472 the Cocoa, Cognition, and Aging (CoCoA) Study--a randomized controlled trial. *Am J*  
27 473 *Clin Nutr* 2015;101(3):538-48. doi: 10.3945/ajcn.114.092189 [published Online First:  
28 474 2015/03/04]  
29 475 23. Grassi D, Soggi V, Tempesta D, et al. Flavanol-rich chocolate acutely improves arterial  
30 476 function and working memory performance counteracting the effects of sleep  
31 477 deprivation in healthy individuals. *J Hypertens* 2016;34(7):1298-308. doi:  
32 478 10.1097/hjh.0000000000000926 [published Online First: 2016/04/19]  
33 479 24. Crichton GE, Elias MF, Alkerwi A. Chocolate intake is associated with better cognitive  
34 480 function: The Maine-Syracuse Longitudinal Study. *Appetite* 2016;100:126-32. doi:  
35 481 10.1016/j.appet.2016.02.010 [published Online First: 2016/02/14]  
36 482 25. Masee LA, Ried K, Pase M, et al. The acute and sub-chronic effects of cocoa flavanols on  
37 483 mood, cognitive and cardiovascular health in young healthy adults: a randomized,  
38 484 controlled trial. *Front Pharmacol* 2015;6:93. doi: 10.3389/fphar.2015.00093 [published  
39 485 Online First: 2015/06/05]  
40 486 26. Nehlig A. The neuroprotective effects of cocoa flavanol and its influence on cognitive  
41 487 performance. *Br J Clin Pharmacol* 2013;75(3):716-27. doi: 10.1111/j.1365-  
42 488 2125.2012.04378.x [published Online First: 2012/07/11]  
43 489 27. Nurk E, Refsum H, Drewnon CA, et al. Intake of flavonoid-rich wine, tea, and chocolate by  
44 490 elderly men and women is associated with better cognitive test performance. *J Nutr*  
45 491 2009;139(1):120-7. doi: 10.3945/jn.108.095182 [published Online First: 2008/12/06]  
46 492 28. Balboa-Castillo T, Lopez-Garcia E, Leon-Munoz LM, et al. Chocolate and health-related  
47 493 quality of life: a prospective study. *PLoS One* 2015;10(4):e0123161. doi:  
48 494 10.1371/journal.pone.0123161 [published Online First: 2015/04/23]  
49 495 29. Costa de Miranda R, Paiva ES, Suter Correia Cadena SM, et al. Polyphenol-Rich Foods  
50 496 Alleviate Pain and Ameliorate Quality of Life in Fibromyalgic Women. *Int J Vitam Nutr*  
51 497 *Res* 2016;1-10. doi: 10.1024/0300-9831/a000253 [published Online First: 2016/11/22]  
52 498 30. Dmitruk A, Czezelewski J, Czezelewska E, et al. Body composition and fatty tissue  
53 499 distribution in women with various menstrual status. *Rocz Panstw Zakl Hig*  
54 500 2018;69(1):95-101. [published Online First: 2018/03/10]

- 1  
2  
3 501 31. Davison K, Coates AM, Buckley JD, et al. Effect of cocoa flavanols and exercise on  
4 502 cardiometabolic risk factors in overweight and obese subjects. *Int J Obes (Lond)*  
5 503 2008;32(8):1289-96. doi: 10.1038/ijo.2008.66 [published Online First: 2008/05/28]  
6 504 32. Cuenca-Garcia M, Ruiz JR, Ortega FB, et al. Association between chocolate consumption  
7 505 and fatness in European adolescents. *Nutrition* 2014;30(2):236-9. doi:  
8 506 10.1016/j.nut.2013.07.011 [published Online First: 2013/10/22]  
9 507 33. Ayoobi N, Jafarirad S, Haghhighizadeh MH, et al. Protective Effect of Dark Chocolate on  
10 508 Cardiovascular Disease Factors and Body Composition in Type 2 Diabetes: A Parallel,  
11 509 Randomized, Clinical Trial. *Iran Red Crescent Med J* 2017;19(8):e21644. doi:  
12 510 10.5812/ircmj.21644 [published Online First: 2017-08-01]  
13 511 34. Di Renzo L, Rizzo M, Sarlo F, et al. Effects of dark chocolate in a population of normal  
14 512 weight obese women: a pilot study. *Eur Rev Med Pharmacol Sci* 2013;17(16):2257-66.  
15 513 [published Online First: 2013/07/31]  
16 514 35. González-Sarrías A, Combet E, Pinto P, et al. A Systematic Review and Meta-Analysis of the  
17 515 Effects of Flavanol-Containing Tea, Cocoa and Apple Products on Body Composition  
18 516 and Blood Lipids: Exploring the Factors Responsible for Variability in Their Efficacy.  
19 517 *Nutrients* 2017;9(7):746.  
20 518 36. Kord-Varkaneh H, Ghaedi E, Nazary-Vanani A, et al. Does cocoa/dark chocolate  
21 519 supplementation have favorable effect on body weight, body mass index and waist  
22 520 circumference? A systematic review, meta-analysis and dose-response of randomized  
23 521 clinical trials. *Crit Rev Food Sci Nutr* 2018:0. doi: 10.1080/10408398.2018.1451820  
24 522 [published Online First: 2018/03/20]  
25 523 37. Greenberg JA, Buijsse B. Habitual chocolate consumption may increase body weight in a  
26 524 dose-response manner. *PLoS One* 2013;8(8):e70271. doi:  
27 525 10.1371/journal.pone.0070271 [published Online First: 2013/08/21]  
28 526 38. Agrinier N, Cournot M, Dallongeville J, et al. Menopause and modifiable coronary heart  
29 527 disease risk factors: a population based study. *Maturitas* 2010;65(3):237-43. doi:  
30 528 10.1016/j.maturitas.2009.11.023 [published Online First: 2009/12/25]  
31 529 39. Consellería de Sanidade Xunta de Galicia. Spain; Pan American Organization health (PAHO-  
32 530 WHO); CES University C. Epidat: program for epidemiological data analysis. Version  
33 531 4.2 Julio 2016.  
34  
35  
36 532 40. 2013 Practice guidelines for the management of arterial hypertension of the European  
37 533 Society of Hypertension (ESH) and the European Society of Cardiology (ESC): ESH/ESC  
38 534 Task Force for the Management of Arterial Hypertension. *J Hypertens*  
39 535 2013;31(10):1925-38. doi: 10.1097/HJH.0b013e328364ca4c [published Online First:  
40 536 2013/10/11]  
41 537 41. Shirai K, Hiruta N, Song M, et al. Cardio-ankle vascular index (CAVI) as a novel indicator of  
42 538 arterial stiffness: theory, evidence and perspectives. *J Atheroscler Thromb*  
43 539 2011;18(11):924-38. [published Online First: 2011/06/02]  
44 540 42. Ohkuma T, Tomiyama H, Ninomiya T, et al. Proposed Cutoff Value of Brachial-Ankle Pulse  
45 541 Wave Velocity for the Management of Hypertension. *Circ J* 2017;81(10):1540-42. doi:  
46 542 10.1253/circj.CJ-17-0636 [published Online First: 2017/08/25]  
47 543 43. Korkmaz L, Erkan H, Korkmaz AA, et al. Relationship of aortic knob width with cardio-ankle  
48 544 vascular stiffness index and its value in diagnosis of subclinical atherosclerosis in  
49 545 hypertensive patients: a study on diagnostic accuracy. *Anadolu Kardiyol Derg*  
50 546 2012;12(2):102-6. doi: 10.5152/akd.2012.034 [published Online First: 2012/01/28]  
51 547 44. Reitan RM. Trail Making Test. Tucson: Reitan Neuropsychology Laboratory 1992.  
52 548 45. Rey A. L'examen clinique en psychologie. Paris: Presses universitaires de France 1964.  
53 549 46. Wechsler D. WMS-R Wechsler memory scale. San Antonio, Texas: The Psychological  
54 550 Corporation 1987.  
55  
56  
57  
58  
59  
60

- 1  
2  
3 551 47. Valencia NJ, Laserna, J. A., Pérez-García, M., Orozco, C., Miñán, M., Garrido, C., Morente, G.  
4 552 Influencia de la escolaridad y el sexo sobre la ejecución en el FAS, nombrar animales y  
5 553 nombrar frutas. *Psicología Conductual* 2000;8(2):283-95.  
6 554 48. Goodglass H KE. Evaluación de la Afasia y de Trastornos Relacionados 1986.  
7 555 49. Badia X, Schiaffino A, Alonso J, et al. Using the EuroQol 5-D in the Catalan general  
8 556 population: feasibility and construct validity. *Qual Life Res* 1998;7(4):311-22.  
9 557 [published Online First: 1998/06/04]  
10 558 50. Palacios S, Ferrer-Barriendos J, Parrilla JJ, et al. [Health-related quality of life in the Spanish  
11 559 women through and beyond menopause. Development and validation of the  
12 560 Cervantes Scale]. *Med Clin (Barc)* 2004;122(6):205-11. [published Online First:  
13 561 2004/03/12]  
14 562 51. Karelis AD, Chamberland G, Aubertin-Leheudre M, et al. Validation of a portable  
15 563 bioelectrical impedance analyzer for the assessment of body composition. *Appl Physiol*  
16 564 *Nutr Metab* 2013;38(1):27-32. doi: 10.1139/apnm-2012-0129 [published Online First:  
17 565 2013/02/02]  
18 566 52. Salas-Salvado J, Rubio MA, Barbany M, et al. [SEEDO 2007 Consensus for the evaluation of  
19 567 overweight and obesity and the establishment of therapeutic intervention criteria].  
20 568 *Med Clin (Barc)* 2007;128(5):184-96; quiz 1 p following 200. [published Online First:  
21 569 2007/02/15]  
22 570 53. Roman Vinas B, Ribas Barba L, Ngo J, et al. [Validity of the international physical activity  
23 571 questionnaire in the Catalan population (Spain)]. *Gac Sanit* 2013;27(3):254-7. doi:  
24 572 10.1016/j.gaceta.2012.05.013 [published Online First: 2012/10/30]  
25 573 54. Islam MA, Alam F, Solayman M, et al. Dietary Phytochemicals: Natural Swords Combating  
26 574 Inflammation and Oxidation-Mediated Degenerative Diseases. *Oxid Med Cell Longev*  
27 575 2016;2016:5137431. doi: 10.1155/2016/5137431 [published Online First: 2016/10/11]  
28  
29  
30

31 577 **AUTHORS' CONTRIBUTIONS:**

32  
33 578 JIR, JAM, LGO and IGY contributed to the conception and design of the study. IGY,  
34  
35 579 JIR and JAM prepared the manuscript of the study protocol. JIR, JAM, LGO, RAD,  
36  
37 580 SMS, JGS, SMG, ERS, MGM and IGY contributed to the development of the study  
38  
39 581 protocol. JIR, JAM, LGO, RAD, SMS, JGS, SMG, ERS, MGM and IGY provided  
40  
41 582 assistance with statistical methodology and knowledge. JIR, JAM, LGO, RAD, SMS,  
42  
43 583 JGS, SMG, ERS, MGM and IGY provided a critical review of the manuscript.  
44  
45 584 All authors have read and accepted the final version of the protocol.  
46

47 585 **FUNDING STATEMENT:**

48  
49 586 This study was supported in part by grants funded by la Gerencia Regional de Castilla  
50  
51 587 y León (GRS 1583/B/17).  
52  
53  
54  
55  
56  
57  
58  
59  
60



1  
2  
3 588 “Lindt & Sprüngli will provide the necessary chocolate for the implementation of the  
4  
5 589 study. This company will not play any role in the design of the study, data analysis,  
6  
7 590 reporting of results, or the decision to present the manuscript for publication”.

8  
9 591 **COMPETING INTERESTS STATEMENT:**

10 592 The authors declare that they have no conflicts of interest.

11  
12 593 **ACKNOWLEDGMENTS:**

13  
14 594 The authors are grateful to all the professionals involved in the ECCAMP study:

15  
16 595 José I Recio-Rodríguez, José A Maderuelo-Fernández, Luis García-Ortiz, Manuel A  
17  
18 596 Gómez-Marcos, Irene A García-Yu, Rosario Alonso-Domínguez, Sara Mora-Simón,  
19  
20 597 Natalia Sánchez-Aguadero, Jesús González-Sánchez, Cristina Agudo-Conde, Cristina  
21  
22 598 Lugones-Sánchez, Benigna Sánchez-Salgado, Carmen Castaño-Sánchez, Emiliano  
23  
24 599 Rodríguez-Sánchez, Susana González-Manzano, Olaya Tamayo-Morales, Susana  
25  
26 600 González-Sánchez.

27  
28 601 **FIGURE LEGEND:**

29  
30 602 Figure 1. Study flow chart

31  
32 603 Table 1. Polyphenol composition of 99% cocoa chocolate

33  
34 604  
35  
36  
37  
38  
39  
40  
41  
42  
43  
44  
45  
46  
47  
48  
49  
50  
51  
52  
53  
54  
55  
56  
57  
58  
59  
60

605 **Table 1.** Polyphenols composition of 99% cocoa chocolate.

| Compounds                      | Quantity      |
|--------------------------------|---------------|
| Protocatechuic acid (mg/g)     | 0.058 ± 0.008 |
| Procyanidin dimer (B3) (mg/g)  | 0.176 ± 0.013 |
| Catechin (mg/g)                | 1.035 ± 0.105 |
| Procyanidin dimer (B2) (mg/g)  | 1.440 ± 0.055 |
| Epicatechin (mg/g)             | 2.610 ± 0.075 |
| Procyanidin trimer (C1) (mg/g) | 0.853 ± 0.024 |
| Procyanidin A hexoside (mg/g)  | 0.354 ± 0.007 |
| Quercetin glucoside (mg/g)     | 0.002 ± 0.000 |
| Quercetin arabinoside (mg/g)   | 0.003 ± 0.001 |

606

1  
2  
3  
4  
5  
6  
7  
8  
9  
10  
11  
12  
13  
14  
15  
16  
17  
18  
19  
20  
21  
22  
23  
24  
25  
26  
27  
28  
29  
30  
31  
32  
33  
34  
35  
36  
37  
38  
39  
40  
41  
42  
43  
44  
45  
46  
47  
48  
49

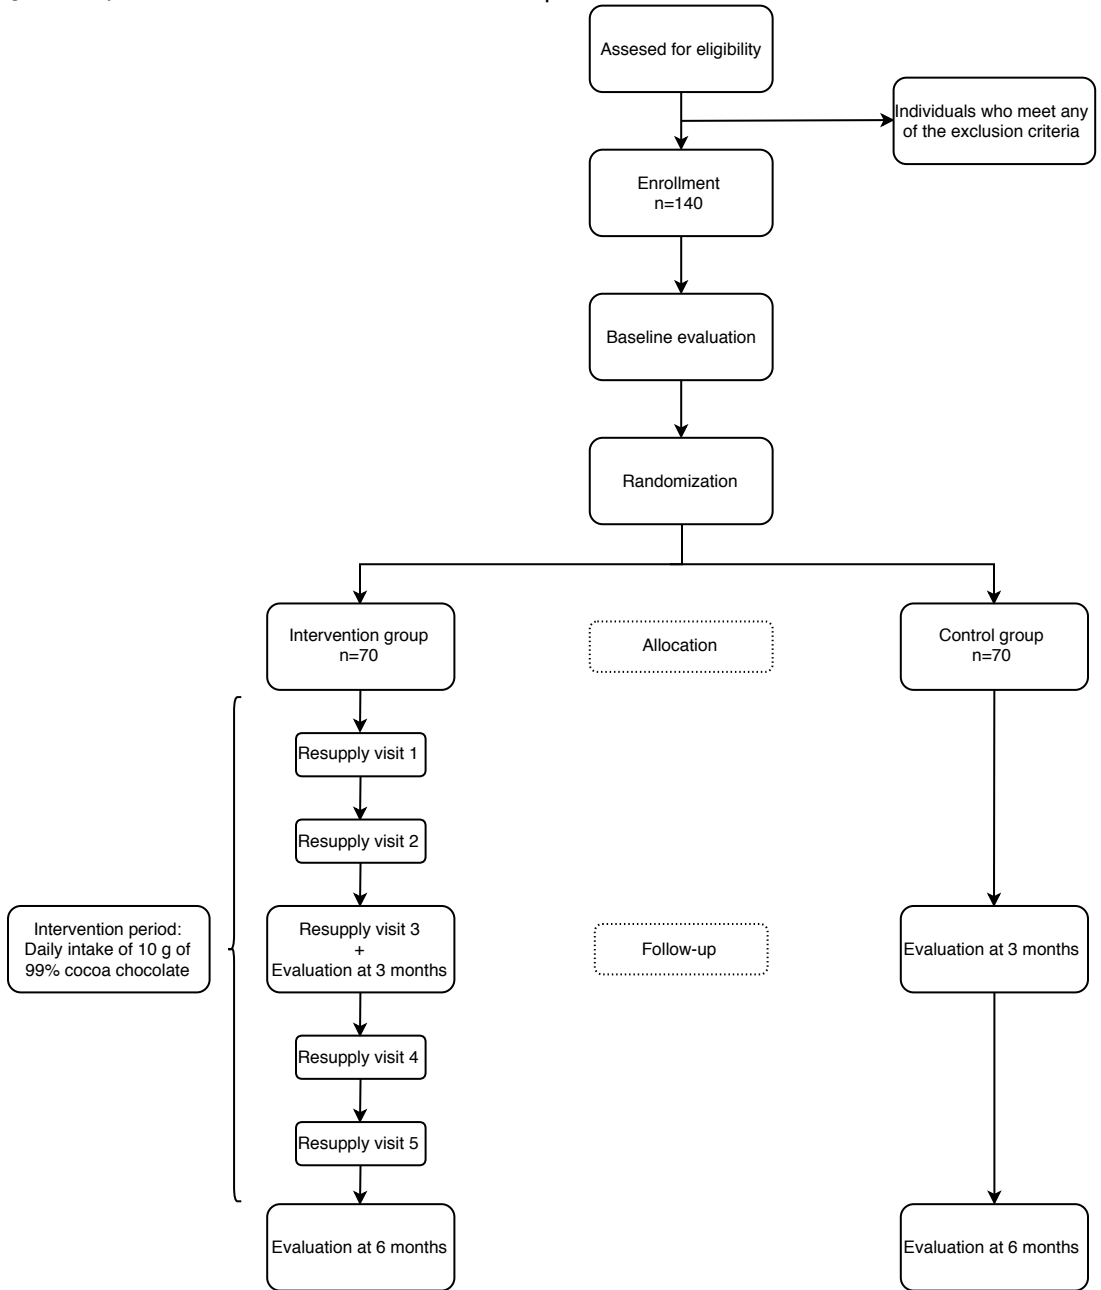

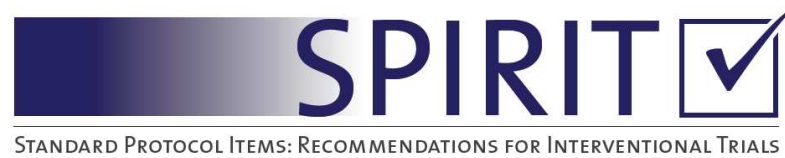

SPIRIT 2013 Checklist: Recommended items to address in a clinical trial protocol and related documents\*

| Section/item                      | Item No | Description                                                                                                                                                                                                                                                                              | Addressed on page number |
|-----------------------------------|---------|------------------------------------------------------------------------------------------------------------------------------------------------------------------------------------------------------------------------------------------------------------------------------------------|--------------------------|
| <b>Administrative information</b> |         |                                                                                                                                                                                                                                                                                          |                          |
| Title                             | 1       | Descriptive title identifying the study design, population, interventions, and, if applicable, trial acronym                                                                                                                                                                             | 1                        |
| Trial registration                | 2a      | Trial identifier and registry name. If not yet registered, name of intended registry                                                                                                                                                                                                     | 3                        |
|                                   | 2b      | All items from the World Health Organization Trial Registration Data Set                                                                                                                                                                                                                 | 3                        |
| Protocol version                  | 3       | Date and version identifier                                                                                                                                                                                                                                                              | NA                       |
| Funding                           | 4       | Sources and types of financial, material, and other support                                                                                                                                                                                                                              | 21-22                    |
| Roles and responsibilities        | 5a      | Names, affiliations, and roles of protocol contributors                                                                                                                                                                                                                                  | 21                       |
|                                   | 5b      | Name and contact information for the trial sponsor                                                                                                                                                                                                                                       | 21-22                    |
|                                   | 5c      | Role of study sponsor and funders, if any, in study design; collection, management, analysis, and interpretation of data; writing of the report; and the decision to submit the report for publication, including whether they will have ultimate authority over any of these activities | 22                       |
|                                   | 5d      | Composition, roles, and responsibilities of the coordinating centre, steering committee, endpoint adjudication committee, data management team, and other individuals or groups overseeing the trial, if applicable (see Item 21a for data monitoring committee)                         | 21                       |

1  
2  
3  
4  
5  
6  
7  
8  
9  
10  
11  
12  
13  
14  
15  
16  
17  
18  
19  
20  
21  
22  
23  
24  
25  
26  
27  
28  
29  
30  
31  
32  
33  
34  
35  
36  
37  
38  
39  
40  
41  
42  
43  
44  
45  
46  
47**Introduction**

|                          |    |                                                                                                                                                                                                           |     |
|--------------------------|----|-----------------------------------------------------------------------------------------------------------------------------------------------------------------------------------------------------------|-----|
| Background and rationale | 6a | Description of research question and justification for undertaking the trial, including summary of relevant studies (published and unpublished) examining benefits and harms for each intervention        | 5-7 |
|                          | 6b | Explanation for choice of comparators                                                                                                                                                                     | 5-7 |
| Objectives               | 7  | Specific objectives or hypotheses                                                                                                                                                                         | 7   |
| Trial design             | 8  | Description of trial design including type of trial (eg, parallel group, crossover, factorial, single group), allocation ratio, and framework (eg, superiority, equivalence, noninferiority, exploratory) | 8   |

**Methods: Participants, interventions, and outcomes**

|                      |     |                                                                                                                                                                                                                                                                                                                                                                                |          |
|----------------------|-----|--------------------------------------------------------------------------------------------------------------------------------------------------------------------------------------------------------------------------------------------------------------------------------------------------------------------------------------------------------------------------------|----------|
| Study setting        | 9   | Description of study settings (eg, community clinic, academic hospital) and list of countries where data will be collected. Reference to where list of study sites can be obtained                                                                                                                                                                                             | 8        |
| Eligibility criteria | 10  | Inclusion and exclusion criteria for participants. If applicable, eligibility criteria for study centres and individuals who will perform the interventions (eg, surgeons, psychotherapists)                                                                                                                                                                                   | 8        |
| Interventions        | 11a | Interventions for each group with sufficient detail to allow replication, including how and when they will be administered                                                                                                                                                                                                                                                     | 9        |
|                      | 11b | Criteria for discontinuing or modifying allocated interventions for a given trial participant (eg, drug dose change in response to harms, participant request, or improving/worsening disease)                                                                                                                                                                                 | NA       |
|                      | 11c | Strategies to improve adherence to intervention protocols, and any procedures for monitoring adherence (eg, drug tablet return, laboratory tests)                                                                                                                                                                                                                              | 10       |
|                      | 11d | Relevant concomitant care and interventions that are permitted or prohibited during the trial                                                                                                                                                                                                                                                                                  | 12       |
| Outcomes             | 12  | Primary, secondary, and other outcomes, including the specific measurement variable (eg, systolic blood pressure), analysis metric (eg, change from baseline, final value, time to event), method of aggregation (eg, median, proportion), and time point for each outcome. Explanation of the clinical relevance of chosen efficacy and harm outcomes is strongly recommended | 10-12    |
| Participant timeline | 13  | Time schedule of enrolment, interventions (including any run-ins and washouts), assessments, and visits for participants. A schematic diagram is highly recommended (see Figure)                                                                                                                                                                                               | Figure 1 |

|   |             |    |                                                                                                                                                                                       |   |
|---|-------------|----|---------------------------------------------------------------------------------------------------------------------------------------------------------------------------------------|---|
| 1 |             |    |                                                                                                                                                                                       |   |
| 2 |             |    |                                                                                                                                                                                       |   |
| 3 | Sample size | 14 | Estimated number of participants needed to achieve study objectives and how it was determined, including clinical and statistical assumptions supporting any sample size calculations | 8 |
| 4 |             |    |                                                                                                                                                                                       |   |
| 5 | Recruitment | 15 | Strategies for achieving adequate participant enrolment to reach target sample size                                                                                                   | 8 |
| 6 |             |    |                                                                                                                                                                                       |   |
| 7 |             |    |                                                                                                                                                                                       |   |

## 8 **Methods: Assignment of interventions (for controlled trials)**

### 9 Allocation:

|    |                                  |     |                                                                                                                                                                                                                                                                                                                                                          |    |
|----|----------------------------------|-----|----------------------------------------------------------------------------------------------------------------------------------------------------------------------------------------------------------------------------------------------------------------------------------------------------------------------------------------------------------|----|
| 10 |                                  |     |                                                                                                                                                                                                                                                                                                                                                          |    |
| 11 |                                  |     |                                                                                                                                                                                                                                                                                                                                                          |    |
| 12 | Sequence generation              | 16a | Method of generating the allocation sequence (eg, computer-generated random numbers), and list of any factors for stratification. To reduce predictability of a random sequence, details of any planned restriction (eg, blocking) should be provided in a separate document that is unavailable to those who enrol participants or assign interventions | 9  |
| 13 |                                  |     |                                                                                                                                                                                                                                                                                                                                                          |    |
| 14 |                                  |     |                                                                                                                                                                                                                                                                                                                                                          |    |
| 15 |                                  |     |                                                                                                                                                                                                                                                                                                                                                          |    |
| 16 |                                  |     |                                                                                                                                                                                                                                                                                                                                                          |    |
| 17 | Allocation concealment mechanism | 16b | Mechanism of implementing the allocation sequence (eg, central telephone; sequentially numbered, opaque, sealed envelopes), describing any steps to conceal the sequence until interventions are assigned                                                                                                                                                | 9  |
| 18 |                                  |     |                                                                                                                                                                                                                                                                                                                                                          |    |
| 19 |                                  |     |                                                                                                                                                                                                                                                                                                                                                          |    |
| 20 |                                  |     |                                                                                                                                                                                                                                                                                                                                                          |    |
| 21 | Implementation                   | 16c | Who will generate the allocation sequence, who will enrol participants, and who will assign participants to interventions                                                                                                                                                                                                                                | 9  |
| 22 |                                  |     |                                                                                                                                                                                                                                                                                                                                                          |    |
| 23 |                                  |     |                                                                                                                                                                                                                                                                                                                                                          |    |
| 24 | Blinding (masking)               | 17a | Who will be blinded after assignment to interventions (eg, trial participants, care providers, outcome assessors, data analysts), and how                                                                                                                                                                                                                | 13 |
| 25 |                                  |     |                                                                                                                                                                                                                                                                                                                                                          |    |
| 26 |                                  |     |                                                                                                                                                                                                                                                                                                                                                          |    |
| 27 |                                  | 17b | If blinded, circumstances under which unblinding is permissible, and procedure for revealing a participant's allocated intervention during the trial                                                                                                                                                                                                     | 13 |
| 28 |                                  |     |                                                                                                                                                                                                                                                                                                                                                          |    |
| 29 |                                  |     |                                                                                                                                                                                                                                                                                                                                                          |    |
| 30 |                                  |     |                                                                                                                                                                                                                                                                                                                                                          |    |

## 31 **Methods: Data collection, management, and analysis**

|    |                         |     |                                                                                                                                                                                                                                                                                                                                                                                                              |       |
|----|-------------------------|-----|--------------------------------------------------------------------------------------------------------------------------------------------------------------------------------------------------------------------------------------------------------------------------------------------------------------------------------------------------------------------------------------------------------------|-------|
| 32 |                         |     |                                                                                                                                                                                                                                                                                                                                                                                                              |       |
| 33 | Data collection methods | 18a | Plans for assessment and collection of outcome, baseline, and other trial data, including any related processes to promote data quality (eg, duplicate measurements, training of assessors) and a description of study instruments (eg, questionnaires, laboratory tests) along with their reliability and validity, if known. Reference to where data collection forms can be found, if not in the protocol | 10-12 |
| 34 |                         |     |                                                                                                                                                                                                                                                                                                                                                                                                              |       |
| 35 |                         |     |                                                                                                                                                                                                                                                                                                                                                                                                              |       |
| 36 |                         |     |                                                                                                                                                                                                                                                                                                                                                                                                              |       |
| 37 |                         |     |                                                                                                                                                                                                                                                                                                                                                                                                              |       |
| 38 |                         | 18b | Plans to promote participant retention and complete follow-up, including list of any outcome data to be collected for participants who discontinue or deviate from intervention protocols                                                                                                                                                                                                                    | NA    |
| 39 |                         |     |                                                                                                                                                                                                                                                                                                                                                                                                              |       |
| 40 |                         |     |                                                                                                                                                                                                                                                                                                                                                                                                              |       |
| 41 |                         |     |                                                                                                                                                                                                                                                                                                                                                                                                              |       |
| 42 |                         |     |                                                                                                                                                                                                                                                                                                                                                                                                              |       |
| 43 |                         |     |                                                                                                                                                                                                                                                                                                                                                                                                              |       |
| 44 |                         |     |                                                                                                                                                                                                                                                                                                                                                                                                              |       |
| 45 |                         |     |                                                                                                                                                                                                                                                                                                                                                                                                              |       |
| 46 |                         |     |                                                                                                                                                                                                                                                                                                                                                                                                              |       |
| 47 |                         |     |                                                                                                                                                                                                                                                                                                                                                                                                              |       |

1  
2  
3  
4  
5  
6  
7  
8  
9  
10  
11  
12  
13  
14  
15  
16  
17  
18  
19  
20  
21  
22  
23  
24  
25  
26  
27  
28  
29  
30  
31  
32  
33  
34  
35  
36  
37  
38  
39  
40  
41  
42  
43  
44  
45  
46  
47

|                     |     |                                                                                                                                                                                                                                                                   |       |
|---------------------|-----|-------------------------------------------------------------------------------------------------------------------------------------------------------------------------------------------------------------------------------------------------------------------|-------|
| Data management     | 19  | Plans for data entry, coding, security, and storage, including any related processes to promote data quality (eg, double data entry; range checks for data values). Reference to where details of data management procedures can be found, if not in the protocol | NA    |
| Statistical methods | 20a | Statistical methods for analysing primary and secondary outcomes. Reference to where other details of the statistical analysis plan can be found, if not in the protocol                                                                                          | 14    |
|                     | 20b | Methods for any additional analyses (eg, subgroup and adjusted analyses)                                                                                                                                                                                          | 14-15 |
|                     | 20c | Definition of analysis population relating to protocol non-adherence (eg, as randomised analysis), and any statistical methods to handle missing data (eg, multiple imputation)                                                                                   | 14-15 |

**Methods: Monitoring**

|                 |     |                                                                                                                                                                                                                                                                                                                                       |    |
|-----------------|-----|---------------------------------------------------------------------------------------------------------------------------------------------------------------------------------------------------------------------------------------------------------------------------------------------------------------------------------------|----|
| Data monitoring | 21a | Composition of data monitoring committee (DMC); summary of its role and reporting structure; statement of whether it is independent from the sponsor and competing interests; and reference to where further details about its charter can be found, if not in the protocol. Alternatively, an explanation of why a DMC is not needed | NA |
|                 | 21b | Description of any interim analyses and stopping guidelines, including who will have access to these interim results and make the final decision to terminate the trial                                                                                                                                                               | NA |
| Harms           | 22  | Plans for collecting, assessing, reporting, and managing solicited and spontaneously reported adverse events and other unintended effects of trial interventions or trial conduct                                                                                                                                                     | NA |
| Auditing        | 23  | Frequency and procedures for auditing trial conduct, if any, and whether the process will be independent from investigators and the sponsor                                                                                                                                                                                           | NA |

**Ethics and dissemination**

|                          |    |                                                                                                                                                                                                                                  |    |
|--------------------------|----|----------------------------------------------------------------------------------------------------------------------------------------------------------------------------------------------------------------------------------|----|
| Research ethics approval | 24 | Plans for seeking research ethics committee/institutional review board (REC/IRB) approval                                                                                                                                        | 15 |
| Protocol amendments      | 25 | Plans for communicating important protocol modifications (eg, changes to eligibility criteria, outcomes, analyses) to relevant parties (eg, investigators, REC/IRBs, trial participants, trial registries, journals, regulators) | 15 |

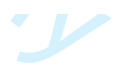

|    |                               |     |                                                                                                                                                                                                                                                                                     |    |
|----|-------------------------------|-----|-------------------------------------------------------------------------------------------------------------------------------------------------------------------------------------------------------------------------------------------------------------------------------------|----|
| 1  |                               |     |                                                                                                                                                                                                                                                                                     |    |
| 2  |                               |     |                                                                                                                                                                                                                                                                                     |    |
| 3  | Consent or assent             | 26a | Who will obtain informed consent or assent from potential trial participants or authorised surrogates, and how (see Item 32)                                                                                                                                                        | 15 |
| 4  |                               |     |                                                                                                                                                                                                                                                                                     |    |
| 5  |                               |     |                                                                                                                                                                                                                                                                                     |    |
| 6  |                               | 26b | Additional consent provisions for collection and use of participant data and biological specimens in ancillary studies, if applicable                                                                                                                                               | NA |
| 7  |                               |     |                                                                                                                                                                                                                                                                                     |    |
| 8  | Confidentiality               | 27  | How personal information about potential and enrolled participants will be collected, shared, and maintained in order to protect confidentiality before, during, and after the trial                                                                                                | 15 |
| 9  |                               |     |                                                                                                                                                                                                                                                                                     |    |
| 10 |                               |     |                                                                                                                                                                                                                                                                                     |    |
| 11 | Declaration of interests      | 28  | Financial and other competing interests for principal investigators for the overall trial and each study site                                                                                                                                                                       | 22 |
| 12 |                               |     |                                                                                                                                                                                                                                                                                     |    |
| 13 |                               |     |                                                                                                                                                                                                                                                                                     |    |
| 14 | Access to data                | 29  | Statement of who will have access to the final trial dataset, and disclosure of contractual agreements that limit such access for investigators                                                                                                                                     | NA |
| 15 |                               |     |                                                                                                                                                                                                                                                                                     |    |
| 16 |                               |     |                                                                                                                                                                                                                                                                                     |    |
| 17 | Ancillary and post-trial care | 30  | Provisions, if any, for ancillary and post-trial care, and for compensation to those who suffer harm from trial participation                                                                                                                                                       | NA |
| 18 |                               |     |                                                                                                                                                                                                                                                                                     |    |
| 19 |                               |     |                                                                                                                                                                                                                                                                                     |    |
| 20 | Dissemination policy          | 31a | Plans for investigators and sponsor to communicate trial results to participants, healthcare professionals, the public, and other relevant groups (eg, via publication, reporting in results databases, or other data sharing arrangements), including any publication restrictions | 16 |
| 21 |                               |     |                                                                                                                                                                                                                                                                                     |    |
| 22 |                               |     |                                                                                                                                                                                                                                                                                     |    |
| 23 |                               |     |                                                                                                                                                                                                                                                                                     |    |
| 24 |                               |     |                                                                                                                                                                                                                                                                                     |    |
| 25 |                               | 31b | Authorship eligibility guidelines and any intended use of professional writers                                                                                                                                                                                                      | 16 |
| 26 |                               |     |                                                                                                                                                                                                                                                                                     |    |
| 27 |                               | 31c | Plans, if any, for granting public access to the full protocol, participant-level dataset, and statistical code                                                                                                                                                                     | 16 |
| 28 |                               |     |                                                                                                                                                                                                                                                                                     |    |
| 29 | <b>Appendices</b>             |     |                                                                                                                                                                                                                                                                                     |    |
| 30 |                               |     |                                                                                                                                                                                                                                                                                     |    |
| 31 | Informed consent materials    | 32  | Model consent form and other related documentation given to participants and authorised surrogates                                                                                                                                                                                  | NA |
| 32 |                               |     |                                                                                                                                                                                                                                                                                     |    |
| 33 |                               |     |                                                                                                                                                                                                                                                                                     |    |
| 34 | Biological specimens          | 33  | Plans for collection, laboratory evaluation, and storage of biological specimens for genetic or molecular analysis in the current trial and for future use in ancillary studies, if applicable                                                                                      | NA |
| 35 |                               |     |                                                                                                                                                                                                                                                                                     |    |
| 36 |                               |     |                                                                                                                                                                                                                                                                                     |    |

37 \*It is strongly recommended that this checklist be read in conjunction with the SPIRIT 2013 Explanation & Elaboration for important clarification on the items.  
 38 Amendments to the protocol should be tracked and dated. The SPIRIT checklist is copyrighted by the SPIRIT Group under the Creative Commons  
 39 "[Attribution-NonCommercial-NoDerivs 3.0 Unported](https://creativecommons.org/licenses/by-nc-nd/3.0/)" license.  
 40



# BMJ Open

## Vascular and cognitive effects of chocolate with a high concentration of cocoa in postmenopausal women: a study protocol for a randomized clinical trial

|                               |                                                                                                                                                                                                                                                                                                                                                                                                                                                                                                                                                                                                                                                                                                                                                                                                                                                                                                                                                                                                                                                                                                                                                                                                                                                                                                                                                                                                                                                                                                                                                                                                                                                                                                                                                                                                                                                                                                                                                                                                                                                                                                                                                                                                                                                                                        |
|-------------------------------|----------------------------------------------------------------------------------------------------------------------------------------------------------------------------------------------------------------------------------------------------------------------------------------------------------------------------------------------------------------------------------------------------------------------------------------------------------------------------------------------------------------------------------------------------------------------------------------------------------------------------------------------------------------------------------------------------------------------------------------------------------------------------------------------------------------------------------------------------------------------------------------------------------------------------------------------------------------------------------------------------------------------------------------------------------------------------------------------------------------------------------------------------------------------------------------------------------------------------------------------------------------------------------------------------------------------------------------------------------------------------------------------------------------------------------------------------------------------------------------------------------------------------------------------------------------------------------------------------------------------------------------------------------------------------------------------------------------------------------------------------------------------------------------------------------------------------------------------------------------------------------------------------------------------------------------------------------------------------------------------------------------------------------------------------------------------------------------------------------------------------------------------------------------------------------------------------------------------------------------------------------------------------------------|
| Journal:                      | <i>BMJ Open</i>                                                                                                                                                                                                                                                                                                                                                                                                                                                                                                                                                                                                                                                                                                                                                                                                                                                                                                                                                                                                                                                                                                                                                                                                                                                                                                                                                                                                                                                                                                                                                                                                                                                                                                                                                                                                                                                                                                                                                                                                                                                                                                                                                                                                                                                                        |
| Manuscript ID                 | bmjopen-2018-024095.R1                                                                                                                                                                                                                                                                                                                                                                                                                                                                                                                                                                                                                                                                                                                                                                                                                                                                                                                                                                                                                                                                                                                                                                                                                                                                                                                                                                                                                                                                                                                                                                                                                                                                                                                                                                                                                                                                                                                                                                                                                                                                                                                                                                                                                                                                 |
| Article Type:                 | Protocol                                                                                                                                                                                                                                                                                                                                                                                                                                                                                                                                                                                                                                                                                                                                                                                                                                                                                                                                                                                                                                                                                                                                                                                                                                                                                                                                                                                                                                                                                                                                                                                                                                                                                                                                                                                                                                                                                                                                                                                                                                                                                                                                                                                                                                                                               |
| Date Submitted by the Author: | 25-Jul-2018                                                                                                                                                                                                                                                                                                                                                                                                                                                                                                                                                                                                                                                                                                                                                                                                                                                                                                                                                                                                                                                                                                                                                                                                                                                                                                                                                                                                                                                                                                                                                                                                                                                                                                                                                                                                                                                                                                                                                                                                                                                                                                                                                                                                                                                                            |
| Complete List of Authors:     | <p>Garcia-Yu, Irene; Institute of Biomedical Research of Salamanca (IBSAL), Primary Health Care Research Unit, La Alamedilla Health Center. Health Service of Castilla y León (SACyL); Consejería de Sanidad, Junta de Castilla y León, Public Health Information</p> <p>Garcia-Ortiz, Luis; Institute of Biomedical Research of Salamanca (IBSAL), Primary Health Care Research Unit, La Alamedilla Health Center. Health Service of Castilla y León (SACyL); University of Salamanca, Department of Biomedical and Diagnostic Sciences</p> <p>Gomez-Marcos, Manuel; Institute of Biomedical Research of Salamanca (IBSAL), Primary Health Care Research Unit, La Alamedilla Health Center. Health Service of Castilla y León (SACyL); University of Salamanca, Medicine</p> <p>Alonso-Dominguez, Rosario; Institute of Biomedical Research of Salamanca (IBSAL), Primary Health Care Research Unit, La Alamedilla Health Center. Health Service of Castilla y León (SACyL)</p> <p>González-Sánchez, J; Institute of Biomedical Research of Salamanca (IBSAL), Primary Health Care Research Unit, La Alamedilla Health Center. Health Service of Castilla y León (SACyL); University of Extremadura, Nursing</p> <p>Mora-Simon, Sara; Institute of Biomedical Research of Salamanca (IBSAL), Primary Health Care Research Unit, La Alamedilla Health Center. Health Service of Castilla y León (SACyL); University of Salamanca, Basic Psychology, Psychobiology and Behavioral Sciences Methodology</p> <p>González-Manzano, Susana; University of Salamanca, Analytical Chemistry</p> <p>Rodriguez-Sanchez, Emiliano; Institute of Biomedical Research of Salamanca (IBSAL), Primary Health Care Research Unit, La Alamedilla Health Center. Health Service of Castilla y León (SACyL); University of Salamanca, Medicine</p> <p>Maderuelo-Fernandez, Jose; Institute of Biomedical Research of Salamanca (IBSAL), Primary Health Care Research Unit, La Alamedilla Health Center. Health Service of Castilla y León (SACyL)</p> <p>Recio-Rodriguez, Jose; Institute of Biomedical Research of Salamanca (IBSAL), Primary Health Care Research Unit, La Alamedilla Health Center. Health Service of Castilla y León (SACyL); University of Salamanca, Nursing and Physiotherapy</p> |
| <b>Primary Subject            | Nutrition and metabolism                                                                                                                                                                                                                                                                                                                                                                                                                                                                                                                                                                                                                                                                                                                                                                                                                                                                                                                                                                                                                                                                                                                                                                                                                                                                                                                                                                                                                                                                                                                                                                                                                                                                                                                                                                                                                                                                                                                                                                                                                                                                                                                                                                                                                                                               |

1  
2  
3  
4  
5  
6  
7  
8  
9  
10  
11  
12  
13  
14  
15  
16  
17  
18  
19  
20  
21  
22  
23  
24  
25  
26  
27  
28  
29  
30  
31  
32  
33  
34  
35  
36  
37  
38  
39  
40  
41  
42  
43  
44  
45  
46  
47  
48  
49  
50  
51  
52  
53  
54  
55  
56  
57  
58  
59  
60

|                            |                                                                                                    |
|----------------------------|----------------------------------------------------------------------------------------------------|
| Heading</b>:               |                                                                                                    |
| Secondary Subject Heading: | Cardiovascular medicine                                                                            |
| Keywords:                  | chocolate, postmenopause, arterial pressure, vascular stiffness, body composition, quality of life |
|                            |                                                                                                    |

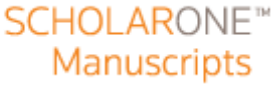

## Note from the Editors: Instructions for reviewers of study protocols

---

Since launching in 2011, BMJ Open has published study protocols for planned or ongoing research studies. If data collection is complete, we will not consider the manuscript.

Publishing study protocols enables researchers and funding bodies to stay up to date in their fields by providing exposure to research activity that may not otherwise be widely publicised. This can help prevent unnecessary duplication of work and will hopefully enable collaboration. Publishing protocols in full also makes available more information than is currently required by trial registries and increases transparency, making it easier for others (editors, reviewers and readers) to see and understand any deviations from the protocol that occur during the conduct of the study.

The scientific integrity and the credibility of the study data depend substantially on the study design and methodology, which is why the study protocol requires a thorough peer-review.

*BMJ Open* will consider for publication protocols for any study design, including observational studies and systematic reviews.

Some things to keep in mind when reviewing the study protocol:

- Protocol papers should report planned or ongoing studies. The dates of the study should be included in the manuscript.
- Unfortunately we are unable to customize the reviewer report form for study protocols. As such, some of the items (i.e., those pertaining to results) on the form should be scored as Not Applicable (N/A).
- While some baseline data can be presented, there should be no results or conclusions present in the study protocol.
- For studies that are ongoing, it is generally the case that very few changes can be made to the methodology. As such, requests for revisions are generally clarifications for the rationale or details relating to the methods. If there is a major flaw in the study that would prevent a sound interpretation of the data, we would expect the study protocol to be rejected.

**TITLE: Vascular and cognitive effects of chocolate with a high concentration of cocoa in postmenopausal women: a study protocol for a randomized clinical trial.**

**AUTHORS:**

Irene A Garcia-Yu<sup>1,2</sup>, Luis Garcia-Ortiz<sup>1,3</sup>, Manuel A Gómez-Marcos<sup>1,4</sup>, Rosario Alonso-Dominguez<sup>1</sup>, Jesus Gonzalez-Sanchez<sup>1,5</sup>, Sara Mora-Simon<sup>1,6</sup>, Susana González-Manzano<sup>7</sup>, Emiliano Rodriguez-Sanchez<sup>1,4</sup>, Jose A Maderuelo-Fernandez<sup>1\*</sup>, Jose I Recio-Rodriguez<sup>1,8\*</sup>

1. Institute of Biomedical Research of Salamanca (IBSAL), Primary Health Care Research Unit, La Alamedilla Health Center. Health Service of Castilla y León (SACyL), Salamanca, Spain.

2. Public Health Information Service, Consejería de Sanidad, Junta de Castilla y León, Valladolid, Spain.

3. Department of Biomedical and Diagnostic Sciences, University of Salamanca, Salamanca, Spain.

4. Department of Medicine, University of Salamanca, Salamanca, Spain.

5. Department of Nursing, University of Extremadura, Plasencia, Spain.

6. Department of Basic Psychology, Psychobiology and Behavioral Sciences Methodology, University of Salamanca, Salamanca, Spain.

7. Department of Analytical Chemistry, University of Salamanca, Salamanca, Spain.

8. Department of Nursing and Physiotherapy, University of Salamanca, Salamanca, Spain.

\*These authors contributed equally to this work.

**CORRESPONDING AUTHOR:**

Irene A Garcia-Yu

Primary Care Research Unit, The Alamedilla Health Centre. 37003 Salamanca, Spain.

ireneailinggarciaayu@gmail.com

0034923231859

1  
2  
3 29 **ABSTRACT**

4 30 **Introduction:** The intake of polyphenols has shown certain health benefits. The aim of  
5  
6 31 this study is to assess the effect of adding a daily amount of chocolate high in cocoa  
7  
8 32 content and polyphenols to the normal diet on blood pressure, vascular function,  
9  
10 33 cognitive performance, quality of life and body composition in postmenopausal women.

11  
12 34 **Methods and analysis:** Randomized clinical trial with two parallel groups involving a  
13  
14 35 total of 140 women between 50 and 64 years of age in the postmenopausal period,  
15  
16 36 defined by amenorrhea of at least 12 consecutive months. The main variable will be the  
17  
18 37 change in blood pressure. Secondary variables will be changes in vascular function,  
19  
20 38 quality of life, cognitive performance and body composition. The intervention group will  
21  
22 39 be given chocolate containing 99% cocoa, with instructions to add 10 g daily to their  
23  
24 40 normal diet for 6 months. The daily nutritional contribution of this amount of chocolate  
25  
26 41 is 59 Kcal and 65.4 mg of polyphenols. There will be no intervention in the control  
27  
28 42 group. All variables will be measured at the baseline visit and at 3 and 6 months after  
29  
30 43 randomization, except cognitive performance and quality of life, to be assessed only at  
31  
32 44 baseline and at 6 months. Recruitment is scheduled to begin on June 1, 2018, and the  
33  
34 45 study will continue until May 31, 2019.

35  
36 46 **Ethics and dissemination:** This study was approved by the Clinical Research Ethics  
37  
38 47 Committee of the Health Area of Salamanca, Spain ("CREC of Health Area of  
39  
40 48 Salamanca") in February 2018. A SPIRIT checklist is available for this protocol. The  
41  
42 49 clinical trial has been registered at ClinicalTrials.gov provided by the US National  
43  
44 50 Library of Medicine, number NCT03492983. The results will be disseminated through  
45  
46 51 open access peer-reviewed journals, conference presentations, broadcast media as  
47  
48 52 well as presentation to stakeholders.

49  
50 53 **Keywords:** Chocolate, postmenopause, arterial pressure, vascular stiffness, body  
51  
52 54 composition, quality of life.

53  
54  
55  
56 55  
57 56

1  
2  
3 57 **Strengths and limitations of this study:**

- 4  
5 58 - This study used a commercially available chocolate with high content of cocoa and  
6  
7 59 polyphenols during the intervention.  
8  
9 60 - Blood pressure and vascular function will be measured objectively using a  
10  
11 61 sphygmomanometer and a Vasera VS-2000 device (Fukuda Denshi), with body  
12  
13 62 composition measured by impedance analysis, while quality of life and cognitive  
14  
15 63 performance will be assessed using validated instruments.  
16  
17 64 - Due to the nature of the intervention, the participants cannot be blinded, although  
18  
19 65 the researchers who perform the measurements and the statistical analysis will be  
20  
21 66 blinded.

22 67 **INTRODUCTION**

23  
24 68 Polyphenols are bioactive compounds found in many plants, fruits and vegetables. The  
25  
26 69 beneficial effects on human health associated with the consumption of a diet rich in  
27  
28 70 polyphenols has generated great scientific interest in these substances.[1-3] The action  
29  
30 71 of polyphenols is based on their antioxidant capacity through the uptake of free  
31  
32 72 radicals, the chelation of metals with redox properties and the modulation and inhibition  
33  
34 73 of enzymatic activity.[4]

35  
36  
37 74 The most abundant polyphenols in cocoa are flavonoids, which have been linked to a  
38  
39 75 protective effect against cardiovascular disease, decreasing the risk of cardiovascular  
40  
41 76 morbidity and mortality and favouring the prevention of other chronic diseases such as  
42  
43 77 diabetes mellitus type 2.[1-3, 5-7] The ability to reduce cardiovascular risk could be due  
44  
45 78 to an improvement in the elements that define metabolic syndrome, the improvement of  
46  
47 79 vascular endothelial dysfunction, insulin resistance and the inhibition of platelet  
48  
49 80 activation and aggregation.[8, 9] However, although current evidence suggests that  
50  
51 81 polyphenols produce an improvement in cardiovascular health, it is not enough to  
52  
53 82 determine the minimum amount of intake necessary to achieve health benefits.[10]

1  
2  
3 83 **Cocoa polyphenols and blood pressure:** The effect of consuming polyphenols  
4  
5 84 present in chocolate on the blood pressure (BP) statistics of healthy individuals is not  
6  
7 85 clear. Cocoa consumption has been associated with an improvement in endothelial  
8  
9 86 function and a decrease in blood pressure in both healthy subjects and those with risk  
10  
11 87 factors and cardiovascular diseases.[11, 12] Some studies have observed a dose-  
12  
13 88 dependent relationship between cocoa intake and clinical BP, with higher consumption  
14  
15 89 equated to lower blood pressure and better vascular function.[13, 14] Conversely, other  
16  
17 90 research has not obtained significant changes in these parameters related to the  
18  
19 91 supplementation of cocoa or pure polyphenols such as epicatechin or quercetin.[15,  
20  
21 92 16]

22  
23 93 Endothelial dysfunction in postmenopausal women causes changes that favour the  
24  
25 94 development of cardiovascular risk factors and atherosclerosis, which lead to the  
26  
27 95 appearance and maintenance of hypertension.[17, 18] A decrease in BP has been  
28  
29 96 observed in this group after daily consumption of cocoa with a flavonol content of 40.12  
30  
31 97 mg. Below this level, however, no changes have been observed.[19]

32  
33  
34 98 **Cocoa polyphenols and vascular function:** Among healthy individuals as well as  
35  
36 99 postmenopausal women, the consumption of polyphenols present in cocoa has been  
37  
38 100 associated with a dose-dependent improvement of vascular function, in particular of  
39  
40 101 arterial stiffness measured by pulse wave speed.[13, 14, 19] One of these studies also  
41  
42 102 suggests that the reduction in arterial stiffness observed in postmenopausal women  
43  
44 103 after consumption of cocoa is independent of the frequency of the intake.[19] However,  
45  
46 104 this relationship is not evident in people with mild hypertension when cardio-ankle  
47  
48 105 vascular index (CAVI) is used as a measure of arterial stiffness.[20]

49  
50 106 There is also evidence of the influence of these polyphenols in reducing the  
51  
52 107 augmentation index (AIx). The study by West et al,[21] involving subjects with excess  
53  
54 108 weight and moderate obesity, concludes that the treatment with dark chocolate  
55  
56 109 decreases AIx in women, although it seems that this association may affect more the

1  
2  
3 110 elasticity of the large arteries, especially in subjects with obesity and diabetes mellitus  
4  
5 111 type 2.[22]

6  
7 112 **Cocoa polyphenols and cognitive performance:** There is evidence to suggest that  
8  
9 113 chocolate rich in polyphenols may be beneficial for cognitive performance and state  
10  
11 114 since it improves mental processing speed and attenuates the increase of mental  
12  
13 115 fatigue among healthy young adults.[23, 24] An improvement in cognitive performance  
14  
15 116 among older age groups after eating chocolate has also been observed[25] and  
16  
17 117 especially in subjects with higher risk of cardiovascular disease.[26] Several studies  
18  
19 118 also show that polyphenol-rich chocolate causes an improvement in executive function  
20  
21 119 and categorical fluency,[27] in working memory,[28, 29] and a slowing of mental  
22  
23 120 fatigue[30] and also that a higher frequency of chocolate consumption has been  
24  
25 121 associated with better cognitive function.[29] Furthermore, a positive influence of cocoa  
26  
27 122 polyphenols on physiological processes has been reported, with a neuroprotective  
28  
29 123 effect[31] and improved cognitive performance.[32] In this regard, it has been  
30  
31 124 suggested that the brain-derived neurotrophic factor (BDNF) may play a role in the  
32  
33 125 cognitive enhancement induced by the flavonoides.[33] Favorable effects on  
34  
35 126 cerebrovascular function have also been observed in postmenopausal women after  
36  
37 127 consumption of chocolate with high concentration of cocoa.[34]

38  
39 128 **Cocoa polyphenols and quality of life:** The quality of life linked to health is  
40  
41 129 represented by the individual's perception of well-being in various aspects of life,  
42  
43 130 including physical and mental aspects. The effect of chocolate and polyphenols on the  
44  
45 131 quality of life has scarcely been studied, with not a great deal of evidence available and  
46  
47 132 even less of a conclusive nature. In a study conducted among healthy people, where  
48  
49 133 regular consumption of chocolate was recorded over a year, no evidence was found of  
50  
51 134 a clear association between chocolate intake and the physical or mental components of  
52  
53 135 quality of life.[35] Nevertheless, it has been observed that the consumption of dark  
54  
55 136 chocolate may be beneficial for the quality of life of women with fibromyalgia.[36]



1  
2  
3 137 **Cocoa polyphenols and body composition:** The menopause period leads to various  
4  
5 138 changes in the body composition of women.[37] Regarding the connection between  
6  
7 139 cocoa polyphenols and body composition, results diverge. Some clinical trials involving  
8  
9 140 healthy people and overweight or obese patients have not reported significant  
10  
11 141 differences that link chocolate consumption to anthropometric measures.[16, 20, 21,  
12  
13 142 38] Other studies indicate that chocolate consumption may have positive effects on  
14  
15 143 body composition in adolescents,[39] patients with diabetes[40] or women with  
16  
17 144 obesity.[41] Two recent systematic reviews also indicate that eating chocolate is  
18  
19 145 associated with reduced body mass index (BMI) and waist circumference,[42, 43] and  
20  
21 146 one of them also concludes that the amount and the length of time during which it is  
22  
23 147 eaten play a key role in these beneficial effects.[43] Conversely, other studies such as  
24  
25 148 that carried out with the cohort of the Atherosclerosis Risk in Communities (ARIC)  
26  
27 149 study have observed a dose-dependent increase in weight after habitual chocolate  
28  
29 150 consumption.[44]

30  
31 151 In sum, the polyphenols present in chocolate seem to have a positive effect on BP,  
32  
33 152 vascular function, cognitive performance and quality of life, especially in populations  
34  
35 153 with increased cardiovascular risk such as postmenopausal women.[45] However, the  
36  
37 154 conflicting results obtained in different studies suggest that the real contribution of  
38  
39 155 these compounds to health and the underlying mechanisms remain unclear. Moreover,  
40  
41 156 most of these studies have used preparations with high concentrations of polyphenols  
42  
43 157 that are usually not present in the normal diet.

44  
45 158 This study aims to evaluate the effect of adding a daily amount of 10 g of chocolate  
46  
47 159 high in cocoa content (99%) and polyphenols to the normal diet on blood pressure,  
48  
49 160 vascular function, cognitive performance, quality of life and body composition in  
50  
51 161 postmenopausal women.

## 52 53 54 162 **METHODS AND ANALYSIS**

### 55 56 163 **Design and setting:**

1  
2  
3 164 This controlled and randomized clinical trial involves two parallel groups. The study will  
4  
5 165 be carried out in the Research Unit of the La Alamedilla Health Centre in Salamanca  
6  
7 166 (Spain), which is part of the Biomedical Research Institute of Salamanca (IBSAL) and  
8  
9 167 the Primary Care Prevention and Health Promotion Research Network (REDIAPP).  
10  
11 168 The recruitment schedule is set to start on June 1, 2018, and the study will run until  
12  
13 169 May 31, 2019. There will be a baseline assessment and two follow-ups, at 3 and 6  
14  
15 170 months.

### 171 **Study population:**

172 Those subjects who meet the selection criteria and sign the informed consent after  
173 receiving information about the objectives and implementation of the study will take  
174 part.

175 Inclusion criteria: women between 50 and 64 years of age in postmenopause, defined  
176 by and checked against amenorrhea during at least 12 consecutive months.

177 Exclusion criteria: personal history of cardiovascular disease; personal history of  
178 diabetes mellitus, arterial hypertension or dyslipidemia under pharmacological  
179 treatment; hypocaloric diets; clinically demonstrable neurological and/or  
180 neuropsychological disease; treatment with hormone replacement therapy; intolerance  
181 and/or allergy to cocoa or any of the components of the supplement.

182 Participants will be selected using a consecutive sample of women who meet the  
183 selection criteria in the GP surgeries of four urban primary care centres in Salamanca,  
184 from June 1, 2018.

### 185 **Patient and public involvement**

186 Patients and the public were not involved in the design of this study or outcome  
187 measures. We hope that the results of the study will be disseminated through press  
188 releases and information meetings with the study participants.

### 189 **Sample size:**

190 The size of the sample has been estimated based on the potential modification of the  
191 main variable, systolic blood pressure (SBP). Given alpha and beta risks of 0.05 and

1  
2  
3 192 0.20 respectively in bilateral contrast and a standard deviation (SD) of 5.8 mmHg, 140  
4  
5 193 participants (70 per group) will be necessary to detect a minimum difference of 2.9  
6  
7 194 mmHg in the SBP between the two groups. A predicted drop-out rate of 10% during  
8  
9 195 follow-up has been taken into account. This estimate has considered the results  
10  
11 196 obtained in a similar study in which a decrease in SBP of 6.5 was observed  $\pm$  5.8  
12  
13 197 mmHg.[14]

14  
15 198 **Randomization:**

16  
17 199 Participants will be assigned to the intervention group (IG) or control group (CG) at  
18  
19 200 random. The allocation sequence will be generated by an independent researcher  
20  
21 201 using the Epidat 4.2 program[46] and will remain hidden until the participants are  
22  
23 202 assigned to each group.

24  
25 203 **Intervention:**

26  
27 204 No type of intervention will be carried out with the CG participants.

28  
29 205 IG participants will be given chocolate with 99% cocoa content and asked to eat 10 g  
30  
31 206 daily for a period of 6 months. According to the EFSA (European Food Safety  
32  
33 207 Authority), 10 g of high-flavanol dark chocolate consumed in the context of a balanced  
34  
35 208 diet could help maintain endothelium-dependent vasodilation.[47] Participants will also  
36  
37 209 be given instructions on eating and keeping the product, with the recommendations, for  
38  
39 210 example, that the chocolate can be consumed in small pieces leaving them unmated in  
40  
41 211 the mouth, without chewing them. In addition, a series of recommendations will be  
42  
43 212 given remembering the organoleptic characteristics of the product, as well as the  
44  
45 213 recommendations of trying to consume the product at the same time or refrain from  
46  
47 214 ingesting it dissolved in milk. In addition, they will be given a calendar on which to  
48  
49 215 record the time it was eaten each day. This calendar will be returned to the researchers  
50  
51 216 at each replenishment visit.

52  
53 217 This amount of chocolate provides the following daily nutritional contribution: 59 Kcal,  
54  
55 218 0.8 g of carbohydrates, 1.5 g of protein, 5.1 g of fat, of which 3.1 g are saturated fats.

56  
57 219 The proportion of polyphenols per 10 g is 65.4 mg. The polyphenolic profile of this

1  
2  
3 220 compound can be seen in table 1. On each visit, IG participants will receive the amount  
4  
5 221 of chocolate they need until the next replenishment visit. In addition to the baseline  
6  
7 222 visit, there will be 5 replenishment visits in months 1, 2, 3 (coinciding with the  
8  
9 223 evaluation visit), 4 and 5. The sole purpose of the replenishment visits will be to supply  
10  
11 224 the amount of chocolate needed until the next visit, without any other intervention being  
12  
13 225 carried out.

14  
15 226 Participants in both groups will be instructed to continue with the dietary pattern they  
16  
17 227 usually follow, without changing their eating habits during the study period.

18  
19 228 **Procedures:**

20  
21 229 For each participant a baseline visit and two follow-up visits at 3 and 6 months after the  
22  
23 230 initial one are scheduled (Figure 1). The IG will also make 5 replenishment visits, in  
24  
25 231 months 1, 2, 3 (coinciding with the first follow-up visit), 4 and 5. In the replenishment  
26  
27 232 visits they will be given the amount of chocolate needed until the next visit and will  
28  
29 233 hand in the calendar with the record of the chocolate eaten.

30  
31 234 **Primary and secondary endpoints:**

32  
33 235 The primary variable will be the decrease in clinical BP, measured with a digital  
34  
35 236 sphygmomanometer. Secondary variables will include vascular function, quality of life,  
36  
37 237 cognitive performance and body composition.

38  
39 238 All variables will be measured at 3 and 6 months after randomization, except for  
40  
41 239 cognitive performance and quality of life, to be assessed only after 6 months.

42  
43 240 **Blood pressure:**

44  
45 241 Clinical systolic and diastolic blood pressure will be measured with a validated Omron  
46  
47 242 M10-IT sphygmomanometer (Omron Healthcare, Kyoto, Japan). Three measurements  
48  
49 243 will be taken in the dominant arm of the subject in a sitting position after at least 5  
50  
51 244 minutes of rest with an appropriately sized cuff, following the recommendations of the  
52  
53 245 European Society of Hypertension.[48] The average of the last two measurements will  
54  
55 246 be recorded.

56  
57 247 **Vascular function:**

1  
2  
3 248 The Vasera VS-2000 device (Fukuda Denshi) will be used to measure the CAVI and  
4  
5 249 the brachial-ankle pulse wave velocity (ba-PWV) at rest. CAVI is a good indicator of  
6  
7 250 arterial stiffness, providing an accurate estimate of the degree of atherosclerosis  
8  
9 251 without depending on blood pressure.[49] CAVI  $\geq 9$  and ba-PWV  $\geq 18.3$  will be  
10  
11 252 considered pathological.[50] Pathological CAVI is representative of subclinical  
12  
13 253 atherosclerosis.[51]

14  
15 254 **Cognitive performance:**

16  
17 255 The instructions are presented visually at the start of the baseline measurement to  
18  
19 256 ensure limiting a learning effect over the subsequent testing periods. Attention and  
20  
21 257 executive functions: Trail Making Test A will be used to measure attention and Trail  
22  
23 258 Making Test B for processing speed and executive functions.[52]

24  
25 259 Immediate verbal memory will be assessed with the Rey Auditory Verbal Learning  
26  
27 260 Test. The immediate recall of a list of 15 words is measured in three attempts, followed  
28  
29 261 by delayed verbal memory through the free recall of the words learned in the first part  
30  
31 262 of the test after 10 minutes.[53]

32  
33 263 Working memory will be assessed with the WAIS Digit Span Backward test.[54]

34  
35 264 Phonological fluency will be explored by naming as many words as possible starting  
36  
37 265 with different letters of the FAS Questionnaire in the space of one minute.[55]

38  
39 266 Categorical fluency measures verbal semantic fluency and will be assessed by naming  
40  
41 267 as many animals as possible in one minute.[56]

42  
43 268 **Quality of life:**

44  
45 269 The quality of life linked to health will be assessed through the EuroQol 5-D  
46  
47 270 questionnaire (EQ-5D). We will use the adapted Spanish version of this questionnaire,  
48  
49 271 which has been validated in the Spanish population.[57] This questionnaire consists of  
50  
51 272 three elements: the assessment by the individuals of their state of health in level of  
52  
53 273 severity by dimension (mobility, personal care, daily activities, pain/discomfort and  
54  
55 274 anxiety/depression), the assessment of their state of health on an analogue visual

1  
2  
3 275 scale, and finally an index of social values obtained for each state of health generated  
4  
5 276 by the instrument.

6  
7 277 The quality of life will also be studied using the Cervantes Scale.[58] This questionnaire  
8  
9 278 is specifically designed for menopause and postmenopause and has been validated for  
10  
11 279 Spanish women. Its 31 structured items cover the 4 dimensions of menopause:  
12  
13 280 menopause and health, sexuality, psychic domain and relationships.

#### 14 281 **Body composition:**

15  
16 282 Body composition will be measured with the Inbody 230 Monitor.[59] This analyzer  
17  
18 283 provides data on fat mass and body fat percentage as principal outcomes and also  
19  
20 284 skeletal muscle mass, total body water, fat-free mass, waist-hip ratio, basal  
21  
22 285 metabolism, and a segmental analysis.

23  
24  
25 286 Body weight will be measured twice with an electronic scale (Scale 7830, Soehnle  
26  
27 287 Professional GmbH & Co, Backnang, Germany) after proper calibration (accuracy  $\pm 0.1$   
28  
29 288 kg). Height will be measured by recording the average of two readings rounded to the  
30  
31 289 nearest centimetre using a stadiometer (Seca 222, Medical scale and measurement  
32  
33 290 system, Birmingham, UK). Both measurements will be made with the subject barefoot  
34  
35 291 and wearing light clothing. Body mass index will be calculated by dividing weight (kg)  
36  
37 292 by height squared ( $m^2$ ). Waist circumference will be assessed in accordance with the  
38  
39 293 recommendations of the Spanish Society for the Study of Obesity (SEEDO)[60] and will  
40  
41 294 be measured in duplicate before and after inhalation, using a flexible tape parallel to  
42  
43 295 the floor, at the level of the mid-point between the lowest rib and the iliac crest, with the  
44  
45 296 subject standing up and without clothes.

#### 46 47 297 **Other variables**

##### 48 49 298 **Clinical and sociodemographic variables**

50  
51 299 At the baseline visit, information on clinical and sociodemographic variables will also be  
52  
53 300 collected via questions about age, marital status, educational level and occupation.  
54  
55 301 Family history of cardiovascular disease and personal history of anxiety and/or  
56  
57  
58  
59  
60

1  
2  
3 302 depression, gestational diabetes, hypertension, dyslipidemia and the prescribed  
4  
5 303 pharmacological treatment (antiaggregants, anticoagulants, thyroid hormone treatment,  
6  
7 304 anxiolytics) will also be recorded, as well as the taking of NSAIDs in the last two weeks.  
8  
9 305 In subsequent visits, personal histories of cardiovascular disease, diabetes mellitus,  
10  
11 306 arterial hypertension or dyslipidemia in treatment, as well as the prescribed  
12  
13 307 pharmacological treatment (hypolipidemic, antihypertensive, antidiabetic) will also be  
14  
15 308 noted.

### 309 **Evaluation of chocolate consumption and habitual diet**

18 310 Chocolate consumption will be assessed at each evaluation visit by a series of  
19  
20 311 questions about the amount, type and frequency of consumption in the period between  
21  
22 312 visits.

24 313 Nutritional habits will be assessed by a 24-hour log on 3 non-consecutive days prior to  
25  
26 314 each visit.

### 315 **Evaluation of other lifestyles**

30 316 The use of tobacco will be assessed with a questionnaire on the personal history and  
31  
32 317 pattern of smoking.

34 318 Alcohol use will be recorded with a questionnaire covering the previous 7 days which  
35  
36 319 will include specific beverages and the amount by volume drunk of each.

38 320 Physical activity will be measured using the International Physical Activity  
39  
40 321 Questionnaire (IPAQ) in its short version and validated in Spanish.[61] This  
41  
42 322 questionnaire measures activity over the previous 7 days, classifying the subjects  
43  
44 323 according to three activity levels (low, moderate and high) with respect to three types of  
45  
46 324 activities: walking, moderate-intensity activities and vigorous-intensity activities. The  
47  
48 325 amount of physical exercise will be estimated in METs-minute/week.

### 326 **Evaluation of laboratory variables**

52 327 At baseline and follow-up visits at 6 months, we will measure plasma fasting glucose  
53  
54 328 values (mg/dL), glycated haemoglobin (%), total cholesterol (mg/dL), total triglycerides  
55  
56 329 (mg/dL), HDL cholesterol (mg/dL), LDL cholesterol (mg/dL), creatinine (mg/L),

1  
2  
3 330 insulinemia (mg/dL). Creatinine in urine (mg/dL) and microalbuminuria (mg/dL) will also  
4  
5 331 be measured. Insulin resistance will be determined using the HOMA index  
6  
7 332 (Homeostasis Model Assessment Insulin Resistance) estimated using the following  
8  
9 333 equation: Fasting glucose (mmol/l) X insulin (mU/ml)/22.5.

10 334 The evaluation visits will be made in the morning between 8:00 and 10:00 a.m. Each  
11  
12 335 participant will be informed prior to the visit to go fasting for at least 12 hours, having  
13  
14 336 avoided the 24 hours prior to visiting the consumption of polyphenol-rich foods,  
15  
16 337 including cocoa, chocolate, apples, and red wine as well as alcoholic drinks or the  
17  
18 338 performance of programmed physical activity. All evaluation visits, including blood  
19  
20 339 pressure measurements and evaluations of vascular function, will be carried out in a  
21  
22 340 room with conditions of lighting and temperature standardized, recommending that  
23  
24 341 patients attend the appointment with a prior rest of at least 8- 10 hours.

#### 25 26 27 342 **Data collection procedure, data management and monitoring**

28  
29 343 Data collection of the baseline and follow-up evaluation visits at 3 and 6 months will be  
30  
31 344 carried out by a nurse specifically trained to do so. The intervention visit after the  
32  
33 345 baseline evaluation will be carried out by another nurse, different from the one who  
34  
35 346 does the data collection. Each participant will have a unique identification code within  
36  
37 347 the study. All measurements will be compiled in a data collection notebook and kept in  
38  
39 348 a secure place that will remain closed within the health center. A database will be  
40  
41 349 created in SPSS to which only the members of the research team and the people  
42  
43 350 related to the statistical analyzes will have access. The principal investigator or a  
44  
45 351 person designated for this purpose will perform a weekly process of monitoring the  
46  
47 352 study, taking into account the inclusion of patients, cleaning and debugging of  
48  
49 353 databases and adaptation of the procedures to the protocol.

#### 50 51 354 **Blinding strategy:**

52  
53 355 Due to the nature of the intervention itself, the participants and the person responsible  
54  
55 356 for delivering the chocolate to IG participants, cannot be blinded. However, the person



1  
2  
3 357 responsible for carrying out the study measurements at each visit and for the statistical  
4  
5 358 analysis will be blind to the intervention.

6  
7 359 **Statistical analysis:**

8  
9 360 **General analysis**

10 361 Results for the quantitative variables will be expressed by mean  $\pm$  standard deviation or  
11  
12 362 by frequency distribution in the case of qualitative ones. The normality of the variables  
13  
14 363 will be assessed using the Kolmogorov-Smirnov test. In cases where a normal  
15  
16 364 distribution cannot be assumed, the corresponding nonparametric tests will be applied.  
17  
18 365 The association between independent qualitative variables will be analyzed by means  
19  
20 366 of the chi-square test or Fisher's exact test. The means between the two groups will be  
21  
22 367 compared using the Student's t test or the Mann-Whitney U test, and the Pearson or  
23  
24 368 Spearman correlation coefficients will be calculated to analyze the relationship between  
25  
26 369 quantitative variables.

27  
28 370 The analysis of the results for the main variable and the secondary variables will be  
29  
30 371 carried out by intention to treat. In addition, a secondary analysis will be run taking into  
31  
32 372 account chocolate intake adherence (< 50% days and > 50% days) and other relevant  
33  
34 373 subgroups in relation to their physical activity or previous chocolate consumption.

35  
36 374 All analyses will be performed with the SPSS version 23.0 (IBM Corporation, Armonk,  
37  
38 375 NY, USA) and an alpha risk of 0.05 will be set as the limit of statistical significance.

39  
40 376 **Analysis of the intervention's effect on primary and secondary outcomes.**

41  
42 377 To analyze the changes at 3 and 6 months from baseline in the primary outcome  
43  
44 378 (blood pressure) and in the secondary outcomes within the same group, the Student's t  
45  
46 379 test for paired data or the Wilcoxon test will be used. The McNemar test will be applied  
47  
48 380 with quantitative or dichotomous variables.

49  
50 381 Effects of the intervention will be analyzed in a comparison of the changes in blood  
51  
52 382 pressure and the secondary variables between the IG and the CG, using ANCOVA and  
53  
54 383 adjusting for possible confounders as the smoking status. Effects of the intervention  
55  
56 384 during follow-up will be studied with an analysis of the variance of repeated measures.

1  
2  
3 385 **Analysis by subgroups.**

4 386 The effect of the intervention could be influenced by age, sociocultural level and  
5  
6 387 adherence to the study's chocolate intake. The same analyses described above will be  
7  
8 388 performed for each of the aforementioned subgroups.  
9

10 389 **Secondary analyses.**

11  
12 390 A multivariate multiple regression analysis will be performed to identify the variables  
13  
14 391 with the greatest influence on blood pressure changes and the secondary variables  
15  
16 392 analyzed.  
17

18 393 **Methodological limitations:**

19  
20 394 Due to the nature of the intervention, the participating subjects cannot be blinded.  
21  
22 395 However, the researcher who analyses the data and the person who makes the  
23  
24 396 measurements during follow-up visits will be blinded with respect to the group to which  
25  
26 397 the participants belong. The smoking status in the 12 months prior to the time of  
27  
28 398 inclusion could influence the outcome measures related to vascular function and blood  
29  
30 399 pressure so, although participants will not be excluded for this reason, this aspect will  
31  
32 400 be controlled in statistical analysis. Assessment of the quality of life and lifestyles will  
33  
34 401 be carried out through self-reported data; however, previously validated instruments  
35  
36 402 will be used to obtain these. To make compliance with the intervention in the IG easier,  
37  
38 403 IG participants will be provided with instructions on eating the chocolate and a calendar  
39  
40 404 to record each intake.  
41  
42

43 405 **ETHICS AND DISSEMINATION**

44  
45 406 **Ethical considerations:**

46  
47 407 The study was approved by the Clinical Research Ethics Committee of the Salamanca  
48  
49 408 Health Area ("CREC of Health Area of Salamanca") in February 2018. A SPIRIT  
50  
51 409 checklist is available for this protocol. The clinical trial has been registered at  
52  
53 410 ClinicalTrials.gov with the identifier NCT03492983.  
54  
55  
56  
57  
58  
59  
60

1  
2  
3 411 Participants must sign informed consent in accordance with the Declaration of Helsinki.  
4  
5 412 Subjects will be informed of the objectives of the project and the risks and benefits of  
6  
7 413 the explorations to be carried out, including sample collection. None of the tests will  
8  
9 414 pose risks that could endanger the lives of participants. Confidentiality of participant  
10  
11 415 data will be guaranteed at all times in accordance with the provisions of the Organic  
12  
13 416 Law on the Protection of Personal Data (15/1999 of December 13, LOPD), and under  
14  
15 417 the conditions established by Law 14/2007 of biomedical research.

16  
17 418 **Dissemination plan:**

18  
19 419 The research group plans to achieve rapid and widespread dissemination of results to  
20  
21 420 ensure maximum visibility of this study. To this end, the results of the study will be  
22  
23 421 published in open-access scientific journals with peer review. At least one publication  
24  
25 422 of the main results and others with the secondary results are planned. This will be  
26  
27 423 complemented by presentation of the results of the study at relevant scientific  
28  
29 424 conferences and seminars of national and international scope. In addition, a doctoral  
30  
31 425 thesis based on this project will be prepared. Appropriate dissemination will likewise be  
32  
33 426 carried out through social networks and other media. Moreover, given the involvement  
34  
35 427 of a commercial product, the transfer to clinical practice is expected to be very fast if  
36  
37 428 the results are as expected.

38  
39 429 **DISCUSSION**

40  
41 430 In recent years, there has been an increase in attention to polyphenols and their  
42  
43 431 beneficial effects on health, with numerous studies being carried out to assess this.[19,  
44  
45 432 21] Similarly, the therapeutic use of these compounds has been suggested for certain  
46  
47 433 diseases or population groups.[36, 62] The menopause increases the risk of  
48  
49 434 developing cardiovascular disease compared to the previous period.[45] However, we  
50  
51 435 have not found any study that assesses the effect of adding commercially available  
52  
53 436 chocolate high in cocoa content to the usual diet in this population at special risk.  
54  
55 437 Similarly, no studies have been found that evaluate the effects on cognitive

1  
2  
3 438 performance, quality of life and body composition of adding commercial chocolate with  
4  
5 439 high cocoa content to the usual diet in postmenopausal women.  
6  
7 440 The results of this work will provide new evidence in this regard for the development of  
8  
9 441 strategies in nutritional education of particularly vulnerable populations, given their high  
10  
11 442 risk of developing cardiovascular disease, including non-pharmacological therapies and  
12  
13 443 strategies that employ lifestyle modification. This intervention may also have  
14  
15 444 implications for the preparation of recommendations in clinical practice guidelines and  
16  
17 445 quality improvement programs aimed at the care of postmenopausal women.  
18  
19  
20  
21  
22  
23  
24  
25  
26  
27  
28  
29  
30  
31  
32  
33  
34  
35  
36  
37  
38  
39  
40  
41  
42  
43  
44  
45  
46  
47  
48  
49  
50  
51  
52  
53  
54  
55  
56  
57  
58  
59  
60

## 446 REFERENCES

- 447 1. Grassi D, Desideri G, Ferri C. Flavonoids: antioxidants against atherosclerosis. *Nutrients*  
448 2010;2(8):889-902. doi: 10.3390/nu2080889 [published Online First: 2010/08/01]
- 449 2. Grassi D, Desideri G, Croce G, et al. Flavonoids, vascular function and cardiovascular  
450 protection. *Curr Pharm Des* 2009;15(10):1072-84. [published Online First: 2009/04/10]
- 451 3. Visioli F, Bernaert H, Corti R, et al. Chocolate, lifestyle, and health. *Crit Rev Food Sci Nutr*  
452 2009;49(4):299-312. doi: 10.1080/10408390802066805 [published Online First:  
453 2009/02/24]
- 454 4. Cos P, De Bruyne T, Hermans N, et al. Proanthocyanidins in health care: current and new  
455 trends. *Curr Med Chem* 2004;11(10):1345-59. [published Online First: 2004/05/12]
- 456 5. Grassi D, Desideri G, Ferri C. Blood pressure and cardiovascular risk: what about cocoa and  
457 chocolate? *Arch Biochem Biophys* 2010;501(1):112-5. doi: 10.1016/j.abb.2010.05.020  
458 [published Online First: 2010/05/25]
- 459 6. Mink PJ, Scrafford CG, Barraj LM, et al. Flavonoid intake and cardiovascular disease  
460 mortality: a prospective study in postmenopausal women. *Am J Clin Nutr*  
461 2007;85(3):895-909. doi: 10.1093/ajcn/85.3.895 [published Online First: 2007/03/09]
- 462 7. Ramos S, Martin MA, Goya L. Effects of Cocoa Antioxidants in Type 2 Diabetes Mellitus.  
463 *Antioxidants (Basel)* 2017;6(4) doi: 10.3390/antiox6040084 [published Online First:  
464 2017/11/01]
- 465 8. Osakabe N. Flavan 3-ols improve metabolic syndrome risk factors: evidence and  
466 mechanisms. *J Clin Biochem Nutr* 2013;52(3):186-92. doi: 10.3164/jcfn.12-130  
467 [published Online First: 2013/05/25]
- 468 9. Engler MB, Engler MM, Chen CY, et al. Flavonoid-rich dark chocolate improves endothelial  
469 function and increases plasma epicatechin concentrations in healthy adults. *J Am Coll*  
470 *Nutr* 2004;23(3):197-204. [published Online First: 2004/06/11]
- 471 10. Ottaviani JI, Heiss C, Spencer JPE, et al. Recommending flavanols and procyanidins for  
472 cardiovascular health: Revisited. *Mol Aspects Med* 2018;61:63-75. doi:  
473 10.1016/j.mam.2018.02.001 [published Online First: 2018/02/11]
- 474 11. Ludovici V, Barthelmes J, Nagele MP, et al. Cocoa, Blood Pressure, and Vascular Function.  
475 *Front Nutr* 2017;4:36. doi: 10.3389/fnut.2017.00036 [published Online First:  
476 2017/08/22]
- 477 12. Ried K, Fakler P, Stocks NP. Effect of cocoa on blood pressure. *Cochrane Database Syst Rev*  
478 2017;4:CD008893. doi: 10.1002/14651858.CD008893.pub3 [published Online First:  
479 2017/04/26]
- 480 13. Heiss C, Sansone R, Karimi H, et al. Impact of cocoa flavanol intake on age-dependent  
481 vascular stiffness in healthy men: a randomized, controlled, double-masked trial. *Age*  
482 *(Dordr)* 2015;37(3):9794. doi: 10.1007/s11357-015-9794-9 [published Online First:  
483 2015/05/28]
- 484 14. Grassi D, Desideri G, Necozone S, et al. Cocoa consumption dose-dependently improves  
485 flow-mediated dilation and arterial stiffness decreasing blood pressure in healthy  
486 individuals. *J Hypertens* 2015;33(2):294-303. doi: 10.1097/hjh.0000000000000412  
487 [published Online First: 2014/11/08]
- 488 15. Crews WD, Jr., Harrison DW, Wright JW. A double-blind, placebo-controlled, randomized  
489 trial of the effects of dark chocolate and cocoa on variables associated with  
490 neuropsychological functioning and cardiovascular health: clinical findings from a  
491 sample of healthy, cognitively intact older adults. *Am J Clin Nutr* 2008;87(4):872-80.  
492 [published Online First: 2008/04/11]
- 493 16. Dower JI, Geleijnse JM, Gijsbers L, et al. Effects of the pure flavonoids epicatechin and  
494 quercetin on vascular function and cardiometabolic health: a randomized, double-  
495 blind, placebo-controlled, crossover trial. *Am J Clin Nutr* 2015;101(5):914-21. doi:  
496 10.3945/ajcn.114.098590 [published Online First: 2015/05/03]

- 1  
2  
3 497 17. Modena MG. Hypertension in postmenopausal women: how to approach hypertension in  
4 498 menopause. *High Blood Press Cardiovasc Prev* 2014;21(3):201-4. doi: 10.1007/s40292-  
5 499 014-0057-0 [published Online First: 2014/05/24]  
6 500 18. Zilberman JM, Cerezo GH, Del Sueldo M, et al. Association Between Hypertension,  
7 501 Menopause, and Cognition in Women. *J Clin Hypertens (Greenwich)* 2015;17(12):970-  
8 502 6. doi: 10.1111/jch.12643 [published Online First: 2015/08/08]  
9 503 19. Okamoto T, Kobayashi R, Natsume M, et al. Habitual cocoa intake reduces arterial stiffness  
10 504 in postmenopausal women regardless of intake frequency: a randomized parallel-  
11 505 group study. *Clin Interv Aging* 2016;11:1645-52. doi: 10.2147/cia.s118152 [published  
12 506 Online First: 2016/11/25]  
13 507 20. Koli R, Kohler K, Tonteri E, et al. Dark chocolate and reduced snack consumption in mildly  
14 508 hypertensive adults: an intervention study. *Nutr J* 2015;14:84. doi: 10.1186/s12937-  
15 509 015-0075-3 [published Online First: 2015/08/25]  
16 510 21. West SG, McIntyre MD, Piotrowski MJ, et al. Effects of dark chocolate and cocoa  
17 511 consumption on endothelial function and arterial stiffness in overweight adults. *Br J*  
18 512 *Nutr* 2014;111(4):653-61. doi: 10.1017/s0007114513002912 [published Online First:  
19 513 2013/11/28]  
20 514 22. Basu A, Betts NM, Leyva MJ, et al. Acute Cocoa Supplementation Increases Postprandial  
21 515 HDL Cholesterol and Insulin in Obese Adults with Type 2 Diabetes after Consumption  
22 516 of a High-Fat Breakfast. *J Nutr* 2015;145(10):2325-32. doi: 10.3945/jn.115.215772  
23 517 [published Online First: 2015/09/05]  
24 518 23. Scholey AB, French SJ, Morris PJ, et al. Consumption of cocoa flavanols results in acute  
25 519 improvements in mood and cognitive performance during sustained mental effort. *J*  
26 520 *Psychopharmacol* 2010;24(10):1505-14. doi: 10.1177/0269881109106923 [published  
27 521 Online First: 2009/11/28]  
28 522 24. Field DT, Williams CM, Butler LT. Consumption of cocoa flavanols results in an acute  
29 523 improvement in visual and cognitive functions. *Physiol Behav* 2011;103(3-4):255-60.  
30 524 doi: 10.1016/j.physbeh.2011.02.013 [published Online First: 2011/02/18]  
31 525 25. Sorond FA, Hurwitz S, Salat DH, et al. Neurovascular coupling, cerebral white matter  
32 526 integrity, and response to cocoa in older people. *Neurology* 2013;81(10):904-9. doi:  
33 527 10.1212/WNL.0b013e3182a351aa [published Online First: 2013/08/09]  
34 528 26. Socci V, Tempesta D, Desideri G, et al. Enhancing Human Cognition with Cocoa Flavonoids.  
35 529 *Front Nutr* 2017;4:19. doi: 10.3389/fnut.2017.00019 [published Online First:  
36 530 2017/06/01]  
37 531 27. Mastroiacovo D, Kwik-Urbe C, Grassi D, et al. Cocoa flavanol consumption improves  
38 532 cognitive function, blood pressure control, and metabolic profile in elderly subjects:  
39 533 the Cocoa, Cognition, and Aging (CoCoA) Study--a randomized controlled trial. *Am J*  
40 534 *Clin Nutr* 2015;101(3):538-48. doi: 10.3945/ajcn.114.092189 [published Online First:  
41 535 2015/03/04]  
42 536 28. Grassi D, Socci V, Tempesta D, et al. Flavanol-rich chocolate acutely improves arterial  
43 537 function and working memory performance counteracting the effects of sleep  
44 538 deprivation in healthy individuals. *J Hypertens* 2016;34(7):1298-308. doi:  
45 539 10.1097/hjh.0000000000000926 [published Online First: 2016/04/19]  
46 540 29. Crichton GE, Elias MF, Alkerwi A. Chocolate intake is associated with better cognitive  
47 541 function: The Maine-Syracuse Longitudinal Study. *Appetite* 2016;100:126-32. doi:  
48 542 10.1016/j.appet.2016.02.010 [published Online First: 2016/02/14]  
49 543 30. Masee LA, Ried K, Pase M, et al. The acute and sub-chronic effects of cocoa flavanols on  
50 544 mood, cognitive and cardiovascular health in young healthy adults: a randomized,  
51 545 controlled trial. *Front Pharmacol* 2015;6:93. doi: 10.3389/fphar.2015.00093 [published  
52 546 Online First: 2015/06/05]  
53  
54  
55  
56  
57  
58  
59  
60

- 1  
2  
3 547 31. Nehlig A. The neuroprotective effects of cocoa flavanol and its influence on cognitive  
4 548 performance. *Br J Clin Pharmacol* 2013;75(3):716-27. doi: 10.1111/j.1365-  
5 549 2125.2012.04378.x [published Online First: 2012/07/11]  
6 550 32. Nurk E, Refsum H, Drevon CA, et al. Intake of flavonoid-rich wine, tea, and chocolate by  
7 551 elderly men and women is associated with better cognitive test performance. *J Nutr*  
8 552 2009;139(1):120-7. doi: 10.3945/jn.108.095182 [published Online First: 2008/12/06]  
9 553 33. Neshatdoust S, Saunders C, Castle SM, et al. High-flavonoid intake induces cognitive  
10 554 improvements linked to changes in serum brain-derived neurotrophic factor: Two  
11 555 randomised, controlled trials. *Nutr Healthy Aging* 2016;4(1):81-93. doi: 10.3233/nha-  
12 556 1615 [published Online First: 2016/12/31]  
13 557 34. Marsh CE, Carter HH, Guelfi KJ, et al. Brachial and Cerebrovascular Functions Are Enhanced  
14 558 in Postmenopausal Women after Ingestion of Chocolate with a High Concentration of  
15 559 Cocoa. *J Nutr* 2017;147(9):1686-92. doi: 10.3945/jn.117.250225 [published Online  
16 560 First: 2017/08/11]  
17 561 35. Balboa-Castillo T, Lopez-Garcia E, Leon-Munoz LM, et al. Chocolate and health-related  
18 562 quality of life: a prospective study. *PLoS One* 2015;10(4):e0123161. doi:  
19 563 10.1371/journal.pone.0123161 [published Online First: 2015/04/23]  
20 564 36. Costa de Miranda R, Paiva ES, Suter Correia Cadena SM, et al. Polyphenol-Rich Foods  
21 565 Alleviate Pain and Ameliorate Quality of Life in Fibromyalgic Women. *Int J Vitam Nutr*  
22 566 *Res* 2016;1-10. doi: 10.1024/0300-9831/a000253 [published Online First: 2016/11/22]  
23 567 37. Dmitruk A, Czezelewski J, Czezelewska E, et al. Body composition and fatty tissue  
24 568 distribution in women with various menstrual status. *Rocz Panstw Zakl Hig*  
25 569 2018;69(1):95-101. [published Online First: 2018/03/10]  
26 570 38. Davison K, Coates AM, Buckley JD, et al. Effect of cocoa flavanols and exercise on  
27 571 cardiometabolic risk factors in overweight and obese subjects. *Int J Obes (Lond)*  
28 572 2008;32(8):1289-96. doi: 10.1038/ijo.2008.66 [published Online First: 2008/05/28]  
29 573 39. Cuenca-Garcia M, Ruiz JR, Ortega FB, et al. Association between chocolate consumption  
30 574 and fatness in European adolescents. *Nutrition* 2014;30(2):236-9. doi:  
31 575 10.1016/j.nut.2013.07.011 [published Online First: 2013/10/22]  
32 576 40. Ayoobi N, Jafarirad S, Haghighizadeh MH, et al. Protective Effect of Dark Chocolate on  
33 577 Cardiovascular Disease Factors and Body Composition in Type 2 Diabetes: A Parallel,  
34 578 Randomized, Clinical Trial. *Iran Red Crescent Med J* 2017;19(8):e21644. doi:  
35 579 10.5812/ircmj.21644 [published Online First: 2017-08-01]  
36 580 41. Di Renzo L, Rizzo M, Sarlo F, et al. Effects of dark chocolate in a population of normal  
37 581 weight obese women: a pilot study. *Eur Rev Med Pharmacol Sci* 2013;17(16):2257-66.  
38 582 [published Online First: 2013/07/31]  
39 583 42. González-Sarrías A, Combet E, Pinto P, et al. A Systematic Review and Meta-Analysis of the  
40 584 Effects of Flavanol-Containing Tea, Cocoa and Apple Products on Body Composition  
41 585 and Blood Lipids: Exploring the Factors Responsible for Variability in Their Efficacy.  
42 586 *Nutrients* 2017;9(7):746.  
43 587 43. Kord-Varkaneh H, Ghaedi E, Nazary-Vanani A, et al. Does cocoa/dark chocolate  
44 588 supplementation have favorable effect on body weight, body mass index and waist  
45 589 circumference? A systematic review, meta-analysis and dose-response of randomized  
46 590 clinical trials. *Crit Rev Food Sci Nutr* 2018;0. doi: 10.1080/10408398.2018.1451820  
47 591 [published Online First: 2018/03/20]  
48 592 44. Greenberg JA, Buijsse B. Habitual chocolate consumption may increase body weight in a  
49 593 dose-response manner. *PLoS One* 2013;8(8):e70271. doi:  
50 594 10.1371/journal.pone.0070271 [published Online First: 2013/08/21]  
51 595 45. Agrinier N, Cournot M, Dallongeville J, et al. Menopause and modifiable coronary heart  
52 596 disease risk factors: a population based study. *Maturitas* 2010;65(3):237-43. doi:  
53 597 10.1016/j.maturitas.2009.11.023 [published Online First: 2009/12/25]  
54  
55  
56  
57  
58  
59

- 1  
2  
3 598 46. Consellería de Sanidade Xunta de Galicia. Spain; Pan American Organization health (PAHO-  
4 599 WHO); CES University C. Epidat: program for epidemiological data analysis. Version  
5 600 4.2Julio 2016.
- 6 601 47. Scientific Opinion on the substantiation of a health claim related to cocoa flavanols and  
7 602 maintenance of normal endothelium-dependent vasodilation pursuant to Article 13(5)  
8 603 of Regulation (EC) No 1924/2006. *EFSA Journal* 2012;10(7):2809. doi:  
9 604 doi:10.2903/j.efsa.2012.2809
- 10 605 48. 2013 Practice guidelines for the management of arterial hypertension of the European  
11 606 Society of Hypertension (ESH) and the European Society of Cardiology (ESC): ESH/ESC  
12 607 Task Force for the Management of Arterial Hypertension. *J Hypertens*  
13 608 2013;31(10):1925-38. doi: 10.1097/HJH.0b013e328364ca4c [published Online First:  
14 609 2013/10/11]
- 15 610 49. Shirai K, Hiruta N, Song M, et al. Cardio-ankle vascular index (CAVI) as a novel indicator of  
16 611 arterial stiffness: theory, evidence and perspectives. *J Atheroscler Thromb*  
17 612 2011;18(11):924-38. [published Online First: 2011/06/02]
- 18 613 50. Ohkuma T, Tomiyama H, Ninomiya T, et al. Proposed Cutoff Value of Brachial-Ankle Pulse  
19 614 Wave Velocity for the Management of Hypertension. *Circ J* 2017;81(10):1540-42. doi:  
20 615 10.1253/circj.CJ-17-0636 [published Online First: 2017/08/25]
- 21 616 51. Korkmaz L, Erkan H, Korkmaz AA, et al. Relationship of aortic knob width with cardio-ankle  
22 617 vascular stiffness index and its value in diagnosis of subclinical atherosclerosis in  
23 618 hypertensive patients: a study on diagnostic accuracy. *Anadolu Kardiyol Derg*  
24 619 2012;12(2):102-6. doi: 10.5152/akd.2012.034 [published Online First: 2012/01/28]
- 25 620 52. Reitan RM. Trail Making Test. Tucson: Reitan Neuropsychology Laboratory 1992.
- 26 621 53. Rey A. L'examen clinique en psychologie. Paris: Presses universitaires de France 1964.
- 27 622 54. Wechsler D. WMS-R Wechsler memory scale. San Antonio, Texas: The Psychological  
28 623 Corporation 1987.
- 29 624 55. Valencia NJ, Laserna, J. A., Pérez-García, M., Orozco, C., Miñán, M., Garrido, C., Morente, G.  
30 625 Influencia de la escolaridad y el sexo sobre la ejecución en el FAS, nombrar animales y  
31 626 nombrar frutas. *Psicología Conductual* 2000;8(2):283-95.
- 32 627 56. Goodglass H KE. Evaluación de la Afasia y de Trastornos Relacionados1986.
- 33 628 57. Badia X, Schiaffino A, Alonso J, et al. Using the EuroQol 5-D in the Catalan general  
34 629 population: feasibility and construct validity. *Qual Life Res* 1998;7(4):311-22.  
35 630 [published Online First: 1998/06/04]
- 36 631 58. Palacios S, Ferrer-Barriendos J, Parrilla JJ, et al. [Health-related quality of life in the Spanish  
37 632 women through and beyond menopause. Development and validation of the  
38 633 Cervantes Scale]. *Med Clin (Barc)* 2004;122(6):205-11. [published Online First:  
39 634 2004/03/12]
- 40 635 59. Karelis AD, Chamberland G, Aubertin-Leheudre M, et al. Validation of a portable  
41 636 bioelectrical impedance analyzer for the assessment of body composition. *Appl Physiol*  
42 637 *Nutr Metab* 2013;38(1):27-32. doi: 10.1139/apnm-2012-0129 [published Online First:  
43 638 2013/02/02]
- 44 639 60. Salas-Salvado J, Rubio MA, Barbany M, et al. [SEEDO 2007 Consensus for the evaluation of  
45 640 overweight and obesity and the establishment of therapeutic intervention criteria].  
46 641 *Med Clin (Barc)* 2007;128(5):184-96; quiz 1 p following 200. [published Online First:  
47 642 2007/02/15]
- 48 643 61. Roman Vinas B, Ribas Barba L, Ngo J, et al. [Validity of the international physical activity  
49 644 questionnaire in the Catalan population (Spain)]. *Gac Sanit* 2013;27(3):254-7. doi:  
50 645 10.1016/j.gaceta.2012.05.013 [published Online First: 2012/10/30]
- 51 646 62. Islam MA, Alam F, Solayman M, et al. Dietary Phytochemicals: Natural Swords Combating  
52 647 Inflammation and Oxidation-Mediated Degenerative Diseases. *Oxid Med Cell Longev*  
53 648 2016;2016:5137431. doi: 10.1155/2016/5137431 [published Online First: 2016/10/11]



1  
2  
3 649

4 650 **AUTHORS' CONTRIBUTIONS:**

5  
6 651 JIR, JAM, LGO and IGY contributed to the conception and design of the study. IGY,  
7  
8 652 JIR and JAM prepared the manuscript of the study protocol. JIR, JAM, LGO, RAD,  
9  
10 653 SMS, JGS, SMG, ERS, MGM and IGY contributed to the development of the study  
11  
12 654 protocol. JIR, JAM, LGO, RAD, SMS, JGS, SMG, ERS, MGM and IGY provided  
13  
14 655 assistance with statistical methodology and knowledge. JIR, JAM, LGO, RAD, SMS,  
15  
16 656 JGS, SMG, ERS, MGM and IGY provided a critical review of the manuscript.  
17  
18 657 All authors have read and accepted the final version of the protocol.

19  
20 658 **FUNDING STATEMENT:**

21  
22 659 This study was supported in part by grants funded by la Gerencia Regional de Castilla  
23  
24 660 y León (GRS 1583/B/17).  
25  
26 661 "Lindt & Sprüngli will provide the necessary chocolate for the implementation of the  
27  
28 662 study. This company will not play any role in the design of the study, data analysis,  
29  
30 663 reporting of results, or the decision to present the manuscript for publication".

31  
32 664 **COMPETING INTERESTS STATEMENT:**

33  
34 665 The authors declare that they have no conflicts of interest.

35  
36 666 **ACKNOWLEDGMENTS:**

37  
38 667 The authors are grateful to all the professionals involved in the ECCAMP study:  
39  
40 668 José I Recio-Rodríguez, José A Maderuelo-Fernández, Luis García-Ortiz, Manuel A  
41  
42 669 Gómez-Marcos, Irene A García-Yu, Rosario Alonso-Domínguez, Sara Mora-Simón,  
43  
44 670 Natalia Sánchez-Aguadero, Jesús González-Sánchez, Cristina Agudo-Conde, Cristina  
45  
46 671 Lugones-Sánchez, Benigna Sánchez-Salgado, Carmen Castaño-Sánchez, Emiliano  
47  
48 672 Rodríguez-Sánchez, Susana González-Manzano, Olaya Tamayo-Morales, Susana  
49  
50 673 González-Sánchez.

51  
52 674 **FIGURE LEGEND:**

53  
54 675 Figure 1. Study flow chart

55  
56 676 Table 1. Polyphenol composition of 99% cocoa chocolate

677

678 **Table 1.** Polyphenols composition of 99% cocoa chocolate.

| Compounds                      | Quantity      |
|--------------------------------|---------------|
| Protocatechuic acid (mg/g)     | 0.058 ± 0.008 |
| Procyanidin dimer (B3) (mg/g)  | 0.176 ± 0.013 |
| Catechin (mg/g)                | 1.035 ± 0.105 |
| Procyanidin dimer (B2) (mg/g)  | 1.440 ± 0.055 |
| Epicatechin (mg/g)             | 2.610 ± 0.075 |
| Procyanidin trimer (C1) (mg/g) | 0.853 ± 0.024 |
| Procyanidin A hexoside (mg/g)  | 0.354 ± 0.007 |
| Quercetin glucoside (mg/g)     | 0.002 ± 0.000 |
| Quercetin arabinoside (mg/g)   | 0.003 ± 0.001 |

679

Figure 1. Study flow-chart

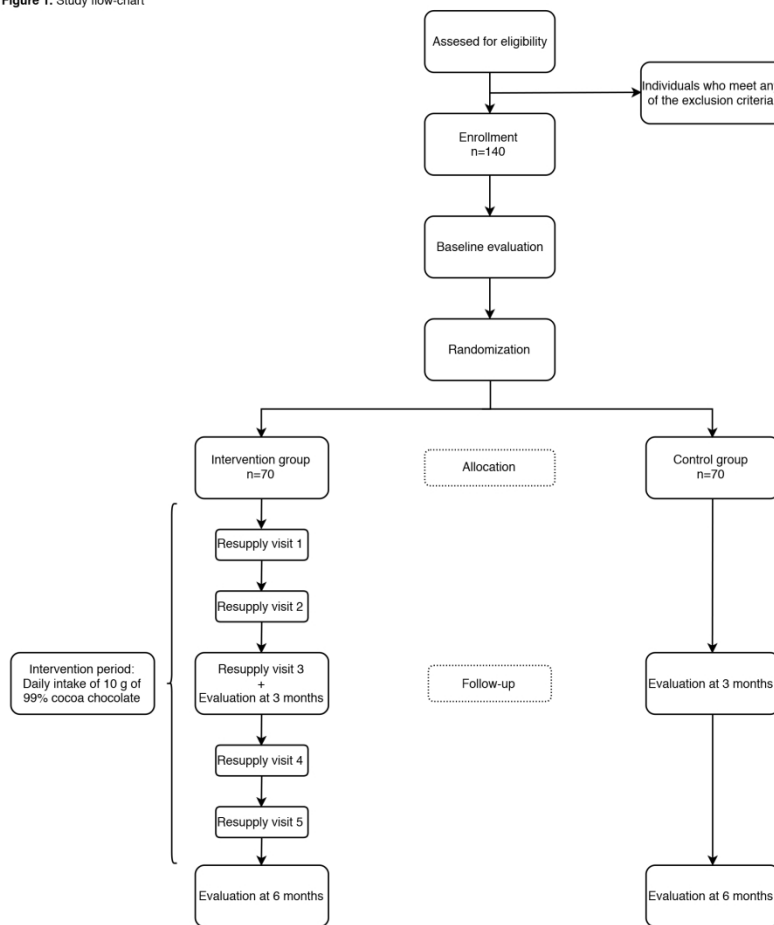

Figure 1

157x222mm (300 x 300 DPI)

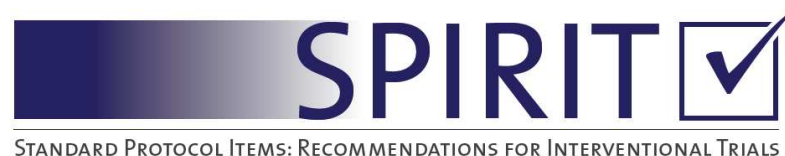

SPIRIT 2013 Checklist: Recommended items to address in a clinical trial protocol and related documents\*

| Section/item                      | Item No | Description                                                                                                                                                                                                                                                                              | Addressed on page number |
|-----------------------------------|---------|------------------------------------------------------------------------------------------------------------------------------------------------------------------------------------------------------------------------------------------------------------------------------------------|--------------------------|
| <b>Administrative information</b> |         |                                                                                                                                                                                                                                                                                          |                          |
| Title                             | 1       | Descriptive title identifying the study design, population, interventions, and, if applicable, trial acronym                                                                                                                                                                             | Pag 1, line 1            |
| Trial registration                | 2a      | Trial identifier and registry name. If not yet registered, name of intended registry                                                                                                                                                                                                     | Pag 2, line 50           |
|                                   | 2b      | All items from the World Health Organization Trial Registration Data Set                                                                                                                                                                                                                 | NA                       |
| Protocol version                  | 3       | Date and version identifier                                                                                                                                                                                                                                                              | NA                       |
| Funding                           | 4       | Sources and types of financial, material, and other support                                                                                                                                                                                                                              | Pag 22, line 659         |
| Roles and responsibilities        | 5a      | Names, affiliations, and roles of protocol contributors                                                                                                                                                                                                                                  | Pag 22, line 651         |
|                                   | 5b      | Name and contact information for the trial sponsor                                                                                                                                                                                                                                       | Pag 22, line 659         |
|                                   | 5c      | Role of study sponsor and funders, if any, in study design; collection, management, analysis, and interpretation of data; writing of the report; and the decision to submit the report for publication, including whether they will have ultimate authority over any of these activities | Pag 22, line 662         |
|                                   | 5d      | Composition, roles, and responsibilities of the coordinating centre, steering committee, endpoint adjudication committee, data management team, and other individuals or groups overseeing the trial, if applicable (see Item 21a for data monitoring committee)                         | Pag 22, line 651         |

## Introduction

|                          |    |                                                                                                                                                                                                           |                 |
|--------------------------|----|-----------------------------------------------------------------------------------------------------------------------------------------------------------------------------------------------------------|-----------------|
| Background and rationale | 6a | Description of research question and justification for undertaking the trial, including summary of relevant studies (published and unpublished) examining benefits and harms for each intervention        | Pag 6, line 151 |
|                          | 6b | Explanation for choice of comparators                                                                                                                                                                     | Pag 6, line 151 |
| Objectives               | 7  | Specific objectives or hypotheses                                                                                                                                                                         | Pag 6, line 158 |
| Trial design             | 8  | Description of trial design including type of trial (eg, parallel group, crossover, factorial, single group), allocation ratio, and framework (eg, superiority, equivalence, noninferiority, exploratory) | Pag 7, line 164 |

## Methods: Participants, interventions, and outcomes

|                      |     |                                                                                                                                                                                                                                                                                                                                                                                |                 |
|----------------------|-----|--------------------------------------------------------------------------------------------------------------------------------------------------------------------------------------------------------------------------------------------------------------------------------------------------------------------------------------------------------------------------------|-----------------|
| Study setting        | 9   | Description of study settings (eg, community clinic, academic hospital) and list of countries where data will be collected. Reference to where list of study sites can be obtained                                                                                                                                                                                             | Pag 7, line 164 |
| Eligibility criteria | 10  | Inclusion and exclusion criteria for participants. If applicable, eligibility criteria for study centres and individuals who will perform the interventions (eg, surgeons, psychotherapists)                                                                                                                                                                                   | Pag 7, line 175 |
| Interventions        | 11a | Interventions for each group with sufficient detail to allow replication, including how and when they will be administered                                                                                                                                                                                                                                                     | Pag 8, line 204 |
|                      | 11b | Criteria for discontinuing or modifying allocated interventions for a given trial participant (eg, drug dose change in response to harms, participant request, or improving/worsening disease)                                                                                                                                                                                 | NA              |
|                      | 11c | Strategies to improve adherence to intervention protocols, and any procedures for monitoring adherence (eg, drug tablet return, laboratory tests)                                                                                                                                                                                                                              | Pag 8, line 214 |
|                      | 11d | Relevant concomitant care and interventions that are permitted or prohibited during the trial                                                                                                                                                                                                                                                                                  | Pag 8, line 208 |
| Outcomes             | 12  | Primary, secondary, and other outcomes, including the specific measurement variable (eg, systolic blood pressure), analysis metric (eg, change from baseline, final value, time to event), method of aggregation (eg, median, proportion), and time point for each outcome. Explanation of the clinical relevance of chosen efficacy and harm outcomes is strongly recommended | Pag 9, line 235 |
| Participant timeline | 13  | Time schedule of enrolment, interventions (including any run-ins and washouts), assessments, and visits for participants. A schematic diagram is highly recommended (see Figure)                                                                                                                                                                                               | Figure 1        |

1  
2  
3 Sample size 14 Estimated number of participants needed to achieve study objectives and how it was determined, including Pag 7, line 190  
4 clinical and statistical assumptions supporting any sample size calculations

5  
6 Recruitment 15 Strategies for achieving adequate participant enrolment to reach target sample size Pag 7, line 182  
7

8 **Methods: Assignment of interventions (for controlled trials)**  
9

10 Allocation:

11  
12 Sequence generation 16a Method of generating the allocation sequence (eg, computer-generated random numbers), and list of any Pag 8, line 199  
13 factors for stratification. To reduce predictability of a random sequence, details of any planned restriction  
14 (eg, blocking) should be provided in a separate document that is unavailable to those who enrol participants  
15 or assign interventions  
16

17 Allocation concealment mechanism 16b Mechanism of implementing the allocation sequence (eg, central telephone; sequentially numbered, Pag 8, line 199  
18 opaque, sealed envelopes), describing any steps to conceal the sequence until interventions are assigned  
19  
20

21 Implementation 16c Who will generate the allocation sequence, who will enrol participants, and who will assign participants to Pag 8, line 200  
22 interventions  
23

24 Blinding (masking) 17a Who will be blinded after assignment to interventions (eg, trial participants, care providers, outcome Pag 13, line 355  
25 assessors, data analysts), and how  
26

27 17b If blinded, circumstances under which unblinding is permissible, and procedure for revealing a participant's Pag 13, line 355  
28 allocated intervention during the trial  
29  
30

31 **Methods: Data collection, management, and analysis**  
32

33 Data collection methods 18a Plans for assessment and collection of outcome, baseline, and other trial data, including any related Pag 9, line 238  
34 processes to promote data quality (eg, duplicate measurements, training of assessors) and a description of  
35 study instruments (eg, questionnaires, laboratory tests) along with their reliability and validity, if known.  
36 Reference to where data collection forms can be found, if not in the protocol  
37

38 18b Plans to promote participant retention and complete follow-up, including list of any outcome data to be NA  
39 collected for participants who discontinue or deviate from intervention protocols  
40  
41  
42  
43  
44

|    |                     |     |                                                                                                                                                                                                                                                                   |                  |
|----|---------------------|-----|-------------------------------------------------------------------------------------------------------------------------------------------------------------------------------------------------------------------------------------------------------------------|------------------|
| 1  |                     |     |                                                                                                                                                                                                                                                                   |                  |
| 2  |                     |     |                                                                                                                                                                                                                                                                   |                  |
| 3  | Data management     | 19  | Plans for data entry, coding, security, and storage, including any related processes to promote data quality (eg, double data entry; range checks for data values). Reference to where details of data management procedures can be found, if not in the protocol | Pag 13, line 343 |
| 4  |                     |     |                                                                                                                                                                                                                                                                   |                  |
| 5  |                     |     |                                                                                                                                                                                                                                                                   |                  |
| 6  |                     |     |                                                                                                                                                                                                                                                                   |                  |
| 7  | Statistical methods | 20a | Statistical methods for analysing primary and secondary outcomes. Reference to where other details of the statistical analysis plan can be found, if not in the protocol                                                                                          | Pag 14, line 377 |
| 8  |                     |     |                                                                                                                                                                                                                                                                   |                  |
| 9  |                     |     |                                                                                                                                                                                                                                                                   |                  |
| 10 |                     | 20b | Methods for any additional analyses (eg, subgroup and adjusted analyses)                                                                                                                                                                                          | Pag 15, line 385 |
| 11 |                     |     |                                                                                                                                                                                                                                                                   |                  |
| 12 |                     | 20c | Definition of analysis population relating to protocol non-adherence (eg, as randomised analysis), and any statistical methods to handle missing data (eg, multiple imputation)                                                                                   | Pag 15, line 387 |
| 13 |                     |     |                                                                                                                                                                                                                                                                   |                  |
| 14 |                     |     |                                                                                                                                                                                                                                                                   |                  |

### 15 **Methods: Monitoring**

|    |                 |     |                                                                                                                                                                                                                                                                                                                                       |    |
|----|-----------------|-----|---------------------------------------------------------------------------------------------------------------------------------------------------------------------------------------------------------------------------------------------------------------------------------------------------------------------------------------|----|
| 16 |                 |     |                                                                                                                                                                                                                                                                                                                                       |    |
| 17 | Data monitoring | 21a | Composition of data monitoring committee (DMC); summary of its role and reporting structure; statement of whether it is independent from the sponsor and competing interests; and reference to where further details about its charter can be found, if not in the protocol. Alternatively, an explanation of why a DMC is not needed | NA |
| 18 |                 |     |                                                                                                                                                                                                                                                                                                                                       |    |
| 19 |                 |     |                                                                                                                                                                                                                                                                                                                                       |    |
| 20 |                 |     |                                                                                                                                                                                                                                                                                                                                       |    |
| 21 |                 |     |                                                                                                                                                                                                                                                                                                                                       |    |
| 22 |                 | 21b | Description of any interim analyses and stopping guidelines, including who will have access to these interim results and make the final decision to terminate the trial                                                                                                                                                               | NA |
| 23 |                 |     |                                                                                                                                                                                                                                                                                                                                       |    |
| 24 |                 |     |                                                                                                                                                                                                                                                                                                                                       |    |
| 25 | Harms           | 22  | Plans for collecting, assessing, reporting, and managing solicited and spontaneously reported adverse events and other unintended effects of trial interventions or trial conduct                                                                                                                                                     | NA |
| 26 |                 |     |                                                                                                                                                                                                                                                                                                                                       |    |
| 27 |                 |     |                                                                                                                                                                                                                                                                                                                                       |    |
| 28 | Auditing        | 23  | Frequency and procedures for auditing trial conduct, if any, and whether the process will be independent from investigators and the sponsor                                                                                                                                                                                           | NA |
| 29 |                 |     |                                                                                                                                                                                                                                                                                                                                       |    |
| 30 |                 |     |                                                                                                                                                                                                                                                                                                                                       |    |
| 31 |                 |     |                                                                                                                                                                                                                                                                                                                                       |    |

### 32 **Ethics and dissemination**

|    |                          |    |                                                                                                                                                                                                                                  |                  |
|----|--------------------------|----|----------------------------------------------------------------------------------------------------------------------------------------------------------------------------------------------------------------------------------|------------------|
| 33 |                          |    |                                                                                                                                                                                                                                  |                  |
| 34 | Research ethics approval | 24 | Plans for seeking research ethics committee/institutional review board (REC/IRB) approval                                                                                                                                        | Pag 15, line 407 |
| 35 |                          |    |                                                                                                                                                                                                                                  |                  |
| 36 |                          |    |                                                                                                                                                                                                                                  |                  |
| 37 | Protocol amendments      | 25 | Plans for communicating important protocol modifications (eg, changes to eligibility criteria, outcomes, analyses) to relevant parties (eg, investigators, REC/IRBs, trial participants, trial registries, journals, regulators) | NA               |
| 38 |                          |    |                                                                                                                                                                                                                                  |                  |
| 39 |                          |    |                                                                                                                                                                                                                                  |                  |
| 40 |                          |    |                                                                                                                                                                                                                                  |                  |
| 41 |                          |    |                                                                                                                                                                                                                                  |                  |
| 42 |                          |    |                                                                                                                                                                                                                                  |                  |
| 43 |                          |    |                                                                                                                                                                                                                                  |                  |
| 44 |                          |    |                                                                                                                                                                                                                                  |                  |
| 45 |                          |    |                                                                                                                                                                                                                                  |                  |
| 46 |                          |    |                                                                                                                                                                                                                                  |                  |
| 47 |                          |    |                                                                                                                                                                                                                                  |                  |

|    |                               |     |                                                                                                                                                                                                                                                                                     |                  |
|----|-------------------------------|-----|-------------------------------------------------------------------------------------------------------------------------------------------------------------------------------------------------------------------------------------------------------------------------------------|------------------|
| 1  |                               |     |                                                                                                                                                                                                                                                                                     |                  |
| 2  |                               |     |                                                                                                                                                                                                                                                                                     |                  |
| 3  | Consent or assent             | 26a | Who will obtain informed consent or assent from potential trial participants or authorised surrogates, and how (see Item 32)                                                                                                                                                        | Pag 16, line 411 |
| 4  |                               |     |                                                                                                                                                                                                                                                                                     |                  |
| 5  |                               |     |                                                                                                                                                                                                                                                                                     |                  |
| 6  |                               | 26b | Additional consent provisions for collection and use of participant data and biological specimens in ancillary studies, if applicable                                                                                                                                               | NA               |
| 7  |                               |     |                                                                                                                                                                                                                                                                                     |                  |
| 8  | Confidentiality               | 27  | How personal information about potential and enrolled participants will be collected, shared, and maintained in order to protect confidentiality before, during, and after the trial                                                                                                | Pag 16, line 414 |
| 9  |                               |     |                                                                                                                                                                                                                                                                                     |                  |
| 10 |                               |     |                                                                                                                                                                                                                                                                                     |                  |
| 11 | Declaration of interests      | 28  | Financial and other competing interests for principal investigators for the overall trial and each study site                                                                                                                                                                       | Pag 22, line 665 |
| 12 |                               |     |                                                                                                                                                                                                                                                                                     |                  |
| 13 |                               |     |                                                                                                                                                                                                                                                                                     |                  |
| 14 | Access to data                | 29  | Statement of who will have access to the final trial dataset, and disclosure of contractual agreements that limit such access for investigators                                                                                                                                     | Pag 13, line 349 |
| 15 |                               |     |                                                                                                                                                                                                                                                                                     |                  |
| 16 |                               |     |                                                                                                                                                                                                                                                                                     |                  |
| 17 | Ancillary and post-trial care | 30  | Provisions, if any, for ancillary and post-trial care, and for compensation to those who suffer harm from trial participation                                                                                                                                                       | NA               |
| 18 |                               |     |                                                                                                                                                                                                                                                                                     |                  |
| 19 |                               |     |                                                                                                                                                                                                                                                                                     |                  |
| 20 | Dissemination policy          | 31a | Plans for investigators and sponsor to communicate trial results to participants, healthcare professionals, the public, and other relevant groups (eg, via publication, reporting in results databases, or other data sharing arrangements), including any publication restrictions | Pag 16, line 419 |
| 21 |                               |     |                                                                                                                                                                                                                                                                                     |                  |
| 22 |                               |     |                                                                                                                                                                                                                                                                                     |                  |
| 23 |                               |     |                                                                                                                                                                                                                                                                                     |                  |
| 24 |                               |     |                                                                                                                                                                                                                                                                                     |                  |
| 25 |                               | 31b | Authorship eligibility guidelines and any intended use of professional writers                                                                                                                                                                                                      | Pag 16, line 419 |
| 26 |                               |     |                                                                                                                                                                                                                                                                                     |                  |
| 27 |                               | 31c | Plans, if any, for granting public access to the full protocol, participant-level dataset, and statistical code                                                                                                                                                                     | Pag 16, line 426 |
| 28 |                               |     |                                                                                                                                                                                                                                                                                     |                  |
| 29 | <b>Appendices</b>             |     |                                                                                                                                                                                                                                                                                     |                  |
| 30 |                               |     |                                                                                                                                                                                                                                                                                     |                  |
| 31 | Informed consent materials    | 32  | Model consent form and other related documentation given to participants and authorised surrogates                                                                                                                                                                                  | NA               |
| 32 |                               |     |                                                                                                                                                                                                                                                                                     |                  |
| 33 |                               |     |                                                                                                                                                                                                                                                                                     |                  |
| 34 | Biological specimens          | 33  | Plans for collection, laboratory evaluation, and storage of biological specimens for genetic or molecular analysis in the current trial and for future use in ancillary studies, if applicable                                                                                      | NA               |
| 35 |                               |     |                                                                                                                                                                                                                                                                                     |                  |
| 36 |                               |     |                                                                                                                                                                                                                                                                                     |                  |

37 \*It is strongly recommended that this checklist be read in conjunction with the SPIRIT 2013 Explanation & Elaboration for important clarification on the items.  
 38 Amendments to the protocol should be tracked and dated. The SPIRIT checklist is copyrighted by the SPIRIT Group under the Creative Commons  
 39 "[Attribution-NonCommercial-NoDerivs 3.0 Unported](https://creativecommons.org/licenses/by-nc-nd/3.0/)" license.  
 40

41  
42  
43  
44  
45  
46  
47



# BMJ Open

## Vascular and cognitive effects of cocoa-rich chocolate in postmenopausal women: A study protocol for a randomized clinical trial

|                               |                                                                                                                                                                                                                                                                                                                                                                                                                                                                                                                                                                                                                                                                                                                                                                                                                                                                                                                                                                                                                                                                                                                                                                                                                                                                                                                                                                                                                                                                                                                                                                                                                                                                                                                                                                                                                                                                                                                                                                                                                                                                                                                                                                                                                                                                                      |
|-------------------------------|--------------------------------------------------------------------------------------------------------------------------------------------------------------------------------------------------------------------------------------------------------------------------------------------------------------------------------------------------------------------------------------------------------------------------------------------------------------------------------------------------------------------------------------------------------------------------------------------------------------------------------------------------------------------------------------------------------------------------------------------------------------------------------------------------------------------------------------------------------------------------------------------------------------------------------------------------------------------------------------------------------------------------------------------------------------------------------------------------------------------------------------------------------------------------------------------------------------------------------------------------------------------------------------------------------------------------------------------------------------------------------------------------------------------------------------------------------------------------------------------------------------------------------------------------------------------------------------------------------------------------------------------------------------------------------------------------------------------------------------------------------------------------------------------------------------------------------------------------------------------------------------------------------------------------------------------------------------------------------------------------------------------------------------------------------------------------------------------------------------------------------------------------------------------------------------------------------------------------------------------------------------------------------------|
| Journal:                      | <i>BMJ Open</i>                                                                                                                                                                                                                                                                                                                                                                                                                                                                                                                                                                                                                                                                                                                                                                                                                                                                                                                                                                                                                                                                                                                                                                                                                                                                                                                                                                                                                                                                                                                                                                                                                                                                                                                                                                                                                                                                                                                                                                                                                                                                                                                                                                                                                                                                      |
| Manuscript ID                 | bmjopen-2018-024095.R2                                                                                                                                                                                                                                                                                                                                                                                                                                                                                                                                                                                                                                                                                                                                                                                                                                                                                                                                                                                                                                                                                                                                                                                                                                                                                                                                                                                                                                                                                                                                                                                                                                                                                                                                                                                                                                                                                                                                                                                                                                                                                                                                                                                                                                                               |
| Article Type:                 | Protocol                                                                                                                                                                                                                                                                                                                                                                                                                                                                                                                                                                                                                                                                                                                                                                                                                                                                                                                                                                                                                                                                                                                                                                                                                                                                                                                                                                                                                                                                                                                                                                                                                                                                                                                                                                                                                                                                                                                                                                                                                                                                                                                                                                                                                                                                             |
| Date Submitted by the Author: | 03-Oct-2018                                                                                                                                                                                                                                                                                                                                                                                                                                                                                                                                                                                                                                                                                                                                                                                                                                                                                                                                                                                                                                                                                                                                                                                                                                                                                                                                                                                                                                                                                                                                                                                                                                                                                                                                                                                                                                                                                                                                                                                                                                                                                                                                                                                                                                                                          |
| Complete List of Authors:     | <p>Garcia-Yu, Irene; Institute of Biomedical Research of Salamanca (IBSAL), Primary Health Care Research Unit, La Alamedilla Health Center. Health Service of Castilla y León (SACyL); Consejería de Sanidad, Junta de Castilla y León, Public Health Information</p> <p>Garcia-Ortiz, Luis; Institute of Biomedical Research of Salamanca (IBSAL), Primary Health Care Research Unit, La Alamedilla Health Center. Health Service of Castilla y León (SACyL); University of Salamanca, Department of Biomedical and Diagnostic Sciences</p> <p>Gomez-Marcos, Manuel; Institute of Biomedical Research of Salamanca (IBSAL), Primary Health Care Research Unit, La Alamedilla Health Center. Health Service of Castilla y León (SACyL); University of Salamanca, Medicine</p> <p>Alonso-Dominguez, Rosario; Institute of Biomedical Research of Salamanca (IBSAL), Primary Health Care Research Unit, La Alamedilla Health Center. Health Service of Castilla y León (SACyL)</p> <p>González-Sánchez, J; Institute of Biomedical Research of Salamanca (IBSAL), Primary Health Care Research Unit, La Alamedilla Health Center. Health Service of Castilla y León (SACyL); University of Extremadura, Nursing</p> <p>Mora-Simon, Sara; Institute of Biomedical Research of Salamanca (IBSAL), Primary Health Care Research Unit, La Alamedilla Health Center. Health Service of Castilla y León (SACyL); University of Salamanca, Basic Psychology, Psychobiology and Behavioral Sciences Methodology</p> <p>González-Manzano, Susana; University of Salamanca, Analytical Chemistry</p> <p>Rodriguez-Sanchez, Emiliano; Institute of Biomedical Research of Salamanca (IBSAL), Primary Health Care Research Unit, La Alamedilla Health Center. Health Service of Castilla y León (SACyL); University of Salamanca, Medicine</p> <p>Maderuelo-Fernandez, Jose; Institute of Biomedical Research of Salamanca (IBSAL), Primary Health Care Research Unit, La Alamedilla Health Center. Health Service of Castilla y León (SACyL)</p> <p>Recio-Rodriguez, Jose; Institute of Biomedical Research of Salamanca (IBSAL), Primary Health Care Research Unit, La Alamedilla Health Center. Health Service of Castilla y León (SACyL); University of Burgos, Faculty of Health Sciences</p> |
| <b>Primary Subject            | Nutrition and metabolism                                                                                                                                                                                                                                                                                                                                                                                                                                                                                                                                                                                                                                                                                                                                                                                                                                                                                                                                                                                                                                                                                                                                                                                                                                                                                                                                                                                                                                                                                                                                                                                                                                                                                                                                                                                                                                                                                                                                                                                                                                                                                                                                                                                                                                                             |

1  
2  
3  
4  
5  
6  
7  
8  
9  
10  
11  
12  
13  
14  
15  
16  
17  
18  
19  
20  
21  
22  
23  
24  
25  
26  
27  
28  
29  
30  
31  
32  
33  
34  
35  
36  
37  
38  
39  
40  
41  
42  
43  
44  
45  
46  
47  
48  
49  
50  
51  
52  
53  
54  
55  
56  
57  
58  
59  
60

|                            |                                                                                                    |
|----------------------------|----------------------------------------------------------------------------------------------------|
| Heading</b>:               |                                                                                                    |
| Secondary Subject Heading: | Cardiovascular medicine                                                                            |
| Keywords:                  | chocolate, postmenopause, arterial pressure, vascular stiffness, body composition, quality of life |
|                            |                                                                                                    |

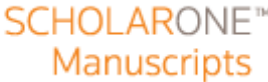

1  
2  
3  
4  
5  
6  
7  
8  
9  
10  
11  
12  
13  
14  
15  
16  
17  
18  
19  
20  
21  
22  
23  
24  
25  
26  
27  
28  
29  
30  
31  
32  
33  
34  
35  
36  
37  
38  
39  
40  
41  
42  
43  
44  
45  
46  
47  
48  
49  
50  
51  
52  
53  
54  
55  
56  
57  
58  
59  
60

1 **TITLE: Vascular and cognitive effects of cocoa-rich chocolate in**  
2 **postmenopausal women: A study protocol for a randomized clinical trial.**

3 **AUTHORS:**

4 Irene A Garcia-Yu<sup>1,2</sup>, Luis Garcia-Ortiz<sup>1,3</sup>, Manuel A Gómez-Marcos<sup>1,4</sup>, Rosario Alonso-  
5 Dominguez<sup>1</sup>, Jesus Gonzalez-Sanchez<sup>1,5</sup>, Sara Mora-Simon<sup>1,6</sup>, Susana González-  
6 Manzano<sup>7</sup>, Emiliano Rodriguez-Sanchez<sup>1,4</sup>, Jose A Maderuelo-Fernandez<sup>1\*</sup>, Jose I  
7 Recio-Rodriguez<sup>1,8\*</sup>

8 1. Institute of Biomedical Research of Salamanca (IBSAL), Primary Health Care  
9 Research Unit, La Alamedilla Health Center. Health Service of Castilla y León  
10 (SACyL), Salamanca, Spain.

11 2. Public Health Information Service, Consejería de Sanidad, Junta de Castilla y León,  
12 Valladolid, Spain.

13 3. Department of Biomedical and Diagnostic Sciences, University of Salamanca,  
14 Salamanca, Spain.

15 4. Department of Medicine, University of Salamanca, Salamanca, Spain.

16 5. Department of Nursing, University of Extremadura, Plasencia, Spain.

17 6. Department of Basic Psychology, Psychobiology and Behavioral Sciences  
18 Methodology, University of Salamanca, Salamanca, Spain.

19 7. Department of Analytical Chemistry, University of Salamanca, Salamanca, Spain.

20 8. Faculty of Health Sciences, University of Burgos, Burgos, Spain.

21 \*These authors contributed equally to this work.

22 **CORRESPONDING AUTHOR:**

23 Irene A Garcia-Yu

24 Primary Care Research Unit, The Alamedilla Health Centre. 37003 Salamanca, Spain.

25 ireneailinggarciayu@gmail.com

26 0034923231859

1  
2  
3 27 **ABSTRACT**

4 28 **Introduction:** The intake of polyphenols has certain health benefits. This study will aim  
5  
6 29 to assess the effect of adding a daily amount of chocolate high in cocoa content and  
7  
8 30 polyphenols to the normal diet on blood pressure, vascular function, cognitive  
9  
10 31 performance, quality of life and body composition in postmenopausal women.

11  
12 32 **Methods and analysis:** Here we plan a randomized clinical trial with two parallel  
13  
14 33 groups involving a total of 140 women between 50- and 64-years-old in the  
15  
16 34 postmenopausal period, defined by amenorrhea of at least 12 consecutive months. The  
17  
18 35 main variable will be the change in blood pressure. Secondary variables will be  
19  
20 36 changes in vascular function, quality of life, cognitive performance, and body  
21  
22 37 composition. The intervention group will be given chocolate containing 99% cocoa, with  
23  
24 38 instructions to add 10 g daily to their normal diet for 6 months. The daily nutritional  
25  
26 39 contribution of this amount of chocolate is 59 Kcal and 65.4 mg of polyphenols. There  
27  
28 40 will be no intervention in the control group. All variables will be measured at the  
29  
30 41 baseline visit and 3 and 6 months after randomization, except cognitive performance  
31  
32 42 and quality of life, which will only be assessed at baseline and at 6 months.  
33  
34 43 Recruitment is scheduled to begin on June 1, 2018, and the study will continue until  
35  
36 44 May 31, 2019.

37  
38 45 **Ethics and dissemination:** This study was approved by the Clinical Research Ethics  
39  
40 46 Committee of the Health Area of Salamanca, Spain ("CREC of Health Area of  
41  
42 47 Salamanca") in February 2018. A SPIRIT checklist is available for this protocol. The  
43  
44 48 clinical trial has been registered at ClinicalTrials.gov provided by the US National  
45  
46 49 Library of Medicine, number NCT03492983. The results will be disseminated through  
47  
48 50 open access peer-reviewed journals, conference presentations, broadcast media, and  
49  
50 51 a presentation to stakeholders.

51  
52 52 **Keywords:** Chocolate, postmenopause, arterial pressure, vascular stiffness, body  
53  
54 53 composition, quality of life.

54  
55  
56 54

55

For peer review only

1  
2  
3  
4  
5  
6  
7  
8  
9  
10  
11  
12  
13  
14  
15  
16  
17  
18  
19  
20  
21  
22  
23  
24  
25  
26  
27  
28  
29  
30  
31  
32  
33  
34  
35  
36  
37  
38  
39  
40  
41  
42  
43  
44  
45  
46  
47  
48  
49  
50  
51  
52  
53  
54  
55  
56  
57  
58  
59  
60

1  
2  
3 56 **Strengths and limitations of this study:**

- 4  
5 57 - This study will use commercially available chocolate with a high content of cocoa  
6  
7 58 and polyphenols during the intervention.  
8  
9 59 - Blood pressure and vascular function will be measured objectively using a  
10  
11 60 sphygmomanometer and a Vasera VS-2000 device (Fukuda Denshi), with body  
12  
13 61 composition measured by impedance analysis, while the quality of life and cognitive  
14  
15 62 performance will be assessed using validated instruments.  
16  
17 63 - Due to the nature of the intervention, the participants cannot be blinded, although  
18  
19 64 the researchers who perform the measurements and the statistical analysis will be  
20  
21 65 blinded.  
22  
23 66

24  
25 67 **INTRODUCTION**

26  
27 68 Polyphenols are bioactive compounds found in many plants, fruits and vegetables. The  
28  
29 69 beneficial effects on human health associated with the consumption of a diet rich in  
30  
31 70 polyphenols has generated great scientific interest in these substances.[1-3] The action  
32  
33 71 of polyphenols is based on their antioxidant capacity through the uptake of free  
34  
35 72 radicals, the chelation of metals with redox properties and the modulation and inhibition  
36  
37 73 of enzymatic activities.[4]  
38  
39 74

40  
41 75 The most abundant polyphenols in cocoa are flavonoids, which have been linked to a  
42  
43 76 protective effect against cardiovascular disease, decreasing the risk of cardiovascular  
44  
45 77 morbidity and mortality and favouring the prevention of other chronic diseases, such as  
46  
47 78 diabetes mellitus type 2.[1-3, 5-7] The ability to reduce cardiovascular risk could be due  
48  
49 79 to an improvement in the elements that define metabolic syndrome, the improvement of  
50  
51 80 vascular endothelial dysfunction, insulin resistance and the inhibition of platelet  
52  
53 81 activation and aggregation.[8, 9] However, although current evidence suggests that  
54  
55 82 polyphenols produce an improvement in cardiovascular health, this is insufficient to  
56  
57 83 determine the minimum amount of intake necessary to achieve health benefits.[10]

1  
2  
3 844  
5 **85 Cocoa polyphenols and blood pressure:**

6  
7 86 The effect of consuming polyphenols present in chocolate on the blood pressure  
8  
9 87 statistics of healthy individuals is unclear. Cocoa consumption has been associated  
10  
11 88 with an improvement in endothelial function and a decrease in blood pressure in both  
12  
13 89 healthy subjects and those with risk factors and cardiovascular diseases.[11, 12] Some  
14  
15 90 studies have observed a dose-dependent relationship between cocoa intake and  
16  
17 91 clinical BP, with higher consumption equated to lower blood pressure and better  
18  
19 92 vascular function.[13, 14] Conversely, other research has not obtained significant  
20  
21 93 changes in these parameters related to the supplementation of cocoa or pure  
22  
23 94 polyphenols, such as epicatechin or quercetin.[15, 16]

24  
25 95

26  
27 96 Endothelial dysfunction in postmenopausal women causes changes that favour the  
28  
29 97 development of cardiovascular risk factors and atherosclerosis, which lead to the  
30  
31 98 appearance and maintenance of hypertension.[17, 18] A decrease in blood pressure  
32  
33 99 has been observed in this group after daily consumption of cocoa with a flavanol  
34  
35 100 content of 40.12 mg. Below this level, however, no changes have been observed.[19]

36  
37 10138  
39 102 **Cocoa polyphenols and vascular function:**

40  
41 103 Among healthy individuals, as well as postmenopausal women, the consumption of  
42  
43 104 polyphenols present in cocoa has been associated with a dose-dependent  
44  
45 105 improvement of vascular function, in particular of arterial stiffness measured by pulse  
46  
47 106 wave speed.[13, 14, 19] One of these studies also suggests that the reduction in  
48  
49 107 arterial stiffness observed in postmenopausal women after consumption of cocoa is  
50  
51 108 independent of the frequency of the intake.[19] However, this relationship is not evident  
52  
53 109 in people with mild hypertension when cardio-ankle vascular index (CAVI) is used as a  
54  
55 110 measure of arterial stiffness.[20]

56  
57 111

1  
2  
3 112 There is also evidence of the influence of these polyphenols in reducing the  
4  
5 113 augmentation index (Aix). The study by West et al.,[21] involving subjects with excess  
6  
7 114 weight and moderate obesity, concludes that treatment with dark chocolate decreases  
8  
9 115 Aix in women, although it seems that this association might have a greater effect on  
10  
11 116 the elasticity of the large arteries, especially in subjects with obesity and diabetes  
12  
13 117 mellitus type 2.[22]

14  
15 118

### 119 **Cocoa polyphenols and cognitive performance:**

18  
19 120 There is evidence to suggest that chocolate rich in polyphenols is beneficial for  
20  
21 121 cognitive performance and state since it improves mental processing speed and  
22  
23 122 attenuates the increase of mental fatigue among healthy young adults.[23, 24] An  
24  
25 123 improvement in cognitive performance among older age groups after eating chocolate  
26  
27 124 has also been observed,[25] especially in subjects with higher risk of cardiovascular  
28  
29 125 disease.[26] Several studies also show that polyphenol-rich chocolate causes an  
30  
31 126 improvement in executive function, categorical fluency,[27] and working memory,[28,  
32  
33 127 29] and a slowing of mental fatigue.[30] Also, a higher frequency of chocolate  
34  
35 128 consumption has been associated with improved cognitive function.[29] Furthermore, a  
36  
37 129 positive influence of cocoa polyphenols on physiological processes has been reported,  
38  
39 130 with a neuroprotective effect[31] and improved cognitive performance.[32] In this  
40  
41 131 regard, it has been suggested that the brain-derived neurotrophic factor (BDNF) plays  
42  
43 132 a role in the cognitive enhancement induced by the flavonoides.[33] Favourable effects  
44  
45 133 on cerebrovascular function have also been observed in postmenopausal women after  
46  
47 134 consumption of chocolate with a high concentration of cocoa.[34]

48  
49 135

### 136 **Cocoa polyphenols and quality of life:**

52  
53 137 The quality of life linked to health is represented by the individual's perception of well-  
54  
55 138 being in various aspects of life, including physical and mental aspects. The effect of  
56  
57 139 chocolate and polyphenols on the quality of life has scarcely been studied, with little



1  
2  
3 140 available evidence and even less of a conclusive nature. In a study conducted among  
4  
5 141 healthy people, where regular consumption of chocolate was recorded over 1 year, no  
6  
7 142 evidence was found of a clear association between chocolate intake and the physical  
8  
9 143 or mental components of quality of life.[35] Nevertheless, it has been observed that the  
10  
11 144 consumption of dark chocolate might be beneficial for the quality of life of women with  
12  
13 145 fibromyalgia.[36]

14  
15 146

### 147 **Cocoa polyphenols and body composition:**

148 The menopause period leads to various changes in the body composition of  
19  
20 149 women.[37] Regarding the connection between cocoa polyphenols and body  
21  
22 150 composition, results diverge. Some clinical trials involving healthy people and  
23  
24 151 overweight or obese patients have not reported significant differences that link  
25  
26 152 chocolate consumption to anthropometric measures.[16, 20, 21, 38] Other studies  
27  
28 153 indicate that chocolate consumption might have positive effects on body composition in  
29  
30 154 adolescents,[39] patients with diabetes[40] or women with obesity.[41] Two recent  
31  
32 155 systematic reviews also indicate that eating chocolate is associated with reduced body  
33  
34 156 mass index (BMI) and waist circumference,[42, 43] and one of them also concludes  
35  
36 157 that the amount and the length of time during which it is eaten play a key role in these  
37  
38 158 beneficial effects.[43] Conversely, other studies such as that carried out with the cohort  
39  
40 159 of the Atherosclerosis Risk in Communities (ARIC) study have observed a dose-  
41  
42 160 dependent increase in weight after habitual chocolate consumption.[44]

43  
44  
45 161

46 162 In sum, the polyphenols present in chocolate seem to have a positive effect on BP,  
47  
48 163 vascular function, cognitive performance, and quality of life, especially in populations  
49  
50 164 with increased cardiovascular risk, such as postmenopausal women.[45] However, the  
51  
52 165 conflicting results obtained in different studies suggest that the real contribution of  
53  
54 166 these compounds to health and the underlying mechanisms remain unclear. Moreover,

1  
2  
3 167 most of these studies have used preparations with high concentrations of polyphenols  
4  
5 168 that are usually not present in the normal diet.

6  
7 169

8  
9 170 This study aims to evaluate the effect of adding a daily amount of 10 g of chocolate  
10  
11 171 high in cocoa content (99%) and polyphenols to the normal diet on blood pressure,  
12  
13 172 vascular function, cognitive performance, quality of life, and body composition in  
14  
15 173 postmenopausal women.

16  
17 174

## 18 175 **METHODS AND ANALYSIS**

### 19 176 **Design and setting:**

20  
21  
22 177 This controlled and randomized clinical trial involves two parallel groups. The study will  
23  
24 178 be carried out in the Research Unit of the La Alamedilla Health Centre in Salamanca  
25  
26 179 (Spain), which is part of the Biomedical Research Institute of Salamanca (IBSAL) and  
27  
28 180 the Primary Care Prevention and Health Promotion Research Network (REDIAPP).  
29  
30 181 The recruitment schedule is set to start on June 1, 2018, and the study will run until  
31  
32 182 May 31, 2019. There will be a baseline assessment and two follow-ups, at 3 and 6  
33  
34 183 months.

35  
36 184

### 37 185 **Study population:**

38  
39  
40 186 Those subjects who meet the selection criteria and sign the informed consent after  
41  
42 187 receiving information about the objectives and implementation of the study will take  
43  
44 188 part.

45  
46 189

47  
48 190 Inclusion criteria: women between 50- and 64-years-old in postmenopause, defined by  
49  
50 191 and checked against amenorrhea during at least 12 consecutive months.

51  
52 192 Exclusion criteria: a personal history of cardiovascular disease; personal history of  
53  
54 193 diabetes mellitus, arterial hypertension or dyslipidemia under pharmacological  
55  
56 194 treatment; hypocaloric diets; clinically demonstrable neurological and/or

1  
2  
3 195 neuropsychological disease; treatment with hormone replacement therapy; intolerance  
4  
5 196 and/or allergy to cocoa or any of the components of the supplement.  
6  
7 197

8  
9 198 Participants will be selected using a consecutive sample of women who meet the  
10  
11 199 selection criteria in the GP surgeries of four urban primary care centres in Salamanca,  
12  
13 200 from June 1, 2018.  
14  
15 201

#### 16 202 **Patient and public involvement:**

17  
18 203 Patients and the public were not involved in the design of this study or outcome  
19  
20 204 measures. We hope that the results of the study will be disseminated through press  
21  
22 205 releases and information-sharing meetings with the study participants.  
23  
24 206

#### 25 207 **Sample size:**

26  
27  
28 208 The size of the sample has been estimated based on the potential modification of the  
29  
30 209 main variable, systolic blood pressure (SBP). Given alpha and beta risks of 0.05 and  
31  
32 210 0.20 respectively in bilateral contrast and a standard deviation (SD) of 5.8 mmHg, 140  
33  
34 211 participants (70 per group) will be necessary to detect a minimum difference of 2.9  
35  
36 212 mmHg in the SBP between the two groups. A predicted drop-out rate of 10% during  
37  
38 213 follow-up has been taken into account. This estimate has considered the results  
39  
40 214 obtained in a similar study in which a decrease in SBP of 6.5 was observed  $\pm$  5.8  
41  
42 215 mmHg.[14]  
43  
44 216

#### 45 217 **Randomization:**

46  
47  
48 218 Participants will be assigned to the intervention group (IG) or control group (CG) at  
49  
50 219 random. The allocation sequence will be generated by an independent researcher  
51  
52 220 using the Epidat 4.2 program [46] before the inclusion of the first participant, using  
53  
54 221 masked block randomisation. Patients will receive their randomisation number based  
55  
56 222 on the order of their baseline evaluation visit and will remain hidden until the  
57  
58  
59  
60

1  
2  
3 223 participants are assigned to each group. To ensure that the blinding is maintained,  
4 224 patients will be given clear instructions not to disclose which treatment they have been  
5  
6 225 randomised to while being interviewed by the blind assessors. Information on treatment  
7  
8 226 allocation will be stored in a secure locker in case of emergency unblinding.  
9

10  
11 227

12  
13 228 **Intervention:**

14 229 No type of intervention will be carried out with the CG participants.  
15

16 230

17  
18 231 IG participants will be given chocolate with 99% cocoa content and asked to eat 10 g  
19  
20 232 daily for 6 months. According to the EFSA (European Food Safety Authority), 10 g of  
21  
22 233 high-flavanol dark chocolate consumed in the context of a balanced diet could help  
23  
24 234 maintain endothelium-dependent vasodilation.[47] Participants will also be given  
25  
26 235 instructions on eating and keeping the product, with the recommendations, for  
27  
28 236 example, that the chocolate can be consumed in small pieces leaving them unmated in  
29  
30 237 the mouth, without chewing them. Also, a series of recommendations will be given  
31  
32 238 addressing the organoleptic characteristics of the product, as well as the  
33  
34 239 recommendations of trying to consume the product at the same time or refrain from  
35  
36 240 ingesting it dissolved in milk. Also, participants will be given a calendar on which to  
37  
38 241 record the time it was eaten each day. This calendar will be returned to the researchers  
39  
40 242 at each replenishment visit.  
41

42 243

43  
44 244 This amount of chocolate provides the following daily nutritional contribution: 59 Kcal,  
45  
46 245 0.8 g of carbohydrates, 1.5 g of protein, 5.1 g of fat, of which 3.1 g are saturated fats.  
47  
48 246 The proportion of polyphenols per 10 g is 65.4 mg. The polyphenolic profile of this  
49  
50 247 compound can be seen in Table 1. On each visit, IG participants will receive the  
51  
52 248 amount of chocolate they need until the next replenishment visit. In addition to the  
53  
54 249 baseline visit, there will be five replenishment visits in months 1, 2, 3 (coinciding with  
55  
56 250 the evaluation visit), 4 and 5. The sole purpose of the replenishment visits will be to

1  
2  
3 251 supply the amount of chocolate needed until the next visit, without any other  
4  
5 252 intervention being carried out.

6  
7 253

8  
9 254 Participants in both groups will be instructed to continue with the dietary pattern they  
10  
11 255 usually follow, without changing their eating habits during the study period.

12  
13 256

14  
15 257 **Procedures:**

16  
17 258 For each participant a baseline visit and two follow-up visits at 3 and 6 months after the  
18  
19 259 initial one are scheduled (Figure 1). The IG will also make five replenishment visits, in  
20  
21 260 months 1, 2, 3 (coinciding with the first follow-up visit), 4 and 5. In the replenishment  
22  
23 261 visits, participants will be given the amount of chocolate needed until the next visit and  
24  
25 262 will hand in the calendar with the record of the chocolate eaten.

26  
27 263

28  
29 264 **Primary and secondary endpoints:**

30  
31 265 The primary variable will be the decrease in clinical BP, measured with a digital  
32  
33 266 sphygmomanometer. Secondary variables will include vascular function, quality of life,  
34  
35 267 cognitive performance and body composition.

36  
37 268

38  
39 269 All variables will be measured at 3 and 6 months after randomization, except for  
40  
41 270 cognitive performance and quality of life, which will be assessed only after 6 months.

42  
43 271

44  
45 272 **Blood pressure:**

46  
47 273 Clinical systolic and diastolic blood pressure will be measured with a validated Omron  
48  
49 274 M10-IT sphygmomanometer (Omron Healthcare, Kyoto, Japan). Three measurements  
50  
51 275 will be taken in the dominant arm of the subject in a sitting position after at least 5 min  
52  
53 276 of rest with an appropriately sized cuff, following the recommendations of the European  
54  
55 277 Society of Hypertension.[48] The average of the last two measurements will be  
56  
57 278 recorded.

279

**280 Vascular function:**

281 The Vasera VS-2000 device (Fukuda Denshi) will be used to measure the CAVI and  
282 the brachial-ankle pulse wave velocity (ba-PWV) at rest. CAVI is a good indicator of  
283 arterial stiffness, providing an accurate estimate of the degree of atherosclerosis  
284 without depending on blood pressure.[49] CAVI  $\geq 9$  and ba-PWV  $\geq 18.3$  will be  
285 considered pathological.[50] Pathological CAVI is representative of subclinical  
286 atherosclerosis.[51]

287

**288 Cognitive performance:**

289 The instructions are presented visually at the start of the baseline measurement to  
290 ensure limiting a learning effect over the subsequent testing periods. Attention and  
291 executive functions: Trail Making Test A will be used to measure attention and Trail  
292 Making Test B for processing speed and executive functions.[52]

293

294 Immediate verbal memory will be assessed with the Rey Auditory Verbal Learning  
295 Test. The immediate recall of a list of 15 words is measured in three attempts, followed  
296 by delayed verbal memory through the free recall of the words learned in the first part  
297 of the test after 10 min.[53]

298

299 Working memory will be assessed with the WAIS Digit Span Backward test.[54]

300 Phonological fluency will be explored by naming as many words as possible starting  
301 with different letters of the FAS Questionnaire in the space of 1 min.[55]

302

303 Categorical fluency measures verbal semantic fluency and will be assessed by naming  
304 as many animals as possible in 1 min.[56]

305

**306 Quality of life:**

1  
2  
3 307 The quality of life linked to health will be assessed through the EuroQol 5-D  
4  
5 308 questionnaire (EQ-5D). We will use the adapted Spanish version of this questionnaire,  
6  
7 309 which has been validated in the Spanish population.[57] This questionnaire consists of  
8  
9 310 three elements: the assessment by the individuals of their state of health in level of  
10  
11 311 severity by dimension (mobility, personal care, daily activities, pain/discomfort and  
12  
13 312 anxiety/depression), the assessment of their state of health on an analogue visual  
14  
15 313 scale, and finally an index of social values obtained for each state of health generated  
16  
17 314 by the instrument.

18  
19 315

20 316 The quality of life will also be studied using the Cervantes Scale.[58] This questionnaire  
21  
22 317 is specifically designed for menopause and postmenopause and has been validated for  
23  
24 318 Spanish women. Its 31 structured items cover the four dimensions of menopause:  
25  
26 319 menopause and health, sexuality, psychic domain and relationships.

27  
28  
29 320

### 30 321 **Body composition:**

31  
32 322 Body composition will be measured with the Inbody 230 Monitor.[59] This analyzer  
33  
34 323 provides data on fat mass and body fat percentage as principal outcomes and also  
35  
36 324 skeletal muscle mass, total body water, fat-free mass, waist-hip ratio, basal  
37  
38 325 metabolism, and a segmental analysis.

39  
40  
41 326

42 327 Body weight will be measured twice with an electronic scale (Scale 7830, Soehnle  
43  
44 328 Professional GmbH & Co, Backnang, Germany) after proper calibration (accuracy  $\pm 0.1$   
45  
46 329 kg). Height will be measured by recording the average of two readings rounded to the  
47  
48 330 nearest centimetre using a stadiometer (Seca 222, Medical scale and measurement  
49  
50 331 system, Birmingham, UK). Both measurements will be made with the subject barefoot  
51  
52 332 and wearing light clothing. Body mass index will be calculated by dividing weight (kg)  
53  
54 333 by height squared ( $m^2$ ). Waist circumference will be assessed in accordance with the  
55  
56 334 recommendations of the Spanish Society for the Study of Obesity (SEEDO)[60] and will

1  
2  
3 335 be measured in duplicate before and after inhalation, using a flexible tape parallel to  
4  
5 336 the floor, at the level of the mid-point between the lowest rib and the iliac crest, with the  
6  
7 337 subject standing up and without clothes.  
8

9 338

### 10 339 **Other variables**

11  
12 340 Clinical and sociodemographic variables

13  
14 341 At the baseline visit, information on clinical and sociodemographic variables will also be  
15  
16 342 collected via questions about age, marital status, educational level and occupation. The  
17  
18 343 family history of cardiovascular disease and personal history of anxiety and depression,  
19  
20 344 gestational diabetes, hypertension, dyslipidemia and the prescribed pharmacological  
21  
22 345 treatment (antiaggregants, anticoagulants, thyroid hormone treatment, anxiolytics) will  
23  
24 346 also be recorded, as well as the taking of NSAIDs in the last 2 weeks.  
25

26 347

27  
28 348 In subsequent visits, personal histories of cardiovascular disease, diabetes mellitus,  
29  
30 349 arterial hypertension or dyslipidemia in treatment, as well as the prescribed  
31  
32 350 pharmacological treatment (hypolipidemic, antihypertensive, antidiabetic) will also be  
33  
34 351 noted.  
35

36 352

37  
38 353 Evaluation of chocolate consumption and habitual diet

39  
40 354 Chocolate consumption will be assessed at each evaluation visit by a series of  
41  
42 355 questions about the amount, type and frequency of consumption in the period between  
43  
44 356 visits.  
45

46 357

47  
48 358 Nutritional habits will be assessed by a 24-h log on three non-consecutive days prior to  
49  
50 359 each visit.  
51

52 360

53  
54 361 Evaluation of other lifestyles  
55  
56  
57  
58  
59  
60



1  
2  
3 362 The use of tobacco will be assessed with a questionnaire on the personal history and  
4  
5 363 pattern of smoking.

6  
7 364  
8  
9 365 Alcohol use will be recorded with a questionnaire covering the previous 7 days, which  
10  
11 366 will include specific beverages and the amount by volume drunk of each.

12  
13 367  
14  
15 368 Physical activity will be measured using the International Physical Activity  
16  
17 369 Questionnaire (IPAQ) in its short version and validated in Spanish.[61] This  
18  
19 370 questionnaire measures activity over the previous 7 days, classifying the subjects  
20  
21 371 according to three activity levels (low, moderate and high) with respect to three types of  
22  
23 372 activities: walking, moderate-intensity activities and vigorous-intensity activities. The  
24  
25 373 amount of physical exercise will be estimated in METs-minute/week.

26  
27 374  
28  
29 375 Evaluation of laboratory variables

30  
31 376 At baseline and follow-up visits at 6 months, we will measure plasma fasting glucose  
32  
33 377 values (mg/dL), glycated haemoglobin (%), total cholesterol (mg/dL), total triglycerides  
34  
35 378 (mg/dL), HDL cholesterol (mg/dL), LDL cholesterol (mg/dL), creatinine (mg/L), and  
36  
37 379 insulinemia (mg/dL). Creatinine in urine (mg/dL) and microalbuminuria (mg/dL) will also  
38  
39 380 be measured. Insulin resistance will be determined using the HOMA index  
40  
41 381 (Homeostasis Model Assessment Insulin Resistance) estimated using the following  
42  
43 382 equation: Fasting glucose (mmol/l) × insulin (mU/ml)/22.5.

44  
45 383  
46  
47 384 The evaluation visits will be made in the morning between 8:00 and 10:00 a.m. Each  
48  
49 385 participant will be informed prior to the visit to fast for at least 12 h, having avoided  
50  
51 386 during the 24 h prior to visiting the consumption of polyphenol-rich foods, including  
52  
53 387 cocoa, chocolate, apples, and red wine as well as alcoholic drinks or the performance  
54  
55 388 of the programmed physical activity. All evaluation visits, including blood pressure  
56  
57 389 measurements and evaluations of vascular function, will be carried out in a room with

1  
2  
3 390 standardized lighting and temperature, recommending that patients attend the  
4  
5 391 appointment with a prior rest of at least 8–10 h.

6  
7 392

8  
9 393 Data collection procedure, data management and monitoring

10  
11 394 Data collection of the baseline and follow-up evaluation visits at 3 and 6 months will be  
12  
13 395 carried out by a nurse specifically trained to do so. The intervention visit after the  
14  
15 396 baseline evaluation will be carried out by another nurse, different from the one who  
16  
17 397 performs the data collection. Each participant will have a unique identification code  
18  
19 398 within the study. All measurements will be compiled in a data collection notebook and  
20  
21 399 kept in a secure place that will remain closed within the health centre. A database will  
22  
23 400 be created in SPSS to which only the members of the research team and the people  
24  
25 401 related to the statistical analyses will have access. The principal investigator or a  
26  
27 402 person designated for this purpose will perform a weekly process of monitoring the  
28  
29 403 study, taking into account the inclusion of patients, cleaning and debugging of  
30  
31 404 databases, and adaptation of the procedures to the protocol.

32  
33 405

34  
35 406 **Blinding strategy:**

36  
37 407 Due to the nature of the intervention itself, the participants and the person responsible  
38  
39 408 for delivering the chocolate to IG participants cannot be blinded. However, the person  
40  
41 409 responsible for carrying out the study measurements at each visit and for the statistical  
42  
43 410 analysis will be blind to the intervention.

44  
45 411

46  
47 412 **Statistical analysis:**

48  
49 413 General analysis

50  
51 414 Results for the quantitative variables will be expressed by mean  $\pm$  standard deviation or  
52  
53 415 by frequency distribution in the case of qualitative variables. The normality of the  
54  
55 416 variables will be assessed using the Kolmogorov-Smirnov test. In cases where a  
56  
57 417 normal distribution cannot be assumed, the corresponding nonparametric tests will be

1  
2  
3 418 applied. The association between independent qualitative variables will be analyzed  
4  
5 419 using the Chi-square test or Fisher's exact test. The means between the two groups  
6  
7 420 will be compared using the Student's t-test or the Mann-Whitney U test, and the  
8  
9 421 Pearson or Spearman correlation coefficients will be calculated to analyze the  
10  
11 422 relationship between quantitative variables.

12  
13 423

14 424 The analysis of the results for the main variable and the secondary variables will be  
15  
16 425 carried out by intention to treat. Also, a secondary analysis will be made, taking into  
17  
18 426 account chocolate intake adherence (< 50% days and > 50% days) and other relevant  
19  
20 427 subgroups in relation to their physical activity or previous chocolate consumption.

21  
22 428 All analyses will be performed using SPSS version 23.0 (IBM Corporation, Armonk,  
23  
24 429 NY, USA) and an alpha risk of 0.05 will be set as the limit of statistical significance.

25  
26 430

27  
28 431 Analysis of the intervention's effect on primary and secondary outcomes

29  
30 432 To analyze the changes at 3 and 6 months from baseline in the primary outcome  
31  
32 433 (blood pressure) and in the secondary outcomes within the same group, the Student's  
33  
34 434 t-test for paired data or the Wilcoxon test will be used. The McNemar test will be  
35  
36 435 applied with quantitative or dichotomous variables.

37  
38 436

39  
40 437 Effects of the intervention will be analyzed in a comparison of the changes in blood  
41  
42 438 pressure and the secondary variables between the IG and the CG, using ANCOVA and  
43  
44 439 adjusting for possible confounders e.g. smoking status. Effects of the intervention  
45  
46 440 during follow-up will be studied with an analysis of the variance of repeated measures.

47  
48 441

49  
50 442 Analysis by subgroups

51  
52 443 The effect of the intervention could be influenced by age, sociocultural level and  
53  
54 444 adherence to the study's chocolate intake. The same analyses described above will be  
55  
56 445 performed for each of the subgroups above.

446

447 Secondary analyses

448 A multivariate multiple regression analysis will be performed to identify the variables  
449 with the greatest influence on blood pressure changes and the secondary variables  
450 analyzed.

451

**452 Methodological limitations:**

453 Due to the nature of the intervention, the participating subjects cannot be blinded.  
454 However, the researcher who analyses the data and the person who makes the  
455 measurements during follow-up visits will be blinded with respect to the group to which  
456 the participants belong. The smoking status in the 12 months prior to the time of  
457 inclusion could influence the outcome measures related to vascular function and blood  
458 pressure; therefore, although these participants will not be excluded, this aspect will be  
459 controlled in the statistical analysis. Assessment of the quality of life and lifestyles will  
460 be carried out through self-reported data; however, previously validated instruments  
461 will be used to obtain these. To make compliance with the intervention in the IG easier,  
462 IG participants will be provided with instructions on eating the chocolate and a calendar  
463 to record each intake.

464

**465 ETHICS AND DISSEMINATION****466 Ethical considerations:**

467 The study was approved by the Clinical Research Ethics Committee of the Salamanca  
468 Health Area ("CREC of Health Area of Salamanca") in February 2018. A SPIRIT  
469 checklist is available for this protocol. The clinical trial has been registered at  
470 ClinicalTrials.gov with the identifier NCT03492983.

471

472 Participants must provide informed consent in accordance with the Declaration of  
473 Helsinki. Subjects will be informed of the objectives of the project and the risks and

1  
2  
3 474 benefits of the explorations to be carried out, including sample collection. None of the  
4  
5 475 tests will pose risks that could endanger the lives of participants. Confidentiality of  
6  
7 476 participant data will be guaranteed at all times in accordance with the provisions of the  
8  
9 477 Organic Law on the Protection of Personal Data (15/1999 of December 13, LOPD), and  
10  
11 478 under the conditions established by Law 14/2007 of biomedical research.

12  
13 479

#### 14 480 **Dissemination plan:**

15  
16 481 The research group plans to achieve rapid and widespread dissemination of results to  
17  
18 482 ensure maximum visibility of this study. To this end, the results of the study will be  
19  
20 483 published in open-access scientific journals with peer review. At least one publication  
21  
22 484 of the main results and others with the secondary results are planned. This will be  
23  
24 485 complemented by the presentation of the results of the study at relevant scientific  
25  
26 486 conferences and seminars of national and international scope. Also, a doctoral thesis  
27  
28 487 based on this project will be prepared. Appropriate dissemination will likewise be  
29  
30 488 carried out through social networks and other media. Moreover, given the involvement  
31  
32 489 of a commercial product, the transfer to clinical practice is expected to be rapid if the  
33  
34 490 results are as expected.

35  
36 491

#### 37 38 492 **DISCUSSION**

39  
40 493 In recent years, there has been an increase in attention to polyphenols and their  
41  
42 494 beneficial effects on health, with numerous studies being carried out to assess this.[19,  
43  
44 495 21] Similarly, the therapeutic use of these compounds has been suggested for certain  
45  
46 496 diseases or population groups.[36, 62] The menopause increases the risk of  
47  
48 497 developing cardiovascular disease compared to the previous period.[45] However, we  
49  
50 498 have not found any study that assesses the effect of adding commercially available  
51  
52 499 chocolate high in cocoa content to the usual diet in this population. Similarly, no studies  
53  
54 500 have been found that evaluate the effects on cognitive performance, quality of life and

1  
2  
3 501 body composition of adding commercial chocolate with high cocoa content to the usual  
4  
5 502 diet in postmenopausal women.

6  
7 503

8  
9 504 This work will provide novel data helpful for the development of strategies in the  
10  
11 505 nutritional education of particularly vulnerable populations, given their high risk of  
12  
13 506 developing cardiovascular disease, including non-pharmacological therapies and  
14  
15 507 strategies that employ lifestyle modification. This intervention might also have  
16  
17 508 implications for the preparation of recommendations in clinical practice guidelines and  
18  
19 509 quality improvement programs aimed at the care of postmenopausal women.  
20  
21  
22  
23  
24  
25  
26  
27  
28  
29  
30  
31  
32  
33  
34  
35  
36  
37  
38  
39  
40  
41  
42  
43  
44  
45  
46  
47  
48  
49  
50  
51  
52  
53  
54  
55  
56  
57  
58  
59  
60

510 **REFERENCES**

- 511 1. Grassi D, Desideri G, Ferri C. Flavonoids: antioxidants against atherosclerosis. *Nutrients*  
512 2010;2(8):889-902. doi: 10.3390/nu2080889 [published Online First: 2010/08/01]
- 513 2. Grassi D, Desideri G, Croce G, et al. Flavonoids, vascular function and cardiovascular  
514 protection. *Curr Pharm Des* 2009;15(10):1072-84. [published Online First: 2009/04/10]
- 515 3. Visioli F, Bernaert H, Corti R, et al. Chocolate, lifestyle, and health. *Crit Rev Food Sci Nutr*  
516 2009;49(4):299-312. doi: 10.1080/10408390802066805 [published Online First:  
517 2009/02/24]
- 518 4. Cos P, De Bruyne T, Hermans N, et al. Proanthocyanidins in health care: current and new  
519 trends. *Curr Med Chem* 2004;11(10):1345-59. [published Online First: 2004/05/12]
- 520 5. Grassi D, Desideri G, Ferri C. Blood pressure and cardiovascular risk: what about cocoa and  
521 chocolate? *Arch Biochem Biophys* 2010;501(1):112-5. doi: 10.1016/j.abb.2010.05.020  
522 [published Online First: 2010/05/25]
- 523 6. Mink PJ, Scrafford CG, Barraj LM, et al. Flavonoid intake and cardiovascular disease  
524 mortality: a prospective study in postmenopausal women. *Am J Clin Nutr*  
525 2007;85(3):895-909. doi: 10.1093/ajcn/85.3.895 [published Online First: 2007/03/09]
- 526 7. Ramos S, Martin MA, Goya L. Effects of Cocoa Antioxidants in Type 2 Diabetes Mellitus.  
527 *Antioxidants (Basel)* 2017;6(4) doi: 10.3390/antiox6040084 [published Online First:  
528 2017/11/01]
- 529 8. Osakabe N. Flavan 3-ols improve metabolic syndrome risk factors: evidence and  
530 mechanisms. *J Clin Biochem Nutr* 2013;52(3):186-92. doi: 10.3164/jcfn.12-130  
531 [published Online First: 2013/05/25]
- 532 9. Engler MB, Engler MM, Chen CY, et al. Flavonoid-rich dark chocolate improves endothelial  
533 function and increases plasma epicatechin concentrations in healthy adults. *J Am Coll*  
534 *Nutr* 2004;23(3):197-204. [published Online First: 2004/06/11]
- 535 10. Ottaviani JI, Heiss C, Spencer JPE, et al. Recommending flavanols and procyanidins for  
536 cardiovascular health: Revisited. *Mol Aspects Med* 2018;61:63-75. doi:  
537 10.1016/j.mam.2018.02.001 [published Online First: 2018/02/11]
- 538 11. Ludovici V, Barthelmes J, Nagele MP, et al. Cocoa, Blood Pressure, and Vascular Function.  
539 *Front Nutr* 2017;4:36. doi: 10.3389/fnut.2017.00036 [published Online First:  
540 2017/08/22]
- 541 12. Ried K, Fakler P, Stocks NP. Effect of cocoa on blood pressure. *Cochrane Database Syst Rev*  
542 2017;4:CD008893. doi: 10.1002/14651858.CD008893.pub3 [published Online First:  
543 2017/04/26]
- 544 13. Heiss C, Sansone R, Karimi H, et al. Impact of cocoa flavanol intake on age-dependent  
545 vascular stiffness in healthy men: a randomized, controlled, double-masked trial. *Age*  
546 *(Dordr)* 2015;37(3):9794. doi: 10.1007/s11357-015-9794-9 [published Online First:  
547 2015/05/28]
- 548 14. Grassi D, Desideri G, Necozone S, et al. Cocoa consumption dose-dependently improves  
549 flow-mediated dilation and arterial stiffness decreasing blood pressure in healthy  
550 individuals. *J Hypertens* 2015;33(2):294-303. doi: 10.1097/hjh.0000000000000412  
551 [published Online First: 2014/11/08]
- 552 15. Crews WD, Jr., Harrison DW, Wright JW. A double-blind, placebo-controlled, randomized  
553 trial of the effects of dark chocolate and cocoa on variables associated with  
554 neuropsychological functioning and cardiovascular health: clinical findings from a  
555 sample of healthy, cognitively intact older adults. *Am J Clin Nutr* 2008;87(4):872-80.  
556 [published Online First: 2008/04/11]
- 557 16. Dower JI, Geleijnse JM, Gijsbers L, et al. Effects of the pure flavonoids epicatechin and  
558 quercetin on vascular function and cardiometabolic health: a randomized, double-  
559 blind, placebo-controlled, crossover trial. *Am J Clin Nutr* 2015;101(5):914-21. doi:  
560 10.3945/ajcn.114.098590 [published Online First: 2015/05/03]

- 1  
2  
3 561 17. Modena MG. Hypertension in postmenopausal women: how to approach hypertension in  
4 562 menopause. *High Blood Press Cardiovasc Prev* 2014;21(3):201-4. doi: 10.1007/s40292-  
5 563 014-0057-0 [published Online First: 2014/05/24]
- 6 564 18. Zilberman JM, Cerezo GH, Del Sueldo M, et al. Association Between Hypertension,  
7 565 Menopause, and Cognition in Women. *J Clin Hypertens (Greenwich)* 2015;17(12):970-  
8 566 6. doi: 10.1111/jch.12643 [published Online First: 2015/08/08]
- 9 567 19. Okamoto T, Kobayashi R, Natsume M, et al. Habitual cocoa intake reduces arterial stiffness  
10 568 in postmenopausal women regardless of intake frequency: a randomized parallel-  
11 569 group study. *Clin Interv Aging* 2016;11:1645-52. doi: 10.2147/cia.s118152 [published  
12 570 Online First: 2016/11/25]
- 13 571 20. Koli R, Kohler K, Tonteri E, et al. Dark chocolate and reduced snack consumption in mildly  
14 572 hypertensive adults: an intervention study. *Nutr J* 2015;14:84. doi: 10.1186/s12937-  
15 573 015-0075-3 [published Online First: 2015/08/25]
- 16 574 21. West SG, McIntyre MD, Piotrowski MJ, et al. Effects of dark chocolate and cocoa  
17 575 consumption on endothelial function and arterial stiffness in overweight adults. *Br J*  
18 576 *Nutr* 2014;111(4):653-61. doi: 10.1017/s0007114513002912 [published Online First:  
19 577 2013/11/28]
- 20 578 22. Basu A, Betts NM, Leyva MJ, et al. Acute Cocoa Supplementation Increases Postprandial  
21 579 HDL Cholesterol and Insulin in Obese Adults with Type 2 Diabetes after Consumption  
22 580 of a High-Fat Breakfast. *J Nutr* 2015;145(10):2325-32. doi: 10.3945/jn.115.215772  
23 581 [published Online First: 2015/09/05]
- 24 582 23. Scholey AB, French SJ, Morris PJ, et al. Consumption of cocoa flavanols results in acute  
25 583 improvements in mood and cognitive performance during sustained mental effort. *J*  
26 584 *Psychopharmacol* 2010;24(10):1505-14. doi: 10.1177/0269881109106923 [published  
27 585 Online First: 2009/11/28]
- 28 586 24. Field DT, Williams CM, Butler LT. Consumption of cocoa flavanols results in an acute  
29 587 improvement in visual and cognitive functions. *Physiol Behav* 2011;103(3-4):255-60.  
30 588 doi: 10.1016/j.physbeh.2011.02.013 [published Online First: 2011/02/18]
- 31 589 25. Sorond FA, Hurwitz S, Salat DH, et al. Neurovascular coupling, cerebral white matter  
32 590 integrity, and response to cocoa in older people. *Neurology* 2013;81(10):904-9. doi:  
33 591 10.1212/WNL.0b013e3182a351aa [published Online First: 2013/08/09]
- 34 592 26. Socci V, Tempesta D, Desideri G, et al. Enhancing Human Cognition with Cocoa Flavonoids.  
35 593 *Front Nutr* 2017;4:19. doi: 10.3389/fnut.2017.00019 [published Online First:  
36 594 2017/06/01]
- 37 595 27. Mastroiacovo D, Kwik-Urbe C, Grassi D, et al. Cocoa flavanol consumption improves  
38 596 cognitive function, blood pressure control, and metabolic profile in elderly subjects:  
39 597 the Cocoa, Cognition, and Aging (CoCoA) Study--a randomized controlled trial. *Am J*  
40 598 *Clin Nutr* 2015;101(3):538-48. doi: 10.3945/ajcn.114.092189 [published Online First:  
41 599 2015/03/04]
- 42 600 28. Grassi D, Socci V, Tempesta D, et al. Flavanol-rich chocolate acutely improves arterial  
43 601 function and working memory performance counteracting the effects of sleep  
44 602 deprivation in healthy individuals. *J Hypertens* 2016;34(7):1298-308. doi:  
45 603 10.1097/hjh.0000000000000926 [published Online First: 2016/04/19]
- 46 604 29. Crichton GE, Elias MF, Alkerwi A. Chocolate intake is associated with better cognitive  
47 605 function: The Maine-Syracuse Longitudinal Study. *Appetite* 2016;100:126-32. doi:  
48 606 10.1016/j.appet.2016.02.010 [published Online First: 2016/02/14]
- 49 607 30. Masee LA, Ried K, Pase M, et al. The acute and sub-chronic effects of cocoa flavanols on  
50 608 mood, cognitive and cardiovascular health in young healthy adults: a randomized,  
51 609 controlled trial. *Front Pharmacol* 2015;6:93. doi: 10.3389/fphar.2015.00093 [published  
52 610 Online First: 2015/06/05]



- 1  
2  
3 611 31. Nehlig A. The neuroprotective effects of cocoa flavanol and its influence on cognitive  
4 612 performance. *Br J Clin Pharmacol* 2013;75(3):716-27. doi: 10.1111/j.1365-  
5 613 2125.2012.04378.x [published Online First: 2012/07/11]
- 6 614 32. Nurk E, Refsum H, Drevon CA, et al. Intake of flavonoid-rich wine, tea, and chocolate by  
7 615 elderly men and women is associated with better cognitive test performance. *J Nutr*  
8 616 2009;139(1):120-7. doi: 10.3945/jn.108.095182 [published Online First: 2008/12/06]
- 9 617 33. Neshatdoust S, Saunders C, Castle SM, et al. High-flavonoid intake induces cognitive  
10 618 improvements linked to changes in serum brain-derived neurotrophic factor: Two  
11 619 randomised, controlled trials. *Nutr Healthy Aging* 2016;4(1):81-93. doi: 10.3233/nha-  
12 620 1615 [published Online First: 2016/12/31]
- 13 621 34. Marsh CE, Carter HH, Guelfi KJ, et al. Brachial and Cerebrovascular Functions Are Enhanced  
14 622 in Postmenopausal Women after Ingestion of Chocolate with a High Concentration of  
15 623 Cocoa. *J Nutr* 2017;147(9):1686-92. doi: 10.3945/jn.117.250225 [published Online  
16 624 First: 2017/08/11]
- 17 625 35. Balboa-Castillo T, Lopez-Garcia E, Leon-Munoz LM, et al. Chocolate and health-related  
18 626 quality of life: a prospective study. *PLoS One* 2015;10(4):e0123161. doi:  
19 627 10.1371/journal.pone.0123161 [published Online First: 2015/04/23]
- 20 628 36. Costa de Miranda R, Paiva ES, Suter Correia Cadena SM, et al. Polyphenol-Rich Foods  
21 629 Alleviate Pain and Ameliorate Quality of Life in Fibromyalgic Women. *Int J Vitam Nutr*  
22 630 *Res* 2016:1-10. doi: 10.1024/0300-9831/a000253 [published Online First: 2016/11/22]
- 23 631 37. Dmitruk A, Czezelewski J, Czezelewska E, et al. Body composition and fatty tissue  
24 632 distribution in women with various menstrual status. *Rocz Panstw Zakl Hig*  
25 633 2018;69(1):95-101. [published Online First: 2018/03/10]
- 26 634 38. Davison K, Coates AM, Buckley JD, et al. Effect of cocoa flavanols and exercise on  
27 635 cardiometabolic risk factors in overweight and obese subjects. *Int J Obes (Lond)*  
28 636 2008;32(8):1289-96. doi: 10.1038/ijo.2008.66 [published Online First: 2008/05/28]
- 29 637 39. Cuenca-Garcia M, Ruiz JR, Ortega FB, et al. Association between chocolate consumption  
30 638 and fatness in European adolescents. *Nutrition* 2014;30(2):236-9. doi:  
31 639 10.1016/j.nut.2013.07.011 [published Online First: 2013/10/22]
- 32 640 40. Ayoobi N, Jafarirad S, Haghighizadeh MH, et al. Protective Effect of Dark Chocolate on  
33 641 Cardiovascular Disease Factors and Body Composition in Type 2 Diabetes: A Parallel,  
34 642 Randomized, Clinical Trial. *Iran Red Crescent Med J* 2017;19(8):e21644. doi:  
35 643 10.5812/ircmj.21644 [published Online First: 2017-08-01]
- 36 644 41. Di Renzo L, Rizzo M, Sarlo F, et al. Effects of dark chocolate in a population of normal  
37 645 weight obese women: a pilot study. *Eur Rev Med Pharmacol Sci* 2013;17(16):2257-66.  
38 646 [published Online First: 2013/07/31]
- 39 647 42. González-Sarrías A, Combet E, Pinto P, et al. A Systematic Review and Meta-Analysis of the  
40 648 Effects of Flavanol-Containing Tea, Cocoa and Apple Products on Body Composition  
41 649 and Blood Lipids: Exploring the Factors Responsible for Variability in Their Efficacy.  
42 650 *Nutrients* 2017;9(7):746.
- 43 651 43. Kord-Varkaneh H, Ghaedi E, Nazary-Vanani A, et al. Does cocoa/dark chocolate  
44 652 supplementation have favorable effect on body weight, body mass index and waist  
45 653 circumference? A systematic review, meta-analysis and dose-response of randomized  
46 654 clinical trials. *Crit Rev Food Sci Nutr* 2018:0. doi: 10.1080/10408398.2018.1451820  
47 655 [published Online First: 2018/03/20]
- 48 656 44. Greenberg JA, Buijsse B. Habitual chocolate consumption may increase body weight in a  
49 657 dose-response manner. *PLoS One* 2013;8(8):e70271. doi:  
50 658 10.1371/journal.pone.0070271 [published Online First: 2013/08/21]
- 51 659 45. Agrinier N, Cournot M, Dallongeville J, et al. Menopause and modifiable coronary heart  
52 660 disease risk factors: a population based study. *Maturitas* 2010;65(3):237-43. doi:  
53 661 10.1016/j.maturitas.2009.11.023 [published Online First: 2009/12/25]

- 1  
2  
3 662 46. Consellería de Sanidade Xunta de Galicia. Spain; Pan American Organization health (PAHO-  
4 663 WHO); CES University C. Epidat: program for epidemiological data analysis. Version  
5 664 4.2Julio 2016.
- 6 665 47. Scientific Opinion on the substantiation of a health claim related to cocoa flavanols and  
7 666 maintenance of normal endothelium-dependent vasodilation pursuant to Article 13(5)  
8 667 of Regulation (EC) No 1924/2006. *EFSA Journal* 2012;10(7):2809. doi:  
9 668 doi:10.2903/j.efsa.2012.2809
- 10 669 48. Allen JK, Stephens J, Dennison Himmelfarb CR, et al. Randomized controlled pilot study  
11 670 testing use of smartphone technology for obesity treatment. *J Obes*  
12 671 2013;2013:151597. doi: 10.1155/2013/151597 [published Online First: 2014/01/07]
- 13 672 49. Shirai K, Hiruta N, Song M, et al. Cardio-ankle vascular index (CAVI) as a novel indicator of  
14 673 arterial stiffness: theory, evidence and perspectives. *J Atheroscler Thromb*  
15 674 2011;18(11):924-38. [published Online First: 2011/06/02]
- 16 675 50. Ohkuma T, Tomiyama H, Ninomiya T, et al. Proposed Cutoff Value of Brachial-Ankle Pulse  
17 676 Wave Velocity for the Management of Hypertension. *Circ J* 2017;81(10):1540-42. doi:  
18 677 10.1253/circj.CJ-17-0636 [published Online First: 2017/08/25]
- 19 678 51. Korkmaz L, Erkan H, Korkmaz AA, et al. Relationship of aortic knob width with cardio-ankle  
20 679 vascular stiffness index and its value in diagnosis of subclinical atherosclerosis in  
21 680 hypertensive patients: a study on diagnostic accuracy. *Anadolu Kardiyol Derg*  
22 681 2012;12(2):102-6. doi: 10.5152/akd.2012.034 [published Online First: 2012/01/28]
- 23 682 52. Reitan RM. Trail Making Test. Tucson: Reitan Neuropsychology Laboratory 1992.
- 24 683 53. Rey A. L'examen clinique en psychologie. Paris: Presses universitaires de France 1964.
- 25 684 54. Wechsler D. WMS-R Wechsler memory scale. San Antonio, Texas: The Psychological  
26 685 Corporation 1987.
- 27 686 55. Valencia NJ, Laserna, J. A., Pérez-García, M., Orozco, C., Miñán, M., Garrido, C., Morente, G.  
28 687 Influencia de la escolaridad y el sexo sobre la ejecución en el FAS, nombrar animales y  
29 688 nombrar frutas. *Psicología Conductual* 2000;8(2):283-95.
- 30 689 56. Goodglass H KE. Evaluación de la Afasia y de Trastornos Relacionados1986.
- 31 690 57. Badia X, Schiaffino A, Alonso J, et al. Using the EuroQol 5-D in the Catalan general  
32 691 population: feasibility and construct validity. *Qual Life Res* 1998;7(4):311-22.  
33 692 [published Online First: 1998/06/04]
- 34 693 58. Palacios S, Ferrer-Barriendos J, Parrilla JJ, et al. [Health-related quality of life in the Spanish  
35 694 women through and beyond menopause. Development and validation of the  
36 695 Cervantes Scale]. *Med Clin (Barc)* 2004;122(6):205-11. [published Online First:  
37 696 2004/03/12]
- 38 697 59. Karelis AD, Chamberland G, Aubertin-Leheudre M, et al. Validation of a portable  
39 698 bioelectrical impedance analyzer for the assessment of body composition. *Appl Physiol*  
40 699 *Nutr Metab* 2013;38(1):27-32. doi: 10.1139/apnm-2012-0129 [published Online First:  
41 700 2013/02/02]
- 42 701 60. Salas-Salvado J, Rubio MA, Barbany M, et al. [SEEDO 2007 Consensus for the evaluation of  
43 702 overweight and obesity and the establishment of therapeutic intervention criteria].  
44 703 *Med Clin (Barc)* 2007;128(5):184-96; quiz 1 p following 200. [published Online First:  
45 704 2007/02/15]
- 46 705 61. Roman Vinas B, Ribas Barba L, Ngo J, et al. [Validity of the international physical activity  
47 706 questionnaire in the Catalan population (Spain)]. *Gac Sanit* 2013;27(3):254-7. doi:  
48 707 10.1016/j.gaceta.2012.05.013 [published Online First: 2012/10/30]
- 49 708 62. Islam MA, Alam F, Solayman M, et al. Dietary Phytochemicals: Natural Swords Combating  
50 709 Inflammation and Oxidation-Mediated Degenerative Diseases. *Oxid Med Cell Longev*  
51 710 2016;2016:5137431. doi: 10.1155/2016/5137431 [published Online First: 2016/10/11]
- 52 711  
53 712

1  
2  
3 713 **AUTHORS' CONTRIBUTIONS:**

4 714 JIR, JAM, LGO and IGY contributed to the conception and design of the study. IGY,  
5  
6 715 JIR and JAM prepared the manuscript of the study protocol. JIR, JAM, LGO, RAD,  
7  
8 716 SMS, JGS, SMG, ERS, MGM and IGY contributed to the development of the study  
9  
10 717 protocol. JIR, JAM, LGO, RAD, SMS, JGS, SMG, ERS, MGM and IGY provided  
11  
12 718 assistance with statistical methodology and knowledge. JIR, JAM, LGO, RAD, SMS,  
13  
14 719 JGS, SMG, ERS, MGM and IGY provided a critical review of the manuscript.  
15  
16 720 All authors have read and accepted the final version of the protocol.  
17

18  
19 721

20 722 **FUNDING STATEMENT:**

21  
22 723 This study was supported in part by grants funded by la Gerencia Regional de Castilla  
23  
24 724 y León (GRS 1583/B/17). "Lindt & Sprüngli will provide the necessary chocolate for the  
25  
26 725 implementation of the study. This company will not play any role in the design of the  
27  
28 726 study, data analysis, reporting of results or the decision to present the manuscript for  
29  
30 727 publication".  
31

32  
33 728

34 729 **COMPETING INTERESTS STATEMENT:**

35  
36 730 The authors declare that they have no conflicts of interest.  
37

38  
39 731

40 732 **ACKNOWLEDGMENTS:**

41  
42 733 The authors are grateful to all the professionals involved in the ECCAMP study:  
43  
44 734 José I Recio-Rodríguez, José A Maderuelo-Fernández, Luis García-Ortiz, Manuel A  
45  
46 735 Gómez-Marcos, Irene A García-Yu, Rosario Alonso-Domínguez, Sara Mora-Simón,  
47  
48 736 Natalia Sánchez-Aguadero, Jesús González-Sánchez, Cristina Agudo-Conde, Cristina  
49  
50 737 Lugones-Sánchez, Benigna Sánchez-Salgado, Carmen Castaño-Sánchez, Emiliano  
51  
52 738 Rodríguez-Sánchez, Susana González-Manzano, Olaya Tamayo-Morales, and Susana  
53  
54 739 González-Sánchez.  
55

56 740  
57  
58  
59  
60

741 **FIGURE LEGEND:**

742 Figure 1. Study flow chart.

743 Table 1. Polyphenol composition of 99% cocoa chocolate

744

745 **Table 1.** Polyphenols composition of 99% cocoa chocolate.

| <b>Compounds</b>               | <b>Quantity</b> |
|--------------------------------|-----------------|
| Protocatechuic acid (mg/g)     | 0.058 ± 0.008   |
| Procyanidin dimer (B3) (mg/g)  | 0.176 ± 0.013   |
| Catechin (mg/g)                | 1.035 ± 0.105   |
| Procyanidin dimer (B2) (mg/g)  | 1.440 ± 0.055   |
| Epicatechin (mg/g)             | 2.610 ± 0.075   |
| Procyanidin trimer (C1) (mg/g) | 0.853 ± 0.024   |
| Procyanidin A hexoside (mg/g)  | 0.354 ± 0.007   |
| Quercetin glucoside (mg/g)     | 0.002 ± 0.000   |
| Quercetin arabinoside (mg/g)   | 0.003 ± 0.001   |

746

Figure 1. Study flow-chart



Figure 1

157x222mm (300 x 300 DPI)



SPIRIT 2013 Checklist: Recommended items to address in a clinical trial protocol and related documents\*

| Section/item                      | Item No | Description                                                                                                                                                                                                                                                                              | Addressed on page number |
|-----------------------------------|---------|------------------------------------------------------------------------------------------------------------------------------------------------------------------------------------------------------------------------------------------------------------------------------------------|--------------------------|
| <b>Administrative information</b> |         |                                                                                                                                                                                                                                                                                          |                          |
| Title                             | 1       | Descriptive title identifying the study design, population, interventions, and, if applicable, trial acronym                                                                                                                                                                             | Pag 1, line 1            |
| Trial registration                | 2a      | Trial identifier and registry name. If not yet registered, name of intended registry                                                                                                                                                                                                     | Pag 2, line 48           |
|                                   | 2b      | All items from the World Health Organization Trial Registration Data Set                                                                                                                                                                                                                 | NA                       |
| Protocol version                  | 3       | Date and version identifier                                                                                                                                                                                                                                                              | NA                       |
| Funding                           | 4       | Sources and types of financial, material, and other support                                                                                                                                                                                                                              | Pag 25, line 723         |
| Roles and responsibilities        | 5a      | Names, affiliations, and roles of protocol contributors                                                                                                                                                                                                                                  | Pag 25, line 714         |
|                                   | 5b      | Name and contact information for the trial sponsor                                                                                                                                                                                                                                       | Pag 25, line 723         |
|                                   | 5c      | Role of study sponsor and funders, if any, in study design; collection, management, analysis, and interpretation of data; writing of the report; and the decision to submit the report for publication, including whether they will have ultimate authority over any of these activities | Pag 25, line 725         |
|                                   | 5d      | Composition, roles, and responsibilities of the coordinating centre, steering committee, endpoint adjudication committee, data management team, and other individuals or groups overseeing the trial, if applicable (see Item 21a for data monitoring committee)                         | Pag 25, line 714         |

## Introduction

|                          |    |                                                                                                                                                                                                           |                 |
|--------------------------|----|-----------------------------------------------------------------------------------------------------------------------------------------------------------------------------------------------------------|-----------------|
| Background and rationale | 6a | Description of research question and justification for undertaking the trial, including summary of relevant studies (published and unpublished) examining benefits and harms for each intervention        | Pag 7, line 162 |
|                          | 6b | Explanation for choice of comparators                                                                                                                                                                     | Pag 7, line 162 |
| Objectives               | 7  | Specific objectives or hypotheses                                                                                                                                                                         | Pag 8, line 170 |
| Trial design             | 8  | Description of trial design including type of trial (eg, parallel group, crossover, factorial, single group), allocation ratio, and framework (eg, superiority, equivalence, noninferiority, exploratory) | Pag 8, line 177 |

## Methods: Participants, interventions, and outcomes

|                      |     |                                                                                                                                                                                                                                                                                                                                                                                |                   |
|----------------------|-----|--------------------------------------------------------------------------------------------------------------------------------------------------------------------------------------------------------------------------------------------------------------------------------------------------------------------------------------------------------------------------------|-------------------|
| Study setting        | 9   | Description of study settings (eg, community clinic, academic hospital) and list of countries where data will be collected. Reference to where list of study sites can be obtained                                                                                                                                                                                             | Pag 9, line 199   |
| Eligibility criteria | 10  | Inclusion and exclusion criteria for participants. If applicable, eligibility criteria for study centres and individuals who will perform the interventions (eg, surgeons, psychotherapists)                                                                                                                                                                                   | Pag 8, line 190   |
| Interventions        | 11a | Interventions for each group with sufficient detail to allow replication, including how and when they will be administered                                                                                                                                                                                                                                                     | Pag 10, line 2229 |
|                      | 11b | Criteria for discontinuing or modifying allocated interventions for a given trial participant (eg, drug dose change in response to harms, participant request, or improving/worsening disease)                                                                                                                                                                                 | NA                |
|                      | 11c | Strategies to improve adherence to intervention protocols, and any procedures for monitoring adherence (eg, drug tablet return, laboratory tests)                                                                                                                                                                                                                              | Pag 10, line 240  |
|                      | 11d | Relevant concomitant care and interventions that are permitted or prohibited during the trial                                                                                                                                                                                                                                                                                  | Pag 10, line 234  |
| Outcomes             | 12  | Primary, secondary, and other outcomes, including the specific measurement variable (eg, systolic blood pressure), analysis metric (eg, change from baseline, final value, time to event), method of aggregation (eg, median, proportion), and time point for each outcome. Explanation of the clinical relevance of chosen efficacy and harm outcomes is strongly recommended | Pag 11, line 265  |
| Participant timeline | 13  | Time schedule of enrolment, interventions (including any run-ins and washouts), assessments, and visits for participants. A schematic diagram is highly recommended (see Figure)                                                                                                                                                                                               | Figure 1          |

|    |                                                                     |     |                                                                                                                                                                                                                                                                                                                                                                                                              |                  |
|----|---------------------------------------------------------------------|-----|--------------------------------------------------------------------------------------------------------------------------------------------------------------------------------------------------------------------------------------------------------------------------------------------------------------------------------------------------------------------------------------------------------------|------------------|
| 1  |                                                                     |     |                                                                                                                                                                                                                                                                                                                                                                                                              |                  |
| 2  |                                                                     |     |                                                                                                                                                                                                                                                                                                                                                                                                              |                  |
| 3  | Sample size                                                         | 14  | Estimated number of participants needed to achieve study objectives and how it was determined, including clinical and statistical assumptions supporting any sample size calculations                                                                                                                                                                                                                        | Pag 9, line 208  |
| 4  |                                                                     |     |                                                                                                                                                                                                                                                                                                                                                                                                              |                  |
| 5  | Recruitment                                                         | 15  | Strategies for achieving adequate participant enrolment to reach target sample size                                                                                                                                                                                                                                                                                                                          | Pag 9, line 198  |
| 6  |                                                                     |     |                                                                                                                                                                                                                                                                                                                                                                                                              |                  |
| 7  |                                                                     |     |                                                                                                                                                                                                                                                                                                                                                                                                              |                  |
| 8  | <b>Methods: Assignment of interventions (for controlled trials)</b> |     |                                                                                                                                                                                                                                                                                                                                                                                                              |                  |
| 9  |                                                                     |     |                                                                                                                                                                                                                                                                                                                                                                                                              |                  |
| 10 | Allocation:                                                         |     |                                                                                                                                                                                                                                                                                                                                                                                                              |                  |
| 11 |                                                                     |     |                                                                                                                                                                                                                                                                                                                                                                                                              |                  |
| 12 | Sequence generation                                                 | 16a | Method of generating the allocation sequence (eg, computer-generated random numbers), and list of any factors for stratification. To reduce predictability of a random sequence, details of any planned restriction (eg, blocking) should be provided in a separate document that is unavailable to those who enrol participants or assign interventions                                                     | Pag 9, line 219  |
| 13 |                                                                     |     |                                                                                                                                                                                                                                                                                                                                                                                                              |                  |
| 14 |                                                                     |     |                                                                                                                                                                                                                                                                                                                                                                                                              |                  |
| 15 |                                                                     |     |                                                                                                                                                                                                                                                                                                                                                                                                              |                  |
| 16 |                                                                     |     |                                                                                                                                                                                                                                                                                                                                                                                                              |                  |
| 17 | Allocation concealment mechanism                                    | 16b | Mechanism of implementing the allocation sequence (eg, central telephone; sequentially numbered, opaque, sealed envelopes), describing any steps to conceal the sequence until interventions are assigned                                                                                                                                                                                                    | Pag 10, line 225 |
| 18 |                                                                     |     |                                                                                                                                                                                                                                                                                                                                                                                                              |                  |
| 19 |                                                                     |     |                                                                                                                                                                                                                                                                                                                                                                                                              |                  |
| 20 |                                                                     |     |                                                                                                                                                                                                                                                                                                                                                                                                              |                  |
| 21 | Implementation                                                      | 16c | Who will generate the allocation sequence, who will enrol participants, and who will assign participants to interventions                                                                                                                                                                                                                                                                                    | Pag 9, line 219  |
| 22 |                                                                     |     |                                                                                                                                                                                                                                                                                                                                                                                                              |                  |
| 23 |                                                                     |     |                                                                                                                                                                                                                                                                                                                                                                                                              |                  |
| 24 | Blinding (masking)                                                  | 17a | Who will be blinded after assignment to interventions (eg, trial participants, care providers, outcome assessors, data analysts), and how                                                                                                                                                                                                                                                                    | Pag 16, line 407 |
| 25 |                                                                     |     |                                                                                                                                                                                                                                                                                                                                                                                                              |                  |
| 26 |                                                                     |     |                                                                                                                                                                                                                                                                                                                                                                                                              |                  |
| 27 |                                                                     | 17b | If blinded, circumstances under which unblinding is permissible, and procedure for revealing a participant's allocated intervention during the trial                                                                                                                                                                                                                                                         | Pag 16, line 407 |
| 28 |                                                                     |     |                                                                                                                                                                                                                                                                                                                                                                                                              |                  |
| 29 |                                                                     |     |                                                                                                                                                                                                                                                                                                                                                                                                              |                  |
| 30 |                                                                     |     |                                                                                                                                                                                                                                                                                                                                                                                                              |                  |
| 31 | <b>Methods: Data collection, management, and analysis</b>           |     |                                                                                                                                                                                                                                                                                                                                                                                                              |                  |
| 32 |                                                                     |     |                                                                                                                                                                                                                                                                                                                                                                                                              |                  |
| 33 | Data collection methods                                             | 18a | Plans for assessment and collection of outcome, baseline, and other trial data, including any related processes to promote data quality (eg, duplicate measurements, training of assessors) and a description of study instruments (eg, questionnaires, laboratory tests) along with their reliability and validity, if known. Reference to where data collection forms can be found, if not in the protocol | Pag 11, line 273 |
| 34 |                                                                     |     |                                                                                                                                                                                                                                                                                                                                                                                                              |                  |
| 35 |                                                                     |     |                                                                                                                                                                                                                                                                                                                                                                                                              |                  |
| 36 |                                                                     |     |                                                                                                                                                                                                                                                                                                                                                                                                              |                  |
| 37 |                                                                     |     |                                                                                                                                                                                                                                                                                                                                                                                                              |                  |
| 38 |                                                                     | 18b | Plans to promote participant retention and complete follow-up, including list of any outcome data to be collected for participants who discontinue or deviate from intervention protocols                                                                                                                                                                                                                    | NA               |
| 39 |                                                                     |     |                                                                                                                                                                                                                                                                                                                                                                                                              |                  |
| 40 |                                                                     |     |                                                                                                                                                                                                                                                                                                                                                                                                              |                  |
| 41 |                                                                     |     |                                                                                                                                                                                                                                                                                                                                                                                                              |                  |
| 42 |                                                                     |     |                                                                                                                                                                                                                                                                                                                                                                                                              |                  |
| 43 |                                                                     |     |                                                                                                                                                                                                                                                                                                                                                                                                              |                  |
| 44 |                                                                     |     |                                                                                                                                                                                                                                                                                                                                                                                                              |                  |
| 45 |                                                                     |     |                                                                                                                                                                                                                                                                                                                                                                                                              |                  |
| 46 |                                                                     |     |                                                                                                                                                                                                                                                                                                                                                                                                              |                  |
| 47 |                                                                     |     |                                                                                                                                                                                                                                                                                                                                                                                                              |                  |



|    |                     |     |                                                                                                                                                                                                                                                                   |                  |
|----|---------------------|-----|-------------------------------------------------------------------------------------------------------------------------------------------------------------------------------------------------------------------------------------------------------------------|------------------|
| 1  |                     |     |                                                                                                                                                                                                                                                                   |                  |
| 2  |                     |     |                                                                                                                                                                                                                                                                   |                  |
| 3  | Data management     | 19  | Plans for data entry, coding, security, and storage, including any related processes to promote data quality (eg, double data entry; range checks for data values). Reference to where details of data management procedures can be found, if not in the protocol | Pag 16, line 401 |
| 4  |                     |     |                                                                                                                                                                                                                                                                   |                  |
| 5  |                     |     |                                                                                                                                                                                                                                                                   |                  |
| 6  |                     |     |                                                                                                                                                                                                                                                                   |                  |
| 7  | Statistical methods | 20a | Statistical methods for analysing primary and secondary outcomes. Reference to where other details of the statistical analysis plan can be found, if not in the protocol                                                                                          | Pag 17, line 424 |
| 8  |                     |     |                                                                                                                                                                                                                                                                   |                  |
| 9  |                     |     |                                                                                                                                                                                                                                                                   |                  |
| 10 |                     | 20b | Methods for any additional analyses (eg, subgroup and adjusted analyses)                                                                                                                                                                                          | Pag 18, line 443 |
| 11 |                     |     |                                                                                                                                                                                                                                                                   |                  |
| 12 |                     | 20c | Definition of analysis population relating to protocol non-adherence (eg, as randomised analysis), and any statistical methods to handle missing data (eg, multiple imputation)                                                                                   | Pag 17, line 426 |
| 13 |                     |     |                                                                                                                                                                                                                                                                   |                  |
| 14 |                     |     |                                                                                                                                                                                                                                                                   |                  |

### 15 **Methods: Monitoring**

|    |                 |     |                                                                                                                                                                                                                                                                                                                                       |    |
|----|-----------------|-----|---------------------------------------------------------------------------------------------------------------------------------------------------------------------------------------------------------------------------------------------------------------------------------------------------------------------------------------|----|
| 16 |                 |     |                                                                                                                                                                                                                                                                                                                                       |    |
| 17 | Data monitoring | 21a | Composition of data monitoring committee (DMC); summary of its role and reporting structure; statement of whether it is independent from the sponsor and competing interests; and reference to where further details about its charter can be found, if not in the protocol. Alternatively, an explanation of why a DMC is not needed | NA |
| 18 |                 |     |                                                                                                                                                                                                                                                                                                                                       |    |
| 19 |                 |     |                                                                                                                                                                                                                                                                                                                                       |    |
| 20 |                 |     |                                                                                                                                                                                                                                                                                                                                       |    |
| 21 |                 |     |                                                                                                                                                                                                                                                                                                                                       |    |
| 22 |                 | 21b | Description of any interim analyses and stopping guidelines, including who will have access to these interim results and make the final decision to terminate the trial                                                                                                                                                               | NA |
| 23 |                 |     |                                                                                                                                                                                                                                                                                                                                       |    |
| 24 |                 |     |                                                                                                                                                                                                                                                                                                                                       |    |
| 25 | Harms           | 22  | Plans for collecting, assessing, reporting, and managing solicited and spontaneously reported adverse events and other unintended effects of trial interventions or trial conduct                                                                                                                                                     | NA |
| 26 |                 |     |                                                                                                                                                                                                                                                                                                                                       |    |
| 27 |                 |     |                                                                                                                                                                                                                                                                                                                                       |    |
| 28 | Auditing        | 23  | Frequency and procedures for auditing trial conduct, if any, and whether the process will be independent from investigators and the sponsor                                                                                                                                                                                           | NA |
| 29 |                 |     |                                                                                                                                                                                                                                                                                                                                       |    |
| 30 |                 |     |                                                                                                                                                                                                                                                                                                                                       |    |
| 31 |                 |     |                                                                                                                                                                                                                                                                                                                                       |    |

### 32 **Ethics and dissemination**

|    |                          |    |                                                                                                                                                                                                                                  |                  |
|----|--------------------------|----|----------------------------------------------------------------------------------------------------------------------------------------------------------------------------------------------------------------------------------|------------------|
| 33 |                          |    |                                                                                                                                                                                                                                  |                  |
| 34 | Research ethics approval | 24 | Plans for seeking research ethics committee/institutional review board (REC/IRB) approval                                                                                                                                        | Pag 18, line 467 |
| 35 |                          |    |                                                                                                                                                                                                                                  |                  |
| 36 |                          |    |                                                                                                                                                                                                                                  |                  |
| 37 | Protocol amendments      | 25 | Plans for communicating important protocol modifications (eg, changes to eligibility criteria, outcomes, analyses) to relevant parties (eg, investigators, REC/IRBs, trial participants, trial registries, journals, regulators) | NA               |
| 38 |                          |    |                                                                                                                                                                                                                                  |                  |
| 39 |                          |    |                                                                                                                                                                                                                                  |                  |
| 40 |                          |    |                                                                                                                                                                                                                                  |                  |
| 41 |                          |    |                                                                                                                                                                                                                                  |                  |
| 42 |                          |    |                                                                                                                                                                                                                                  |                  |
| 43 |                          |    |                                                                                                                                                                                                                                  |                  |
| 44 |                          |    |                                                                                                                                                                                                                                  |                  |
| 45 |                          |    |                                                                                                                                                                                                                                  |                  |
| 46 |                          |    |                                                                                                                                                                                                                                  |                  |
| 47 |                          |    |                                                                                                                                                                                                                                  |                  |

|    |                               |     |                                                                                                                                                                                                                                                                                     |                  |
|----|-------------------------------|-----|-------------------------------------------------------------------------------------------------------------------------------------------------------------------------------------------------------------------------------------------------------------------------------------|------------------|
| 1  |                               |     |                                                                                                                                                                                                                                                                                     |                  |
| 2  |                               |     |                                                                                                                                                                                                                                                                                     |                  |
| 3  | Consent or assent             | 26a | Who will obtain informed consent or assent from potential trial participants or authorised surrogates, and how (see Item 32)                                                                                                                                                        | Pag 18, line 472 |
| 4  |                               |     |                                                                                                                                                                                                                                                                                     |                  |
| 5  |                               |     |                                                                                                                                                                                                                                                                                     |                  |
| 6  |                               | 26b | Additional consent provisions for collection and use of participant data and biological specimens in ancillary studies, if applicable                                                                                                                                               | NA               |
| 7  |                               |     |                                                                                                                                                                                                                                                                                     |                  |
| 8  | Confidentiality               | 27  | How personal information about potential and enrolled participants will be collected, shared, and maintained in order to protect confidentiality before, during, and after the trial                                                                                                | Pag 19, line 475 |
| 9  |                               |     |                                                                                                                                                                                                                                                                                     |                  |
| 10 |                               |     |                                                                                                                                                                                                                                                                                     |                  |
| 11 | Declaration of interests      | 28  | Financial and other competing interests for principal investigators for the overall trial and each study site                                                                                                                                                                       | Pag 25, line 730 |
| 12 |                               |     |                                                                                                                                                                                                                                                                                     |                  |
| 13 |                               |     |                                                                                                                                                                                                                                                                                     |                  |
| 14 | Access to data                | 29  | Statement of who will have access to the final trial dataset, and disclosure of contractual agreements that limit such access for investigators                                                                                                                                     | Pag 16, line 400 |
| 15 |                               |     |                                                                                                                                                                                                                                                                                     |                  |
| 16 |                               |     |                                                                                                                                                                                                                                                                                     |                  |
| 17 | Ancillary and post-trial care | 30  | Provisions, if any, for ancillary and post-trial care, and for compensation to those who suffer harm from trial participation                                                                                                                                                       | NA               |
| 18 |                               |     |                                                                                                                                                                                                                                                                                     |                  |
| 19 |                               |     |                                                                                                                                                                                                                                                                                     |                  |
| 20 | Dissemination policy          | 31a | Plans for investigators and sponsor to communicate trial results to participants, healthcare professionals, the public, and other relevant groups (eg, via publication, reporting in results databases, or other data sharing arrangements), including any publication restrictions | Pag 19, line 481 |
| 21 |                               |     |                                                                                                                                                                                                                                                                                     |                  |
| 22 |                               |     |                                                                                                                                                                                                                                                                                     |                  |
| 23 |                               |     |                                                                                                                                                                                                                                                                                     |                  |
| 24 |                               |     |                                                                                                                                                                                                                                                                                     |                  |
| 25 |                               | 31b | Authorship eligibility guidelines and any intended use of professional writers                                                                                                                                                                                                      | Pag 19, line 481 |
| 26 |                               |     |                                                                                                                                                                                                                                                                                     |                  |
| 27 |                               | 31c | Plans, if any, for granting public access to the full protocol, participant-level dataset, and statistical code                                                                                                                                                                     | Pag 19, line 481 |
| 28 |                               |     |                                                                                                                                                                                                                                                                                     |                  |
| 29 | <b>Appendices</b>             |     |                                                                                                                                                                                                                                                                                     |                  |
| 30 |                               |     |                                                                                                                                                                                                                                                                                     |                  |
| 31 | Informed consent materials    | 32  | Model consent form and other related documentation given to participants and authorised surrogates                                                                                                                                                                                  | NA               |
| 32 |                               |     |                                                                                                                                                                                                                                                                                     |                  |
| 33 |                               |     |                                                                                                                                                                                                                                                                                     |                  |
| 34 | Biological specimens          | 33  | Plans for collection, laboratory evaluation, and storage of biological specimens for genetic or molecular analysis in the current trial and for future use in ancillary studies, if applicable                                                                                      | NA               |
| 35 |                               |     |                                                                                                                                                                                                                                                                                     |                  |
| 36 |                               |     |                                                                                                                                                                                                                                                                                     |                  |

37 \*It is strongly recommended that this checklist be read in conjunction with the SPIRIT 2013 Explanation & Elaboration for important clarification on the items.  
 38 Amendments to the protocol should be tracked and dated. The SPIRIT checklist is copyrighted by the SPIRIT Group under the Creative Commons  
 39 "[Attribution-NonCommercial-NoDerivs 3.0 Unported](https://creativecommons.org/licenses/by-nc-nd/3.0/)" license.  
 40

41  
 42  
 43  
 44  
 45  
 46  
 47
